# Supplementary material for: Protocol for faecal microbiota transplantation in irritable bowel syndrome: the MISCEAT study – a randomised, double-blind cross-over study using mixed microbiota from healthy donors
Source: PubMed Central journal article supplement — BMJ Open. 2022 Jun 27;12(6):e056594. doi: 10.1136/bmjopen-2021-056594 (PMC9237876; doi:10.1136/bmjopen-2021-056594), 2022-06-27
Supplement: bmjopen-2021-056594.draft_revisions.pdf [file bmjopen-2021-056594.draft_revisions.pdf]

# BMJ Open

BMJ Open is committed to open peer review. As part of this commitment we make the peer review history of every article we publish publicly available.

When an article is published we post the peer reviewers' comments and the authors' responses online. We also post the versions of the paper that were used during peer review. These are the versions that the peer review comments apply to.

The versions of the paper that follow are the versions that were submitted during the peer review process. They are not the versions of record or the final published versions. They should not be cited or distributed as the published version of this manuscript.

BMJ Open is an open access journal and the full, final, typeset and author-corrected version of record of the manuscript is available on our site with no access controls, subscription charges or pay-per-view fees (<http://bmjopen.bmj.com>).

If you have any questions on BMJ Open's open peer review process please email [info.bmjopen@bmj.com](mailto:info.bmjopen@bmj.com)

# BMJ Open

## Protocol for faecal microbiota transplantation in irritable bowel syndrome – the MISCEAT study: a randomised, double-blind cross-over study utilising mixed microbiota from healthy donors

|                               |                                                                                                                                                                                                                                                                                                                                                                                                                                                                                                                                                                                                                                                                                                                                                                                                                                                                                                                                     |
|-------------------------------|-------------------------------------------------------------------------------------------------------------------------------------------------------------------------------------------------------------------------------------------------------------------------------------------------------------------------------------------------------------------------------------------------------------------------------------------------------------------------------------------------------------------------------------------------------------------------------------------------------------------------------------------------------------------------------------------------------------------------------------------------------------------------------------------------------------------------------------------------------------------------------------------------------------------------------------|
| Journal:                      | <i>BMJ Open</i>                                                                                                                                                                                                                                                                                                                                                                                                                                                                                                                                                                                                                                                                                                                                                                                                                                                                                                                     |
| Manuscript ID                 | bmjopen-2021-056594                                                                                                                                                                                                                                                                                                                                                                                                                                                                                                                                                                                                                                                                                                                                                                                                                                                                                                                 |
| Article Type:                 | Protocol                                                                                                                                                                                                                                                                                                                                                                                                                                                                                                                                                                                                                                                                                                                                                                                                                                                                                                                            |
| Date Submitted by the Author: | 19-Aug-2021                                                                                                                                                                                                                                                                                                                                                                                                                                                                                                                                                                                                                                                                                                                                                                                                                                                                                                                         |
| Complete List of Authors:     | Hurych, Jakub; Charles University Second Faculty of Medicine, Department of Medical Microbiology; Charles University Second Faculty of Medicine, Department of Paediatrics<br>Vejmelka, Jiri; Charles University Third Faculty of Medicine, Department of Internal Medicine<br>Vodolanova, Lucie; Charles University Second Faculty of Medicine, Department of Paediatrics<br>Kramna, Lenka; Charles University Second Faculty of Medicine, Department of Paediatrics<br>Larionov, Vladyslav; Charles University Second Faculty of Medicine, Department of Paediatrics<br>Kulich, Michal; Charles University, Department of Probability and Statistics<br>Cinek, Ondrej; Charles University Second Faculty of Medicine, Department of Pediatrics; Charles University Second Faculty of Medicine, Department of Medical Microbiology<br>Kohout, Pavel; Charles University Third Faculty of Medicine, Department of Internal Medicine |
| Keywords:                     | Functional bowel disorders < GASTROENTEROLOGY, Adult gastroenterology < GASTROENTEROLOGY, MICROBIOLOGY                                                                                                                                                                                                                                                                                                                                                                                                                                                                                                                                                                                                                                                                                                                                                                                                                              |
|                               |                                                                                                                                                                                                                                                                                                                                                                                                                                                                                                                                                                                                                                                                                                                                                                                                                                                                                                                                     |

SCHOLARONE™  
Manuscripts

1  
2  
3 1 **Protocol for faecal microbiota transplantation in irritable bowel syndrome – the MISCEAT**  
4  
5 2 **study: a randomised, double-blind cross-over study utilising mixed microbiota from**  
6  
7  
8 3 **healthy donors**  
9

10 4  
11  
12 5 Jakub Hurych<sup>1,2\*</sup>, Jiri Vejmelka<sup>3\*</sup>, Lucie Vodolanova<sup>2</sup>, Lenka Kramna<sup>2</sup>, Vladyslav Larionov<sup>2</sup>, Michal  
13  
14 6 Kulich<sup>4</sup>, Ondrej Cinek<sup>1,2†</sup>, Pavel Kohout<sup>3†</sup>  
15

16  
17 7 \*Shared first authorship, † shared last authorship  
18  
19 8

20  
21 9 **Affiliations:**  
22

23  
24 10 <sup>1</sup> Department of Medical Microbiology, 2nd Faculty of Medicine Charles University, Prague, Czechia  
25

26 11 <sup>2</sup> Department of Paediatrics, 2nd Faculty of Medicine Charles University, Prague, Czechia  
27

28 12 <sup>3</sup> Department of Internal Medicine, 3rd Faculty of Medicine Charles University and Thomayer  
29  
30 13 University Hospital, Prague, Czechia  
31

32  
33 14 <sup>4</sup> Department of Probability and Statistics, Faculty of Mathematics and Physics, Charles University,  
34  
35 15 Prague, Czechia  
36

37 16  
38  
39 17 **Correspondance:** Jakub Hurych, M.D., Department of Paediatrics and Department of Medical  
40  
41 18 Microbiology, 2nd Faculty of Medicine Charles University, Prague, Czechia; V Uvalu 84/5, 15006,  
42  
43 19 Prague 5; [jakub.hurych@lfmotol.cuni.cz](mailto:jakub.hurych@lfmotol.cuni.cz)  
44  
45

46 20  
47  
48 21 **Word counts:** 3598  
49

50  
51 22 **Abbreviations:** IBS, Irritable Bowel Syndrome; IBS-D, diarrheal type of irritable bowel syndrome; IBS-  
52  
53 23 M, mixed type of irritable bowel syndrome; IBS-C, constipated type of irritable bowel syndrome; IBS-  
54  
55 24 SSS, Irritable Bowel Syndrome Severity Scale Score  
56  
57  
58  
59  
60

1  
2  
3 25 **Keywords:** irritable bowel syndrome, faecal microbiota transplantation, irritable bowel syndrome  
4  
5 26 severity scale score, gut microbiome  
6  
7  
8  
9  
10  
11  
12  
13  
14  
15  
16  
17  
18  
19  
20  
21  
22  
23  
24  
25  
26  
27  
28  
29  
30  
31  
32  
33  
34  
35  
36  
37  
38  
39  
40  
41  
42  
43  
44  
45  
46  
47  
48  
49  
50  
51  
52  
53  
54  
55  
56  
57  
58  
59  
60

For peer review only

1  
2  
3 **28 AUTHORS AND INSTITUTIONS**  
4

5 29 Jakub Hurych, M.D., Department of Paediatrics and Department of Medical Microbiology, 2nd  
6

7 30 Faculty of Medicine, Charles University, University Hospital Motol, Prague, Czechia;  
8

9  
10 31 [jakub.hurych@lfmotol.cuni.cz](mailto:jakub.hurych@lfmotol.cuni.cz)  
11

12 32  
13

14 33 Jiří Vejmelka, M.D., Department of Internal Medicine, 3rd Faculty of Medicine Charles University and  
15

16 34 Thomayer University Hospital, Prague, Czechia, [jiri.vejmelka@ftn.cz](mailto:jiri.vejmelka@ftn.cz)  
17

18 35  
19

20 36 Lucie Vodolánová, M.Sc., Department of Paediatrics and Department Medical Microbiology, 2nd  
21

22 37 Faculty of Medicine ,Charles University, University Hospital Motol, Prague, Czechia;  
23

24 38 [lucie.vodolanova@lfmotol.cuni.cz](mailto:lucie.vodolanova@lfmotol.cuni.cz)  
25

26 39  
27

28 40 Lenka Kramná, M.Sc., Ph.D., Department of Paediatrics and Department Medical Microbiology, 2nd  
29

30 41 Faculty of Medicine ,Charles University, University Hospital Motol, Prague, Czechia;  
31

32 42 [lenka.kramna@lfmotol.cuni.cz](mailto:lenka.kramna@lfmotol.cuni.cz)  
33

34 43  
35

36 44 Vladyslav Larionov, M.Sc., Department of Paediatrics and Department Medical Microbiology, 2nd  
37

38 45 Faculty of Medicine ,Charles University, University Hospital Motol, Prague, Czechia;  
39

40 46 [vladyslav.larionov@fnmotol.cz](mailto:vladyslav.larionov@fnmotol.cz)  
41

42 47  
43

44 48 Assoc. prof. Michal Kulich, M.Sc., Ph.D., Department of Probability and Statistics, Faculty of  
45

46 49 Mathematics and Physics, Charles University, Prague, Czechia; [kulich@karlin.mff.cuni.cz](mailto:kulich@karlin.mff.cuni.cz)  
47

48 50  
49

50 51 Prof. Ondřej Cinek, M.D., Ph.D., Department of Paediatrics and Department of Medical Microbiology,  
51

52 52 2nd Faculty of Medicine ,Charles University, University Hospital Motol, Prague, Czechia;  
53

54 53 [ondrej.cinek@lfmotol.cuni.cz](mailto:ondrej.cinek@lfmotol.cuni.cz)  
55  
56  
57  
58  
59  
60

1  
2  
3 54  
4  
5  
6 55 Assoc. prof. Pavel Kohout, M.D., Ph.D. Department of Internal Medicine, 3rd Faculty of Medicine  
7  
8 56 Charles University and Thomayer University Hospital, Prague, Czechia; pavel.kohout@ftn.cz  
9  
10  
11  
12  
13  
14  
15  
16  
17  
18  
19  
20  
21  
22  
23  
24  
25  
26  
27  
28  
29  
30  
31  
32  
33  
34  
35  
36  
37  
38  
39  
40  
41  
42  
43  
44  
45  
46  
47  
48  
49  
50  
51  
52  
53  
54  
55  
56  
57  
58  
59  
60

For peer review only

**ABSTRACT**

**Introduction.** Several studies have demonstrated dysbiosis in irritable bowel syndrome. Therefore, faecal microbiota transplantation, whose effect has been convincingly proven in *Clostridioides difficile* infections, may hold promise in other conditions, including irritable bowel syndrome. Our study will examine the effectiveness of stool transfer with artificially increased microbial diversity in the treatment of irritable bowel syndrome.

**Methods and analysis.** A three-group, double-blind, randomized, cross-over, placebo-controlled study of two pairs of gut microbiota transfer will be conducted in 99 patients with diarrhoeal or mixed type of irritable bowel syndrome. Patients (males and females aged 18-65) will be randomised into three equally sized groups: group A will first receive two enemas of study microbiota mixture (deep-frozen stored stool microbiota mixed from eight donors), after eight weeks, they will receive two enemas with placebo (autoclaved microbiota mixture), whereas group B will first receive placebo, then study microbiota mixture. Finally, group C will receive placebos only. The irritable bowel syndrome severity symptom score (IBS-SSS) questionnaire scores will be collected at baseline (week -1), and then at weeks 3,5,8,11,13 and 32. Faecal bacteriome will be profiled before and regularly after interventions using 16S rDNA next-generation sequencing. Biochemistry and haematology workup, anthropometry, bioimpedance, dietary questionnaire, and food records data will be obtained at study visits during the follow-up period. The primary outcome is the change in the IBS-SSS between the baseline and four weeks after the intervention for each patient compared to placebo. Secondary outcomes are IBS-SSS at two and 32 weeks compared to placebo; changes in the gut microbiome, urgent defecations frequency, Bristol stool scale, abdominal pain and bloating and anthropometric parameters.

**Ethics and dissemination.** The study was approved by the Ethics Committee of the Institute for Clinical and Experimental Medicine and Thomayer University Hospital, Czechia (G-18-26). The study

1  
2  
3 81 results will be published in peer-reviewed journals and presented at international conferences and  
4  
5 82 patient groups meetings.  
6  
7

8 83 **Study registration number.** NCT04899869  
9  
10

11 84  
12  
13

## 14 85 **STRENGTHS AND LIMITATIONS OF THIS STUDY**

- 16  
17 86 ➤ Usage of mixed microbiota from multiple donors inflates the diversity of transferred microbiota  
18  
19 87 by enriching it for numerous rare species.  
20  
21 88 ➤ All interventions will be carried out using the same active mixed microbiota or the same placebo.  
22  
23 89 ➤ Each intervention consists of two consecutive transfers, which increases the probability that the  
24  
25 90 transferred microbiota engrafts.  
26  
27 91 ➤ Microbiome profiling, food records, anthropometry and bioimpedance data allow detailed  
28  
29 92 monitoring of transfer effectiveness.  
30  
31 93 ➤ Mucosa-associated microbiota will not be assessed because the stool transfer will be performed  
32  
33 94 by enema, not colonoscopy that would allow biopsies.  
34  
35  
36  
37  
38  
39  
40  
41  
42  
43  
44  
45  
46  
47  
48  
49  
50  
51  
52  
53  
54  
55  
56  
57  
58  
59  
60



## 95 INTRODUCTION

96 Irritable bowel syndrome (IBS) is characterised as recurrent abdominal pain on average at least one  
97 day/week in the last three months, associated with two or more of the following criteria: 1) related  
98 to defecation; 2) associated with a change in the frequency of stool; 3) associated with a change in  
99 the form (appearance) of stool [1]. It is common among the adult European population (approx. 10%  
100 [2]), but its aetiology is still unknown. It may, among other causes, include micro-inflammation,  
101 disturbance of the brain-gut axis, inadequate secretion of bile acids, increased permeability of the  
102 gut epithelial barrier, or gut dysbiosis. Dysbiosis in IBS has been suggested by several studies  
103 (reviewed, e.g. in Rajilic-Stojanovic et al. [3]). There are indications that Firmicutes may be disturbed,  
104 with *Dorea*, *Blautia* and *Roseburia* increased, whereas *Veillonella* and *Faecalibacterium* decreased.  
105 Among Actinobacteria, a decrease in *Bifidobacterium* was noted, and among Proteobacteria,  
106 *Enterobacteriaceae* were increased. Conflicting and heterogeneous results were reported for  
107 Bacteroidetes. The major limitation of available studies is their cross-sectional character, which may  
108 not be enough in a disease where diarrhoeal episodes alternate with normal stool composition or  
109 constipation.

110  
111 The faecal microbiota transplantation (FMT) has gained popularity by its remarkable effect in  
112 recurrent *Clostridioides difficile* infections, where it has now become a recognised life-saving therapy  
113 [4]. The first published randomized, double-blinded study on FMT in IBS used stool intervention from  
114 an allogeneic donor or autologous stool. The intervention was centred on a well-defined group of IBS  
115 of predominantly diarrhoeal form. The stool was transferred by colonoscopy to the cecum. The  
116 primary outcome was an improvement in the *Irritable Bowel Syndrome - Severity Symptom Score*  
117 (IBS-SSS). The treatment was associated with a significant effect at three months but not at 12  
118 months post-intervention [5]. This study used single donors and did not assess stool microbiota.  
119 Thus, the transferred microbiota likely varied between transfers both in their composition and in  
120 their diversity.

1  
2  
3 121  
4  
5 122 Our study protocol aims to test whether faecal microbiota transplantation of mixed microbiota from  
6  
7 123 several selected donors can alleviate symptoms of IBS measured by IBS-SSS at four weeks after the  
8  
9 124 intervention, compared to autoclaved placebo. Secondary study aims are to test the acute (after two  
10  
11 125 weeks) and the long-term effect (after six months) on symptoms relief. We also focus on changes in  
12  
13 126 the gut microbiome composition, frequency of urgent defecations, Bristol stool scale, abdominal pain  
14  
15 127 and bloating, body weight, fat content and anthropometric measurements (including waist, hip and  
16  
17 128 limbs circumferences and skinfold thickness.  
18

19  
20  
21 129  
22  
23 130 We hypothesise that the transfer of active microbiota of high diversity can lead to changes in the  
24  
25 131 patient's gut microbiome composition and/or function to alleviate IBS symptoms.  
26  
27  
28  
29  
30  
31  
32  
33  
34  
35  
36  
37  
38  
39  
40  
41  
42  
43  
44  
45  
46  
47  
48  
49  
50  
51  
52  
53  
54  
55  
56  
57  
58  
59  
60

## 132 **METHODS AND ANALYSIS**

### 133 **Study design**

134 This is a three-group, double-blind, placebo-controlled, randomized, cross-over study in adult  
135 patients diagnosed with IBS (diarrhoeal or mixed form) according to Rome IV criteria. Each study  
136 subject will undergo two pairs of FMT (a total of four enemas for each patient), with the pairs of  
137 transfers being eight weeks apart. The active intervention substance is a mixed stool microbiota  
138 derived from healthy individuals preselected for high alpha diversity of their microbiome and  
139 distance in community ordination from IBS patients microbiota. Placebo is the same mixture,  
140 inactivated by autoclaving.

141

142 The study subjects are randomly assigned to one of three groups: A) enema with active substance  
143 first and with placebo second or B) enema with placebo first and active substance second or C)  
144 enemas of placebo only (detailed scheme in **Figure 1**). Eligible participants will be followed-up for 32  
145 weeks after the first intervention to monitor symptom severity scoring of IBS (IBS-SSS), with regular  
146 profiling of their gut microbiome and other parameters (frequency of urgent defecations, Bristol  
147 stool scale, abdominal pain and bloating, body weight, fat content, and other anthropometric  
148 parameters).

149

150 The placebo group is planned because of the unknown onset and duration of the intervention effect:  
151 if the beginning of an effect is delayed, or if it persists for a long time, simple cross-over design would  
152 not have sufficient power due to the carry-over effect. In case the FMT was associated with  
153 significant but not durable amelioration of the status, the control group would still increase the  
154 statistical power.

155

156 This study protocol is reported as per the SPIRIT guidelines [6] (for the SPIRIT checklist, see **Appendix**  
157 **1**).

158

### 159 **Study setting**

160 The participants are recruited at a single center, the Department of Internal Medicine, Thomayer  
161 University Hospital in Prague, Czech Republic. This hospital has approximately 1,000 beds, including  
162 80 in ICU's, serves approximately 50,000 patients per year. The center is experienced in treating  
163 patients with IBS and other functional gastrointestinal disorders, with about 200 such patients  
164 registered and further subjects coming for consultations from other workplaces to this tertiary  
165 referral centre.

166

### 167 **Recruitment and eligibility criteria**

168 Stool donors

169 Stool donor candidates were recruited among blood donors at Thomayer University Hospital and  
170 medical students in their first year of study (i.e. preclinical) from the 2nd Faculty of Medicine, Charles  
171 University, Prague. We obtained stool samples from 58 such candidates fulfilling the inclusion criteria  
172 (**Table 1**). Based on their high bacterial alpha-diversity and the position on the ordination plot of the  
173 weighted Unifrac distance against 46 patients with IBS-D (**Figure 2**), 14 candidates proceeded to the  
174 safety screening, whereby eight passed it (for reasons of candidate's exclusion, see **Figure 3**).

175

176 After 14 potential donors were selected based on the microbiota composition, they were screened  
177 for infectious diseases and clinically examined as indicated by the *European consensus conference on*  
178 *faecal microbiota transplantation in clinical practice guidelines* [7] (**Table 2**). All subjects were also  
179 repeatedly tested for SARS-CoV-2 from both nasopharyngeal swab and stool. Six candidates were  
180 excluded (for reasons, see **Figure 3**), whereas eight became regular stool donors. These eight donors  
181 were regularly investigated as follows:

- 1  
2  
3 182 - at every donation: by questionnaire for gastrointestinal symptoms, antibiotic usage, unprotected  
4  
5 183 sex, travelling to exotic countries; clinical signs of COVID-19; the presence of SARS-CoV-2 in the  
6  
7 184 donated stool;  
8  
9  
10 185 - every 4 weeks: for SARS-CoV-2 from nasopharyngeal swab;  
11  
12 186 - every 8-12 weeks: for all other stool tests mentioned in **Table 2**.

13  
14 187

15  
16 188 Prospective study participants

17  
18 189 Patients diagnosed with IBS-D (diarrheal type) or IBS-M (mixed diarrhoeal and constipation type) who  
19  
20 190 fulfil the inclusion and exclusion criteria listed in **Table 3** are recruited via regular' patient's check-ups  
21  
22 191 at the Gastroenterological unit at Thomayer University Hospital, by referrals from their general  
23  
24 192 practitioners, following our newspaper articles or word of mouth.  
25  
26  
27

28 193

### 194 **Study microbiota mixture for intervention**

195 The intervention microbiota is a mixture of regular stool donations from the eight regular donors.  
196 The collection of stools for this purpose is already completed. The donors were advised to regularly  
197 defecate at their home toilet into a clean plastic bag placed in Fecotainer (Excretas Medical, NL) with  
198 an Anaerogen bag (Thermo Scientific, USA). This bag generated an anaerobic atmosphere during  
199 transport to ensure anaerobes survival. The stool was transported to the laboratory with the  
200 maximum allowable time until processing being 6 hours; the actual time was approximately 1.5  
201 hours. The stool was weighed upon arrival, inspected for blood admixture, and immediately  
202 processed by blending with a solution consisting of sterile 0.9% saline (160 ml per 100 g of stool),  
203 sterile phosphate buffer saline at pH 7.4 (20 ml per 100 g of stool) and sterile 99.5% glycerol (20 ml  
204 per 100 g stool, which is approximately 10% of solution's volume; therefore, it is unlikely to have  
205 laxative properties upon administration). From our experience, ~ 105 ml of the mixture represents  
206 ~40 g of stool. The mixture was then filtered through a sterile stainless steel mesh of 0.8 mm pore  
207 size into a sterile plastic bottle and immediately frozen at -80°C. Whenever possible (blending or

1  
2  
3 208 post-filtration), the procedure was performed under a nitrogen atmosphere to protect obligate  
4  
5 209 anaerobes. All stool portions were mixed in a large stainless steel bucket using an electric mortar  
6  
7 210 mixer under anaerobic conditions and low temperatures (on ice).  
8

9  
10 211  
11  
12 212 The mixed microbiota substance was divided into aliquots of 13-14 g (which is ~ 35 ml). Two-thirds of  
13  
14 213 the tubes serve as a placebo: they were immediately autoclaved at 121°C for 30 minutes with slow  
15  
16 214 cooling. Pre-sterilised tubes were used to ensure that autoclaved placebos will not be visually  
17  
18 215 distinguishable from tubes with the active substance. Assignment of tubes to the autoclave,  
19  
20 216 numbering, sealing, and labelling was done under the guidance of a statistical unit member (see  
21  
22 217 below).  
23  
24  
25  
26

27  
28 219 All aliquot tubes are kept frozen at -80°C in the same type of plastic tubes, labelled by codes. Three  
29  
30 220 such aliquots represent one dose for FMT (~40 g of stool, in ~105 ml). Aliquoting into multiple 50 ml  
31  
32 221 tubes instead of one larger volume was decided because of the availability of durable plastic, which  
33  
34 222 must be both autoclavable and deep frost resistant.  
35  
36

37 223  
38  
39 224 Before administering, the study microbiota mixture will be thawed in a warm (37°C) water bath, with  
40  
41 225 intermittent mixing by inverting the tubes.  
42

43 226

### 44 45 227 **Randomization, allocation and blinding**

46  
47  
48 228 At Visit 1, each patient is randomised into one of three equally sized groups (Figure 1) as described in  
49  
50 229 the *Study design*. Randomisation assignments are generated in advance in blocks of nine and stored  
51  
52 230 in a protected database. For each patient, anonymous codes for tubes containing either active study  
53  
54 231 microbiota mixture or placebo is received. Thus, the true assignment will remain concealed for the  
55  
56 232 patients and the study staff until the end of the study observation period. The Investigator is  
57  
58 233 encouraged to maintain the blind as far as possible. The actual allocation must not be disclosed to  
59  
60

1  
2  
3 234 the patient and/or other study personnel, including other site personnel, monitors, corporate  
4  
5 235 sponsors or project office staff; nor should there be any written or verbal disclosure of the code in  
6  
7 236 any of the corresponding patient documents.  
8  
9

10 237

### 11 238 **Study Intervention**

12  
13  
14 239 Study substance is administered during Visit 2+3 and then again 7+8 as a retention colon enema and  
15  
16 240 will be held optimally for at least 30 minutes. Bowel preparation is applied the day before the  
17  
18 241 intervention (prior to Visit 2 and Visit 7) (natrii picosulfas 10 milligrams, magnesi oxidum leve 3,5  
19  
20 242 grams, acidum citricum 12 grams). No preparation is performed before the second enema in the pair  
21  
22 243 (visits 3 and 8).  
23  
24  
25

26 244

27  
28 245 A rectal tube is inserted into the rectum, and the enema is applied. Application kit (Irrigator PN  
29  
30 246 0462/E/93, EriLens, Czechia) is used. After the enema is applied, the patient position is changed to  
31  
32 247 enable the study substance to be spread within the colon. The exact time of the enema completion is  
33  
34 248 recorded as well as the enema retention time.  
35  
36

37 249

### 38 39 250 **Outcomes**

40  
41 251 Primary outcome

42  
43  
44 252 The primary outcome is the change in the IBS severity symptom score (IBS-SSS) in the active  
45  
46 253 microbiota group relative to the placebo group. The change will be evaluated as the difference  
47  
48 254 between the score at four weeks after the intervention (study weeks 5 or 13, respectively, see **Figure**  
49  
50 255 **1**) and the baseline score (week -1 in group A or week 8 in group B).  
51  
52

53 256

54  
55  
56 257 Secondary outcomes  
57  
58  
59  
60

- 1  
2  
3 258 - The acute change in the IBS severity symptom score (IBS-SSS) between baseline and two weeks  
4  
5 259 after intervention (study weeks 3 and 11, respectively, see **Figure 1**).
- 6  
7 260 - The long-term change in the IBS severity symptom score (IBS-SSS) between baseline (week -1)  
8  
9 261 and week 32 (see **Figure 1**). The long term change will compare group C (placebo only) to  
10  
11 262 merged groups A+B (active study microbiota mixture).
- 12  
13  
14 263 - Changes due to the intervention in (a) frequency of urgent defecations, (b) Bristol stool scale, (c)  
15  
16 264 abdominal pain and bloating, (d) body weight, fat content, and other anthropometric parameters
- 17  
18 265 - The durability of changes (if any) in the microbial profiles by bacteriome profiling, parasite  
19  
20 266 screening, and virome sequencing
- 21  
22  
23 267 - The psychological and well-being effects of the therapy scored by IBS-QoL questionnaires
- 24  
25 268 - The long term effects of the therapy on stool frequency and consistency and on the gut  
26  
27 269 microbiome and statistically significant changes in anthropometric measurements.
- 28  
29  
30 270

## 31 32 271 **Data collection and follow-up**

### 33 34 272 Timing of assessments

35  
36  
37 273 At visit 1 (the randomization), the patient is given detailed instructions and thoroughly instructed by  
38  
39 274 the study team. The patients are asked to keep the identical type of diet throughout the observation.  
40  
41 275 They are asked to regularly (once a week) fill the study questionnaire. A study team member sends  
42  
43 276 that via the Survey Monkey smartphone application, an online survey development cloud-based  
44  
45 277 software. Relevant data are entered in a structured manner (frequency of defecation, Bristol stool  
46  
47 278 scale, pain measures, other symptoms, dietary records etc.). This member also frequently  
48  
49 279 communicate with study participants and answer any questions regarding the study to keep the  
50  
51 280 patient's adherence. An overview of the examinations at each visit and the timing of the study visits  
52  
53 281 could be seen in **Table 4**.

54  
55  
56  
57 282  
58  
59 283 Irritable bowel syndrome severity scale score (IBS-SSS).  
60



1  
2  
3 284 The IBS-SSS is a five-question survey that reflects 1) the severity of abdominal pain, 2) frequency of  
4  
5 285 abdominal pain, 3) severity of abdominal distention, 4) satisfaction with bowel habits, and 5)  
6  
7 286 interference with quality of life over the past ten days. Subjects respond to each question on a 100-  
8  
9  
10 287 point analogue scale ([8]); thus, the score can range from 0 to 500, with higher scores indicating  
11  
12 288 more severe symptoms.

13  
14 289  
15  
16 290 At eligibility screening, the patients are given instructions on how to fill the IBS-SSS questionnaires  
17  
18 291 (via the Survey Monkey application). The questionnaires are filled in at eligibility screening and then  
19  
20 292 at week -1, 3, 5 (before the first intervention, at the presumed peak of its effect, and after further  
21  
22 293 two weeks), then at weeks 8, 11, 13 (similarly with the second intervention), and finally at week 32.

23  
24  
25 294  
26  
27 295 Weight, height, bioimpedance  
28  
29  
30 296 Bodyweight, height and bioimpedance are examined during Visit 0, 1, 4, 5, 9 and 11. Medical Body  
31  
32 297 Composition Analyzer Seca mBCA 515, (Seca, Germany) is used to measure changes in body  
33  
34 298 composition (8-point bioelectric impedance analysis at a frequency of 5 - 50 kHz with a current of  
35  
36 299 100  $\mu$ A), scanning performed with three pairs of hand electrodes and two pairs of leg electrodes,  
37  
38 300 measurements performed with light clothing and without metal objects (jewellery, keys). The weight  
39  
40 301 is determined in patients wearing underwear using the Seca mBCA 515. The height is determined by  
41  
42 302 a standardised technique with a metal stadiometer with an accuracy of 1 mm. Seca analytics 115  
43  
44 303 software is used to analyse the obtained data (Seca, Hamburg, Germany ). The measurements is  
45  
46 304 performed according to the NIHR Southampton Biomedical Research Centre standard protocol (Seca  
47  
48 305 mBCA, NIHR Southampton Biomedical Research Centre, 2014).

49  
50  
51 306  
52  
53  
54 307 Detailed anthropometry  
55  
56  
57  
58  
59  
60

1  
2  
3 308 It is performed by nutritional therapists in Visit 1, 5, 10 and 11. It involves weight, abdominal (waist)  
4  
5 309 circumference, buttocks (hip) circumference, thigh circumference, skinfolds (thigh, triceps,  
6  
7 310 subscapular, suprailiacal).

9 311

10 312 Serum workup, archiving serum+plasma

11  
12 313 Blood is sampled at Visits 0, 4, 9, 11 and will include: A) serum+plasma archiving, B) serum workup.

13  
14 314 Laboratory panel testing will comprise sodium, potassium, chloride, urea, creatinine, glucose,

15  
16 315 calcium, phosphate, total protein and albumin, AST, ALT, ALP, GMT, bilirubin, lipid panel, HS-CRP,

17  
18 316 blood cell count with differential count, INR, urine analysis (sediment and biochemistry). One plasma

19  
20 317 and one serum aliquot are made at these visits and frozen for forensic reasons.

21  
22 318

23  
24 319 Psychological evaluation

25  
26 320 It is performed during Visit 0 and Visit 11 using a structured questionnaire evaluated by a qualified

27  
28 321 psychologist.

29  
30 322

31  
32 323 Dietary questionnaire & advice, evaluation of food records

33  
34 324 It is performed by nutritional therapists at Visit 4 and 9 and includes: evaluation of food records will

35  
36 325 include: overall daily energy intake, proteins, carbohydrates and lipids calculations and dietary fibre.

37  
38 326

39  
40 327 Gut microbiome composition

41  
42 328 Faecal samples are collected at home by the subjects in the same way described for donors above

43  
44 329 and at time points indicated in the sections above. If not immediately brought to the visit, the stool is

45  
46 330 frozen in a home freezer and then transported in a frozen tube container. DNA extraction is

47  
48 331 performed using the PowerSoil kit (Qiagen), and the bacteriome is characterised by 16S rDNA

49  
50 332 amplicon profiling using the tagged primers according to Schloss protocol [9], and sequencing on a

51  
52 333 MiSeq instrument with the 2x250 bases sequencing kit (both Illumina, USA).

1  
2  
3 334  
4  
5 335 The first steps of bioinformatic analysis will be performed in the DADA2 package[10]. Statistical  
6  
7 336 analyses and visualisation will be then performed in R with its Phyloseq package. Finally, the  
8  
9 337 functional potential of the bacteriome will be assessed using the PICRUST software, which predicts  
10  
11 338 functional capabilities based on the 16S rDNA profiles.  
12  
13

14 339  
15  
16 340 The virome is assessed in a total of four stool samples per patient at Visit 0, 4, 9 and 11. The aim of  
17  
18 341 this analysis is to assess the repertoire of major bacteriophages. The virome analysis is based on  
19  
20 342 metagenomic sequencing of total DNA from a virus-enriched stool sample, according to the  
21  
22 343 previously published protocol [11].  
23  
24

25 344  
26  
27 345 Finally, a simple PCR-based semi-quantitative parasite screening aims to identify several mostly  
28  
29 346 benign unicellular parasites (e.g. *Blastocystis*, *Dientamoeba*, *Entamoeba*, *Endolimax*).  
30  
31

32 347

### 34 348 **Safety monitoring**

36 349 The research team regularly monitors all data for any adverse events, and all potential adverse  
37  
38 350 events are recorded. Contacts to study coordinators active 24/7 are provided in case adverse effects  
39  
40 351 occurred. If any concerns are identified during donors or recipients' screening or clinical assessment,  
41  
42 352 further clinical evaluation and/or examination is immediately realised. All the concerns during the  
43  
44 353 study are assessed, and the recipient will be withdrawn if this is thought to be in his best interest. A  
45  
46 354 Data Monitoring and Safety Committee (DMSC) has been established and, based on the data from  
47  
48 355 the planned interim analysis, has the right to terminate the study if the frequency of severe adverse  
49  
50 356 events crosses the 5% line (for a closer description of DMSC, its responsibilities and premature  
51  
52 357 termination of the study see **Appendix 2**).  
53  
54

55 358

### 57 359 **Sample size and power calculation**

1  
2  
3 360 The study is powered to detect an absolute improvement of 62.5 points in IBS-SSS score over 8  
4  
5 361 weeks (which is 25% of the expected mean baseline score 250) between the active microbiota  
6  
7 362 intervention compared to placebo. With a sample size of 33 per group, the probability of detecting  
8  
9 363 such an improvement is at least 0.9. This calculation assumes 20% dropout rates, variance in IBS-SSS  
10  
11 364 scores 100 (see the results in [12]), a correlation between the final and baseline IBS-SSS scores 0  
12  
13 365 (with a positive correlation, the power is higher), and no carry-over or temporal effect.  
14  
15  
16  
17 366

### 18 367 **Data management**

19  
20  
21 368 Data from IBS-SSS, frequency of urgent defecations, Bristol stool scale, abdominal pain and bloating  
22  
23 369 are collected and stored via the application Survey Monkey. All anthropometric data are entered and  
24  
25 370 stored in password-protected platforms integrated within the hospital information system. Only the  
26  
27 371 researchers involved in the study have access to the final study dataset (IBS-SSS, frequency of urgent  
28  
29 372 defecations, Bristol stool scale, abdominal pain and bloating), which will be shared in an anonymised  
30  
31 373 form via the Zenodo repository. The only data in this manuscript are bacteriome data; their  
32  
33 374 anonymised form will be available on reasonable request.  
34  
35  
36  
37 375

### 38 376 **Statistical analyses**

39  
40  
41 377 The primary outcome analysis will be based on the difference in IBS-SSS scores over the second  
42  
43 378 treatment period (week 14 vs week 8) minus the change over the first treatment period (week 5 vs  
44  
45 379 week -1). This difference will be used as a response in a linear model, with intercept corresponding to  
46  
47 380 the temporal effect (seen in the placebo group C), an indicator of group A corresponding to the cross-  
48  
49 381 over effect (resulting from administration of placebo after active microbiota) and differences in  
50  
51 382 indicators for groups A and B modelling the effect of active microbiota. A robust sandwich estimator  
52  
53 383 of the variance matrix will be used to adjust for potentially unequal variances between the groups.  
54  
55 384 Analyses of secondary outcomes will proceed by similar methodology, comparing absolute or relative  
56  
57  
58  
59  
60

1  
2  
3 385 differences of the post-intervention measure of each outcome relative to its baseline value. The  
4  
5 386 CONSORT 2010 guidelines will be followed in reporting the main trial results.  
6  
7

8 387  
9

### 10 388 **Study status**

11  
12  
13 389 The study was registered at clinicaltrials.gov (NCT04899869) on May 25th 2021. The first patient was  
14  
15 390 recruited on June 17th 2021, and the first intervention was applied on July 29<sup>th</sup> 2021. As of August  
16  
17 391 19<sup>th</sup> 2021, 12 patients have signed the informed consent, and six interventions have been applied. It  
18  
19 392 is expected that the study will be completed in December 2022.  
20  
21

22 393  
23

### 24 394 **Patient and public involvement**

25  
26  
27 395 Information on the study has been spread at conferences, in newspapers and by local  
28  
29 396 gastroenterologists contacted by researchers. Everyone interested got information material, which  
30  
31 397 allowed the potential subjects to read about the study and reach the researchers if they wanted to  
32  
33 398 participate. Participants were not involved in the development, recruitment of other participants or  
34  
35 399 conduct of the study. All recipients are asked about any possible adverse effects of treatment at  
36  
37 400 regular visits planned according to **Figure 1**; a thorough investigation will be conducted if any occurs.  
38  
39 401 After completing the data analysis, all recipients will receive information about their results and be  
40  
41 402 offered a roll-over (receiving active study microbiota mixture).  
42  
43  
44

45 403  
46

### 47 404 **ETHICS AND DISSEMINATION**

48  
49  
50 405 Ethics approval for this study was granted in June 2018 by the Ethics Committee of the Institute for  
51  
52 406 Clinical and Experimental Medicine and Thomayer Hospital (Václavská 800, 140 59 Prague 4, Czech  
53  
54 407 Republic). Involvement in this study is completely voluntary; donors and recipients are required to  
55  
56 408 provide written informed consent prior to participation in the study (see **Appendix 3 and 4**).  
57  
58 409 Recipients and their caregivers are informed of unexpected findings or unrecognised conditions and  
59  
60

1  
2  
3 410 by possible future usage of their specimens in ancillary studies by trained physician or nurse; further  
4  
5 411 medical care will be arranged. Study donors received financial compensation to pay for the required  
6  
7 412 travelling costs when donating the stool. The patient will be offered a roll-over into an observational  
8  
9 413 study with the administration of active microbiota. The patients are informed of this option at the  
10  
11  
12 414 start of the study and regularly reminded.

13  
14  
15 415 We aim to publish findings in impact peer-reviewed international journals. Gastroenterologists,  
16  
17 416 internists and other care providers will be informed through the national conference meetings,  
18  
19 417 journals and patient groups meetings.

20  
21  
22  
23 418

24  
25  
26 419 **Protocol amendment number:** 01. Modification of the study protocol will be communicated with the  
27  
28 420 Ethics committee.

29  
30  
31 421 **Registration details** This study is registered with ClinicalTrials.gov (NCT04899869).

32  
33  
34 422 **Acknowledgement** We thank Peter Holger Johnsen, Linn Skjevling and Hege Hansen from University  
35  
36 423 Hospital of North Norway Harstad, Norway and Rasmus Goll from University Hospital of North  
37  
38 424 Norway Tromsø, Norway, for valuable advice regarding the study design and study microbiota  
39  
40 425 mixture preparation. We also thank Marcela Krutova, Jan Tkadlec, Daniela Lzicarova, Kamila  
41  
42 426 Dundrova, Marie Brajerova, Milena Antuskova, Barbora Dravotova, Jana Prasilova, Jana Sumova and  
43  
44 427 Ales Briksi all from Department of Medical microbiology, 2<sup>nd</sup> Faculty of Medicine, Charles University  
45  
46 428 and Motol University Hospital, Prague for their laboratory work in the regular microbiological  
47  
48 429 screening of the study donors.

49  
50  
51  
52  
53 430 **Contributors** OC, PK, JH, JV, MK contributed to the conception and design of the study. OC, PK, JH  
54  
55 431 and JV drafted the protocol with input from all other authors. JV and PK contributed to the patients  
56  
57 432 recruitment. JH, LV, LK and OC contributed to the microbiome analysis for donor selection. JH, OC  
58  
59 433 and JV contributed to the donor screening. LV, JH and OC contributed to the study microbiota  
60

1  
2  
3 434 mixture preparation. MK contributed to the power size calculations and statistical analysis. VL  
4  
5 435 contributed to the randomization. JH and JV contributed equally to this paper, OC and PK contributed  
6  
7 436 equally either.  
8  
9

10 437 **Funding** This research received funding from the Ministry of Health of the Czech Republic, grant Nr.  
11  
12 438 19-01-00127 . Funding received from this grant support direct research cost. All rights reserved. The  
13  
14 439 grant agency is responsible for auditing the trial.  
15  
16

17  
18 440 **Competing interests** None declared. No money from commercial sponsors was used.  
19  
20

21 441 **Patient consent for publication** Not required.  
22  
23

24 442 **Ethics approval** Ethics approval for this study was granted in June 2018 by the Ethics Committee of  
25  
26 443 the Institut for Clinical and Experimental Medicine and Thomayer Hospital (Víteňská 800, 140 59  
27  
28 444 Prague 4, Czech Republic).  
29  
30

31 445 **Provenance and peer review** Not commissioned; externally peer-reviewed.  
32  
33

34 446 **Open Access** This is an open access article distributed in accordance with the Creative Commons  
35  
36 447 Attribution Non Commercial (CC BY-NC 4.0) license, which permits others to distribute, remix, adapt,  
37  
38 448 build upon this work non-commercially, and license their derivative works on different terms,  
39  
40 449 provided the original work is properly cited, appropriate credit is given, any changes made indicated,  
41  
42 450 and the use is non-commercial. See: <http://creativecommons.org/licenses/by-nc/4.0/>.  
43  
44  
45  
46  
47  
48  
49  
50  
51  
52  
53  
54  
55  
56  
57  
58  
59  
60

1  
2  
3 451 **FIGURES AND ILLUSTRATIONS**

4 452 **Figure 1** Per protocol intervention scheme: the visits, questionnaires and samples  
5  
6  
7  
8  
9  
10  
11  
12  
13  
14  
15  
16  
17  
18  
19  
20  
21  
22  
23  
24  
25  
26  
27  
28  
29  
30  
31  
32  
33  
34  
35  
36  
37  
38  
39  
40  
41  
42  
43  
44  
45  
46  
47  
48  
49  
50  
51  
52  
53  
54  
55  
56  
57  
58  
59  
60

For peer review only



1  
2  
3 **453** **Figure 2** Ordination plot on the weighted Unifrac distance at the genus level for selection of the  
4 **454** donor candidates based on their gut microbiome alpha- and beta-diversity  
5  
6 **455**

7 **456** These are the results of a comparative microbiome case-control study that helped us to preselect 14 donor candidates.  
8 **457** Alpha diversity calculation was based on Chao 1 index. The beta-diversity calculation was based on non-metric dimensional  
9 **458** scaling (NMDS) with a weighted UniFrac distance matrix for bacterial Genus. NMDS axis 1 captured 46.8% of variability;  
10 **459** NMDS axis 2 represents 14.7% of the variability. Healthy subjects were enriched in negative values of the first ordination  
11 **460** axis; therefore, we selected donors among healthy subjects in this half of the graph and based on their microbiome's alpha  
12 **461** diversity. The reason for concentrating healthy and enriched subjects in the left part of the plot could be their younger age.  
13  
14  
15  
16  
17  
18  
19  
20  
21  
22  
23  
24  
25  
26  
27  
28  
29  
30  
31  
32  
33  
34  
35  
36  
37  
38  
39  
40  
41  
42  
43  
44  
45  
46  
47  
48  
49  
50  
51  
52  
53  
54  
55  
56  
57  
58  
59  
60

For peer review only

1  
2  
3 463 **Figure 3** Process of donor selection and reasons for their excluding  
4  
5  
6  
7  
8  
9  
10  
11  
12  
13  
14  
15  
16  
17  
18  
19  
20  
21  
22  
23  
24  
25  
26  
27  
28  
29  
30  
31  
32  
33  
34  
35  
36  
37  
38  
39  
40  
41  
42  
43  
44  
45  
46  
47  
48  
49  
50  
51  
52  
53  
54  
55  
56  
57  
58  
59  
60

For peer review only

464 **Table 1.** Inclusion and exclusion criteria for FMT donors

|                  |                                                                                                                                                                                                                                                              |
|------------------|--------------------------------------------------------------------------------------------------------------------------------------------------------------------------------------------------------------------------------------------------------------|
| <b>Inclusion</b> | Adults aged 18-65 years                                                                                                                                                                                                                                      |
|                  | BMI 18,5-27 kg/m <sup>2</sup>                                                                                                                                                                                                                                |
|                  | Lack of restrictive diets (diet discussed with experienced gastroenterologist)                                                                                                                                                                               |
|                  | Bristol stool scale usually between 3 and 4                                                                                                                                                                                                                  |
|                  | High alpha diversity and significant difference in beta-diversity from patients (using 16S rDNA sequencing)                                                                                                                                                  |
|                  | Expected to donate regularly                                                                                                                                                                                                                                 |
|                  | Consented in writing                                                                                                                                                                                                                                         |
| <b>Exclusion</b> | Any chronic GI disease in patient's history (coeliac disease, inflammatory bowel disease, irritable bowel syndrome, colorectal carcinoma), or active acute GI issues (infectious gastroenteritis or enterocolitis, frequent bloating, diarrhoea or vomiting) |
|                  | Chronic disease in ' 'patient's history (cancer, autoimmune conditions, type 2 diabetes mellitus, coronary heart disease, hypertension, hypercholesterolemia, gout)                                                                                          |
|                  | <i>Clostridiodes difficile</i> infection in patient's history                                                                                                                                                                                                |
|                  | Colorectal carcinoma in family history                                                                                                                                                                                                                       |
|                  | Any restrictive diet habits (raw-vegans, fruitarians, keto or carnivore)                                                                                                                                                                                     |
|                  | Any systemic antibiotics in the last 6 months                                                                                                                                                                                                                |
|                  | Using proton-pump inhibitors in the last 6 months                                                                                                                                                                                                            |
|                  | Regular unprotected sex with unknown persons                                                                                                                                                                                                                 |

465

466 **Table 2** Laboratory screening of the FMT donors

| <b>Blood testing</b>                                                                                                                                                                                                    |  |
|-------------------------------------------------------------------------------------------------------------------------------------------------------------------------------------------------------------------------|--|
| Hepatitis A, hepatitis B, hepatitis C and hepatitis E viruses (serology)                                                                                                                                                |  |
| HIV-1 and HIV-2 (p24 antigen)                                                                                                                                                                                           |  |
| Treponema pallidum (serology)                                                                                                                                                                                           |  |
| Strongyloides stercoralis (serology)                                                                                                                                                                                    |  |
| Complete blood cell count with differential                                                                                                                                                                             |  |
| Creatinine, aminotransferases, bilirubin                                                                                                                                                                                |  |
| <b>Stool testing</b>                                                                                                                                                                                                    |  |
| <i>Clostridioides difficile</i> (cultures, antigen testing)                                                                                                                                                             |  |
| Common enteric pathogens, including Salmonella, Shigella, Campylobacter, shiga toxin-producing <i>Escherichia coli</i> , Yersinia and <i>Vibrio cholerae</i> (cultures)                                                 |  |
| Antibiotic-resistant bacteria (ARB), including vancomycin-resistant Enterococci, methicillin-resistant <i>Staphylococcus aureus</i>                                                                                     |  |
| Gram-negative ARB including extended-spectrum $\beta$ -lactamase-producing <i>Enterobacteriaceae</i> , and carbapenem-resistant <i>Enterobacteriaceae</i> /carbapenemase-producing <i>Enterobacteriaceae</i> (cultures) |  |
| Norovirus, rotavirus, adenovirus, sapovirus (PCR)                                                                                                                                                                       |  |
| SARS-CoV-2 (reverse transcription -PCR)                                                                                                                                                                                 |  |
| Common intestinal parasites, including <i>Giardia intestinalis</i> , <i>Cryptosporidium parvum et hominis</i> (cultures and PCR), <i>Blastocystis hominis</i> *, <i>Dientamoeba fragilis</i> * (both PCR only)          |  |

467

468 \*) Based on the literature [13], we decided to test both parasites but do not exclude the donors if they tested  
 469 positive and having no gastrointestinal symptoms. *Blastocystis* is believed to be commensal of the gut.  
 470 *Dientamoeba's* status is not exact; however, based on our experiment, it does not survive freezing at -80 °C and  
 471 thawing to 5°C when mixing the study microbiota mixture. Therefore it can't do any harm.

472

473 The screening strategy is based on [8].

474 **Table 3.** Inclusion and exclusion criteria for recipients of FMT

|           |                                                                                                                                                           |
|-----------|-----------------------------------------------------------------------------------------------------------------------------------------------------------|
| Inclusion | Adults 18-65 years                                                                                                                                        |
|           | Diagnosed with IBS-D or IBS-M according to the Rome IV criteria                                                                                           |
|           | Expected adherence to following the protocol                                                                                                              |
|           | Written consent to the study                                                                                                                              |
| Exclusion | The use of antibiotics and probiotics within one month prior to faecal microbiota transplantation                                                         |
|           | History of inflammatory bowel disease or gastrointestinal malignancy, systemic autoimmune diseases (ongoing or in history)                                |
|           | Previous abdominal surgery (other than appendectomy or cholecystectomy or hernioplasty or cesarean section)                                               |
|           | HIV infection or other active infection                                                                                                                   |
|           | Renal or hepatic disease (both defined by biochemistry workup)                                                                                            |
|           | Diabetes mellitus, abnormal thyroid functions not controlled by thyroid medications                                                                       |
|           | Bipolar disorder or schizophrenia (ongoing or history thereof), moderately severe depression defined by Patient Health Questionnaire-9 (PHQ-9) score > 15 |
|           | Anxiety defined by a Generalised Anxiety Disorder 7 (GAD7) score > 10, with any organic causes that can explain the symptoms of IBS                       |
|           | Current pregnancy and lactation                                                                                                                           |

475

476 **Table 4.** The study visits with planned activities

| Visit                                                                                   | 0 | 1  | X  | 2+3 | 4 | X | 5 | 6 | 7+8 | 9  | X  | 10 | 11 |
|-----------------------------------------------------------------------------------------|---|----|----|-----|---|---|---|---|-----|----|----|----|----|
| <b>Study Week</b>                                                                       | ? | -2 | -1 | 1   | 2 | 3 | 5 | 8 | 9   | 10 | 11 | 13 | 32 |
| Eligibility evaluation (E) /<br>Randomization (R) /<br>Wrap-up visit (W) <sup>(1)</sup> | E | R  |    |     |   |   |   |   |     |    |    |    | W  |
| Colon enema with the<br>study substance (active<br>microbiota or placebo)               |   |    |    | XX  |   |   |   |   | XX  |    |    |    |    |
| Irritable bowel syndrome<br>severity scale score                                        |   | X  | X  |     |   | X | X | X |     |    | X  | X  | X  |
| Weight, height,<br>bioimpedance                                                         |   | X  |    |     | X |   | X |   |     | X  |    | X  | X  |
| Detailed anthropometry                                                                  |   | X  |    |     |   |   | X |   |     |    |    | X  | X  |
| Serum workup, archiving<br>serum+plasma                                                 |   | X  |    |     | X |   |   |   |     | X  |    |    | X  |
| Psychological evaluation                                                                |   | X  |    |     |   |   |   |   |     |    |    |    | X  |
| Dietary questionnaire &<br>advice, evaluation of<br>food records <sup>(2)</sup>         |   |    |    |     | X |   |   |   |     | X  |    |    |    |
| Stool samples for<br>bacteriome profiling<br>using 16S rDNA<br>sequencing               | X | X  | X  |     | X | X | X | X |     | X  | X  | X  | X  |

477 (1) Here, the patient is offered a roll-over into an observational study with active microbiota administration. The patients  
478 will be informed of this option at the start of the study and regularly reminded.

479 (2) For IBS-SSS questionnaires assessing the primary outcome, please see the intervention scheme in Figure 2. Their  
480 administering is not linked to study visits.

481 **REFERENCES**

- 482 1. Lacy BE, Mearin F, Chang L, et al. Bowel disorders. *Gastroenterology*. 2016;150(6):1393-1407.
- 483 2. Lovell RM, Ford AC. Global Prevalence of and Risk Factors for Irritable Bowel Syndrome: A  
484 Meta-analysis. *Clin Gastroenterol Hepatol*. 2012;10(7):712-721.
- 485 3. Rajilić-Stojanović M, Jonkers DM, Salonen A, et al. Intestinal Microbiota And Diet in IBS:  
486 Causes, Consequences, or Epiphenomena? *Am J Gastroenterol*. 2015;110(2):278-287.
- 487 4. Kelly CP. Fecal Microbiota Transplantation — An Old Therapy Comes of Age. *N Engl J Med*.  
488 2013;368(5):474-475.
- 489 5. Johnsen PH, Hilpüsch F, Cavanagh JP, et al. Faecal microbiota transplantation versus placebo  
490 for moderate-to-severe irritable bowel syndrome: a double-blind, randomised, placebo-  
491 controlled, parallel-group, single-centre trial. *Lancet Gastroenterol Hepatol*. 2018;3(1):17-24.
- 492 6. Chan AW, Tetzlaff JM, Altman DG, et al. SPIRIT 2013 statement: Defining standard protocol  
493 items for clinical trials. *Ann Intern Med*. 2013;158(3):200-207.
- 494 7. Cammarota G, Ianiro G, Kelly CR, et al. International consensus conference on stool banking  
495 for faecal microbiota transplantation in clinical practice. *Gut*. 2019;68(12):2111-2121.
- 496 8. Francis CY, Morris J, Whorwell PJ. The irritable bowel severity scoring system: A simple  
497 method of monitoring irritable bowel syndrome and its progress. *Aliment Pharmacol Ther*.  
498 1997;11(2):395-402.
- 499 9. Kozich JJ, Westcott SL, Baxter NT, Highlander SK, Schloss PD. Development of a dual-index  
500 sequencing strategy and curation pipeline for analysing amplicon sequence data on the miseq  
501 illumina sequencing platform. *Appl Environ Microbiol*. 2013;79(17):5112-5120.
- 502 10. Callahan BJ, McMurdie PJ, Rosen MJ, Han AW, Johnson AJA, Holmes SP. DADA2: High-  
503 resolution sample inference from Illumina amplicon data. *Nat Methods*. 2016;13(7):581-583.
- 504 11. Kramná L, Cinek O. Virome sequencing of stool samples. In: *Methods in Molecular Biology*. Vol  
505 1838. Humana Press Inc.; 2018:59-83.
- 506 12. Palsson OS, Baggish JS, Turner MJ, Whitehead WE. IBS patients show frequent fluctuations  
507 between loose/watery and hard/lumpy stools: Implications for treatment. *Am J Gastroenterol*.  
508 2012;107(2):286-295.
- 509 13. Stensvold CR, van der Giezen M. Associations between Gut Microbiota and Common Luminal  
510 Intestinal Parasites. *Trends Parasitol*. 2018;34(5):369-377.

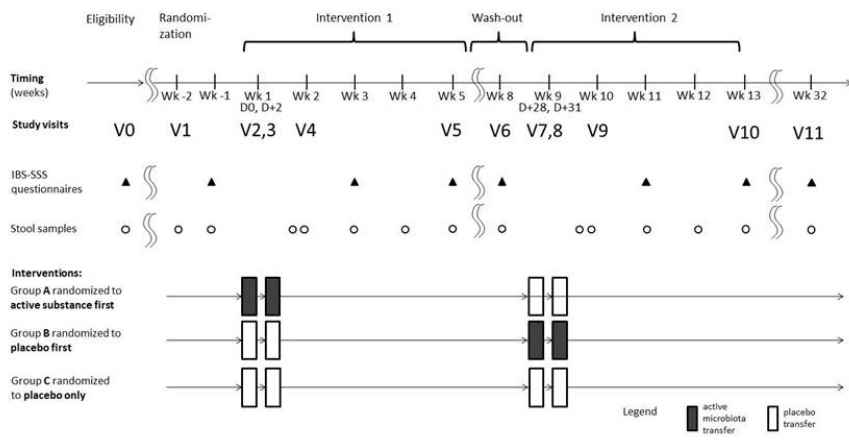

Per protocol intervention scheme: the visits, questionnaires and samples

254x190mm (96 x 96 DPI)



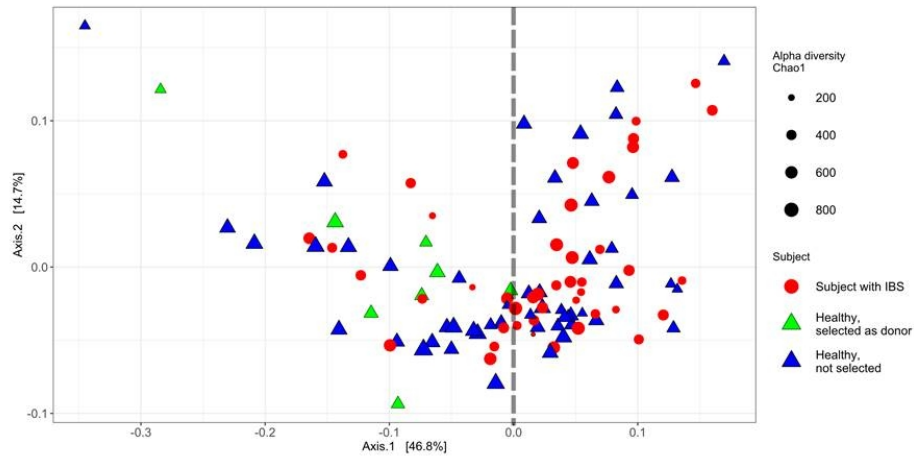

Ordination plot on the weighted UniFrac distance at the genus level for selection of the donor candidates based on their gut microbiome alpha- and beta-diversity. These are the results of a comparative microbiome case-control study that helped us to preselect 14 donor candidates. Alpha diversity calculation was based on Chao 1 index. The beta-diversity calculation was based on non-metric dimensional scaling (NMDS) with a weighted UniFrac distance matrix for bacterial Genus. NMDS axis 1 captured 46.8% of variability; NMDS axis 2 represents 14.7% of the variability. Healthy subjects were enriched in negative values of the first ordination axis; therefore, we selected donors among healthy subjects in this half of the graph and based on their microbiome's alpha diversity. The reason for concentrating healthy and enriched subjects in the left part of the plot could be their younger age.

254x190mm (96 x 96 DPI)

1  
2  
3  
4  
5  
6  
7  
8  
9  
10  
11  
12  
13  
14  
15  
16  
17  
18  
19  
20  
21  
22  
23  
24  
25  
26  
27  
28  
29  
30  
31  
32  
33  
34  
35  
36  
37  
38  
39  
40  
41  
42  
43  
44  
45  
46  
47  
48  
49  
50  
51  
52  
53  
54  
55  
56  
57  
58  
59  
60

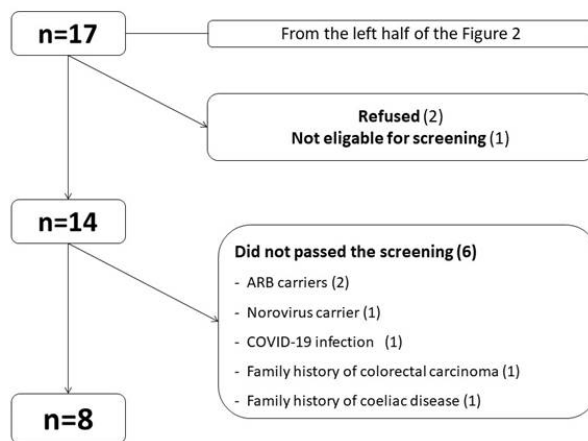

Process of donor selection and reasons for their excluding

254x190mm (96 x 96 DPI)

# Reporting checklist for protocol of a clinical trial.

Based on the SPIRIT guidelines.

## Appendix 1 SPIRIT CHECKLIST

|                                                         |                     | Reporting Item                                                                                                                                                                                                                                                                           | Page Number            |
|---------------------------------------------------------|---------------------|------------------------------------------------------------------------------------------------------------------------------------------------------------------------------------------------------------------------------------------------------------------------------------------|------------------------|
| <b>Administrative information</b>                       |                     |                                                                                                                                                                                                                                                                                          |                        |
| Title                                                   | <a href="#">#1</a>  | Descriptive title identifying the study design, population, interventions, and, if applicable, trial acronym                                                                                                                                                                             | 1                      |
| Trial registration                                      | <a href="#">#2a</a> | Trial identifier and registry name. If not yet registered, name of intended registry                                                                                                                                                                                                     | 6 and 19               |
| Trial registration: data set                            | <a href="#">#2b</a> | All items from the World Health Organization Trial Registration Data Set                                                                                                                                                                                                                 | NA – not received yet. |
| Protocol version                                        | <a href="#">#3</a>  | Date and version identifier                                                                                                                                                                                                                                                              | 19                     |
| Funding                                                 | <a href="#">#4</a>  | Sources and types of financial, material, and other support                                                                                                                                                                                                                              | 20                     |
| Roles and responsibilities: contributorship             | <a href="#">#5a</a> | Names, affiliations, and roles of protocol contributors                                                                                                                                                                                                                                  | 20                     |
| Roles and responsibilities: sponsor contact information | <a href="#">#5b</a> | Name and contact information for the trial sponsor                                                                                                                                                                                                                                       | 20                     |
| Roles and responsibilities: sponsor and funder          | <a href="#">#5c</a> | Role of study sponsor and funders, if any, in study design; collection, management, analysis, and interpretation of data; writing of the report; and the decision to submit the report for publication, including whether they will have ultimate authority over any of these activities | 20                     |

|    |                           |                      |                                                              |    |
|----|---------------------------|----------------------|--------------------------------------------------------------|----|
| 1  | Roles and                 | <a href="#">#5d</a>  | Composition, roles, and responsibilities of the              | 20 |
| 2  | responsibilities:         |                      | coordinating centre, steering committee, endpoint            |    |
| 3  | committees                |                      | adjudication committee, data management team, and            |    |
| 4  |                           |                      | other individuals or groups overseeing the trial, if         |    |
| 5  |                           |                      | applicable (see Item 21a for data monitoring committee)      |    |
| 6  |                           |                      |                                                              |    |
| 7  |                           |                      |                                                              |    |
| 8  |                           |                      |                                                              |    |
| 9  | <b>Introduction</b>       |                      |                                                              |    |
| 10 |                           |                      |                                                              |    |
| 11 | Background and            | <a href="#">#6a</a>  | Description of research question and justification for       | 7  |
| 12 | rationale                 |                      | undertaking the trial, including summary of relevant         |    |
| 13 |                           |                      | studies (published and unpublished) examining benefits       |    |
| 14 |                           |                      | and harms for each intervention                              |    |
| 15 |                           |                      |                                                              |    |
| 16 |                           |                      |                                                              |    |
| 17 |                           |                      |                                                              |    |
| 18 | Background and            | <a href="#">#6b</a>  | Explanation for choice of comparators                        | 8  |
| 19 | rationale: choice of      |                      |                                                              |    |
| 20 | comparators               |                      |                                                              |    |
| 21 |                           |                      |                                                              |    |
| 22 |                           |                      |                                                              |    |
| 23 | Objectives                | <a href="#">#7</a>   | Specific objectives or hypotheses                            | 8  |
| 24 |                           |                      |                                                              |    |
| 25 |                           |                      |                                                              |    |
| 26 | Trial design              | <a href="#">#8</a>   | Description of trial design including type of trial (eg,     | 9  |
| 27 |                           |                      | parallel group, crossover, factorial, single group),         |    |
| 28 |                           |                      | allocation ratio, and framework (eg, superiority,            |    |
| 29 |                           |                      | equivalence, non-inferiority, exploratory)                   |    |
| 30 |                           |                      |                                                              |    |
| 31 |                           |                      |                                                              |    |
| 32 |                           |                      |                                                              |    |
| 33 | <b>Methods:</b>           |                      |                                                              |    |
| 34 | <b>Participants,</b>      |                      |                                                              |    |
| 35 | <b>interventions, and</b> |                      |                                                              |    |
| 36 | <b>outcomes</b>           |                      |                                                              |    |
| 37 |                           |                      |                                                              |    |
| 38 |                           |                      |                                                              |    |
| 39 | Study setting             | <a href="#">#9</a>   | Description of study settings (eg, community clinic,         | 10 |
| 40 |                           |                      | academic hospital) and list of countries where data will     |    |
| 41 |                           |                      | be collected. Reference to where list of study sites can     |    |
| 42 |                           |                      | be obtained                                                  |    |
| 43 |                           |                      |                                                              |    |
| 44 |                           |                      |                                                              |    |
| 45 |                           |                      |                                                              |    |
| 46 | Eligibility criteria      | <a href="#">#10</a>  | Inclusion and exclusion criteria for participants. If        | 10 |
| 47 |                           |                      | applicable, eligibility criteria for study centres and       |    |
| 48 |                           |                      | individuals who will perform the interventions (eg,          |    |
| 49 |                           |                      | surgeons, psychotherapists)                                  |    |
| 50 |                           |                      |                                                              |    |
| 51 |                           |                      |                                                              |    |
| 52 |                           |                      |                                                              |    |
| 53 | Interventions:            | <a href="#">#11a</a> | Interventions for each group with sufficient detail to allow | 13 |
| 54 | description               |                      | replication, including how and when they will be             |    |
| 55 |                           |                      | administered                                                 |    |
| 56 |                           |                      |                                                              |    |
| 57 |                           |                      |                                                              |    |
| 58 |                           |                      |                                                              |    |
| 59 | Interventions:            | <a href="#">#11b</a> | Criteria for discontinuing or modifying allocated            | 13 |
| 60 |                           |                      |                                                              |    |

|    |                           |                      |                                                            |            |
|----|---------------------------|----------------------|------------------------------------------------------------|------------|
| 1  | modifications             |                      | interventions for a given trial participant (eg, drug dose |            |
| 2  |                           |                      | change in response to harms, participant request, or       |            |
| 3  |                           |                      | improving / worsening disease)                             |            |
| 4  |                           |                      |                                                            |            |
| 5  | Interventions:            | <a href="#">#11c</a> | Strategies to improve adherence to intervention            | 14         |
| 6  | adherence                 |                      | protocols, and any procedures for monitoring adherence     |            |
| 7  |                           |                      | (eg, drug tablet return; laboratory tests)                 |            |
| 8  |                           |                      |                                                            |            |
| 9  |                           |                      |                                                            |            |
| 10 | Interventions:            | <a href="#">#11d</a> | Relevant concomitant care and interventions that are       | 14         |
| 11 | concomitant care          |                      | permitted or prohibited during the trial                   |            |
| 12 |                           |                      |                                                            |            |
| 13 |                           |                      |                                                            |            |
| 14 | Outcomes                  | <a href="#">#12</a>  | Primary, secondary, and other outcomes, including the      | 13         |
| 15 |                           |                      | specific measurement variable (eg, systolic blood          |            |
| 16 |                           |                      | pressure), analysis metric (eg, change from baseline,      |            |
| 17 |                           |                      | final value, time to event), method of aggregation (eg,    |            |
| 18 |                           |                      | median, proportion), and time point for each outcome.      |            |
| 19 |                           |                      | Explanation of the clinical relevance of chosen efficacy   |            |
| 20 |                           |                      | and harm outcomes is strongly recommended                  |            |
| 21 |                           |                      |                                                            |            |
| 22 |                           |                      |                                                            |            |
| 23 |                           |                      |                                                            |            |
| 24 |                           |                      |                                                            |            |
| 25 |                           |                      |                                                            |            |
| 26 | Participant timeline      | <a href="#">#13</a>  | Time schedule of enrolment, interventions (including any   | See Figure |
| 27 |                           |                      | run-ins and washouts), assessments, and visits for         | 1          |
| 28 |                           |                      | participants. A schematic diagram is highly                |            |
| 29 |                           |                      | recommended (see Figure)                                   |            |
| 30 |                           |                      |                                                            |            |
| 31 |                           |                      |                                                            |            |
| 32 |                           |                      |                                                            |            |
| 33 | Sample size               | <a href="#">#14</a>  | Estimated number of participants needed to achieve         | 17         |
| 34 |                           |                      | study objectives and how it was determined, including      |            |
| 35 |                           |                      | clinical and statistical assumptions supporting any        |            |
| 36 |                           |                      | sample size calculations                                   |            |
| 37 |                           |                      |                                                            |            |
| 38 |                           |                      |                                                            |            |
| 39 |                           |                      |                                                            |            |
| 40 | Recruitment               | <a href="#">#15</a>  | Strategies for achieving adequate participant enrolment    | 11         |
| 41 |                           |                      | to reach target sample size                                |            |
| 42 |                           |                      |                                                            |            |
| 43 | <b>Methods:</b>           |                      |                                                            |            |
| 44 | <b>Assignment of</b>      |                      |                                                            |            |
| 45 | <b>interventions (for</b> |                      |                                                            |            |
| 46 | <b>controlled trials)</b> |                      |                                                            |            |
| 47 |                           |                      |                                                            |            |
| 48 |                           |                      |                                                            |            |
| 49 |                           |                      |                                                            |            |
| 50 | Allocation: sequence      | <a href="#">#16a</a> | Method of generating the allocation sequence (eg,          | 12         |
| 51 | generation                |                      | computer-generated random numbers), and list of any        |            |
| 52 |                           |                      | factors for stratification. To reduce predictability of a  |            |
| 53 |                           |                      | random sequence, details of any planned restriction (eg,   |            |
| 54 |                           |                      | blocking) should be provided in a separate document        |            |
| 55 |                           |                      | that is unavailable to those who enrol participants or     |            |
| 56 |                           |                      |                                                            |            |
| 57 |                           |                      |                                                            |            |
| 58 |                           |                      |                                                            |            |
| 59 |                           |                      |                                                            |            |
| 60 |                           |                      |                                                            |            |

assign interventions

|    |                        |                      |                                                             |
|----|------------------------|----------------------|-------------------------------------------------------------|
| 1  |                        |                      |                                                             |
| 2  |                        |                      |                                                             |
| 3  | Allocation             | <a href="#">#16b</a> | Mechanism of implementing the allocation sequence           |
| 4  | concealment            |                      | (eg, central telephone; sequentially numbered, opaque,      |
| 5  | mechanism              |                      | sealed envelopes), describing any steps to conceal the      |
| 6  |                        |                      | sequence until interventions are assigned                   |
| 7  |                        |                      |                                                             |
| 8  |                        |                      |                                                             |
| 9  | Allocation:            | <a href="#">#16c</a> | Who will generate the allocation sequence, who will         |
| 10 | implementation         |                      | enrol participants, and who will assign participants to     |
| 11 |                        |                      | interventions                                               |
| 12 |                        |                      |                                                             |
| 13 |                        |                      |                                                             |
| 14 | Blinding (masking)     | <a href="#">#17a</a> | Who will be blinded after assignment to interventions       |
| 15 |                        |                      | (eg, trial participants, care providers, outcome            |
| 16 |                        |                      | assessors, data analysts), and how                          |
| 17 |                        |                      |                                                             |
| 18 |                        |                      |                                                             |
| 19 |                        |                      |                                                             |
| 20 | Blinding (masking):    | <a href="#">#17b</a> | If blinded, circumstances under which unblinding is         |
| 21 | emergency unblinding   |                      | permissible, and procedure for revealing a participant's    |
| 22 |                        |                      | allocated intervention during the trial                     |
| 23 |                        |                      |                                                             |
| 24 |                        |                      |                                                             |
| 25 | <b>Methods: Data</b>   |                      |                                                             |
| 26 | <b>collection,</b>     |                      |                                                             |
| 27 | <b>management, and</b> |                      |                                                             |
| 28 | <b>analysis</b>        |                      |                                                             |
| 29 |                        |                      |                                                             |
| 30 |                        |                      |                                                             |
| 31 |                        |                      |                                                             |
| 32 | Data collection plan   | <a href="#">#18a</a> | Plans for assessment and collection of outcome,             |
| 33 |                        |                      | baseline, and other trial data, including any related       |
| 34 |                        |                      | processes to promote data quality (eg, duplicate            |
| 35 |                        |                      | measurements, training of assessors) and a description      |
| 36 |                        |                      | of study instruments (eg, questionnaires, laboratory        |
| 37 |                        |                      | tests) along with their reliability and validity, if known. |
| 38 |                        |                      | Reference to where data collection forms can be found,      |
| 39 |                        |                      | if not in the protocol                                      |
| 40 |                        |                      |                                                             |
| 41 |                        |                      |                                                             |
| 42 |                        |                      |                                                             |
| 43 |                        |                      |                                                             |
| 44 |                        |                      |                                                             |
| 45 | Data collection plan:  | <a href="#">#18b</a> | Plans to promote participant retention and complete         |
| 46 | retention              |                      | follow-up, including list of any outcome data to be         |
| 47 |                        |                      | collected for participants who discontinue or deviate       |
| 48 |                        |                      | from intervention protocols                                 |
| 49 |                        |                      |                                                             |
| 50 |                        |                      |                                                             |
| 51 |                        |                      |                                                             |
| 52 | Data management        | <a href="#">#19</a>  | Plans for data entry, coding, security, and storage,        |
| 53 |                        |                      | including any related processes to promote data quality     |
| 54 |                        |                      | (eg, double data entry; range checks for data values).      |
| 55 |                        |                      | Reference to where details of data management               |
| 56 |                        |                      | procedures can be found, if not in the protocol             |
| 57 |                        |                      |                                                             |
| 58 |                        |                      |                                                             |
| 59 |                        |                      |                                                             |
| 60 |                        |                      |                                                             |

|    |                            |                      |                                                              |          |
|----|----------------------------|----------------------|--------------------------------------------------------------|----------|
| 1  | Statistics: outcomes       | <a href="#">#20a</a> | Statistical methods for analysing primary and secondary      | 18       |
| 2  |                            |                      | outcomes. Reference to where other details of the            |          |
| 3  |                            |                      | statistical analysis plan can be found, if not in the        |          |
| 4  |                            |                      | protocol                                                     |          |
| 5  |                            |                      |                                                              |          |
| 6  |                            |                      |                                                              |          |
| 7  |                            |                      |                                                              |          |
| 8  | Statistics: additional     | <a href="#">#20b</a> | Methods for any additional analyses (eg, subgroup and        | 18       |
| 9  | analyses                   |                      | adjusted analyses)                                           |          |
| 10 |                            |                      |                                                              |          |
| 11 | Statistics: analysis       | <a href="#">#20c</a> | Definition of analysis population relating to protocol non-  | 18       |
| 12 | population and             |                      | adherence (eg, as randomised analysis), and any              |          |
| 13 | missing data               |                      | statistical methods to handle missing data (eg, multiple     |          |
| 14 |                            |                      | imputation)                                                  |          |
| 15 |                            |                      |                                                              |          |
| 16 |                            |                      |                                                              |          |
| 17 |                            |                      |                                                              |          |
| 18 | <b>Methods: Monitoring</b> |                      |                                                              |          |
| 19 |                            |                      |                                                              |          |
| 20 |                            |                      |                                                              |          |
| 21 | Data monitoring:           | <a href="#">#21a</a> | Composition of data monitoring committee (DMC);              | Appendix |
| 22 | formal committee           |                      | summary of its role and reporting structure; statement of    | 1        |
| 23 |                            |                      | whether it is independent from the sponsor and               |          |
| 24 |                            |                      | competing interests; and reference to where further          |          |
| 25 |                            |                      | details about its charter can be found, if not in the        |          |
| 26 |                            |                      | protocol. Alternatively, an explanation of why a DMC is      |          |
| 27 |                            |                      | not needed                                                   |          |
| 28 |                            |                      |                                                              |          |
| 29 |                            |                      |                                                              |          |
| 30 |                            |                      |                                                              |          |
| 31 |                            |                      |                                                              |          |
| 32 | Data monitoring:           | <a href="#">#21b</a> | Description of any interim analyses and stopping             | Appendix |
| 33 | interim analysis           |                      | guidelines, including who will have Access to these          | 1        |
| 34 |                            |                      | interim results and make the final decision to terminate     |          |
| 35 |                            |                      | the trial                                                    |          |
| 36 |                            |                      |                                                              |          |
| 37 |                            |                      |                                                              |          |
| 38 |                            |                      |                                                              |          |
| 39 | Harms                      | <a href="#">#22</a>  | Plans for collecting, assessing, reporting, and managing     | 17       |
| 40 |                            |                      | solicited and spontaneously reported adverse events          |          |
| 41 |                            |                      | and other unintended effects of trial interventions or trial |          |
| 42 |                            |                      | conduct                                                      |          |
| 43 |                            |                      |                                                              |          |
| 44 |                            |                      |                                                              |          |
| 45 |                            |                      |                                                              |          |
| 46 | Auditing                   | <a href="#">#23</a>  | Frequency and procedures for auditing trial conduct, if      | 20       |
| 47 |                            |                      | any, and whether the process will be independent from        |          |
| 48 |                            |                      | investigators and the sponsor                                |          |
| 49 |                            |                      |                                                              |          |
| 50 |                            |                      |                                                              |          |
| 51 | <b>Ethics and</b>          |                      |                                                              |          |
| 52 | <b>dissemination</b>       |                      |                                                              |          |
| 53 |                            |                      |                                                              |          |
| 54 |                            |                      |                                                              |          |
| 55 | Research ethics            | <a href="#">#24</a>  | Plans for seeking research ethics committee /                | 19       |
| 56 | approval                   |                      | institutional review board (REC / IRB) approval              |          |
| 57 |                            |                      |                                                              |          |
| 58 |                            |                      |                                                              |          |
| 59 | Protocol amendments        | <a href="#">#25</a>  | Plans for communicating important protocol                   | 20       |
| 60 |                            |                      |                                                              |          |

modifications (eg, changes to eligibility criteria, outcomes, analyses) to relevant parties (eg, investigators, REC / IRBs, trial participants, trial registries, journals, regulators)

|    |                          |                      |                                                               |
|----|--------------------------|----------------------|---------------------------------------------------------------|
| 1  |                          |                      |                                                               |
| 2  |                          |                      |                                                               |
| 3  |                          |                      |                                                               |
| 4  |                          |                      |                                                               |
| 5  |                          |                      |                                                               |
| 6  |                          |                      |                                                               |
| 7  | Consent or assent        | <a href="#">#26a</a> | Who will obtain informed consent or assent from 19            |
| 8  |                          |                      | potential trial participants or authorised surrogates, and    |
| 9  |                          |                      | how (see Item 32)                                             |
| 10 |                          |                      |                                                               |
| 11 |                          |                      |                                                               |
| 12 | Consent or assent:       | <a href="#">#26b</a> | Additional consent provisions for collection and use of 19    |
| 13 | ancillary studies        |                      | participant data and biological specimens in ancillary        |
| 14 |                          |                      | studies, if applicable                                        |
| 15 |                          |                      |                                                               |
| 16 |                          |                      |                                                               |
| 17 | Confidentiality          | <a href="#">#27</a>  | How personal information about potential and enrolled 19      |
| 18 |                          |                      | participants will be collected, shared, and maintained in     |
| 19 |                          |                      | order to protect confidentiality before, during, and after    |
| 20 |                          |                      | the trial                                                     |
| 21 |                          |                      |                                                               |
| 22 |                          |                      |                                                               |
| 23 |                          |                      |                                                               |
| 24 | Declaration of           | <a href="#">#28</a>  | Financial and other competing interests for principal 20      |
| 25 | interests                |                      | investigators for the overall trial and each study site       |
| 26 |                          |                      |                                                               |
| 27 |                          |                      |                                                               |
| 28 | Data access              | <a href="#">#29</a>  | Statement of who will have Access to the final trial 18       |
| 29 |                          |                      | dataset, and disclosure of contractual agreements that        |
| 30 |                          |                      | limit such Access for investigators                           |
| 31 |                          |                      |                                                               |
| 32 |                          |                      |                                                               |
| 33 | Ancillary and post trial | <a href="#">#30</a>  | Provisions, if any, for ancillary and post-trial care, and 19 |
| 34 | care                     |                      | for compensation to those who suffer harm from trial          |
| 35 |                          |                      | participation                                                 |
| 36 |                          |                      |                                                               |
| 37 |                          |                      |                                                               |
| 38 |                          |                      |                                                               |
| 39 | Dissemination policy:    | <a href="#">#31a</a> | Plans for investigators and sponsor to communicate trial 19   |
| 40 | trial results            |                      | results to participants, healthcare professionals, the        |
| 41 |                          |                      | public, and other relevant groups (eg, via publication,       |
| 42 |                          |                      | reporting in results databases, or other data sharing         |
| 43 |                          |                      | arrangements), including any publication restrictions         |
| 44 |                          |                      |                                                               |
| 45 |                          |                      |                                                               |
| 46 |                          |                      |                                                               |
| 47 | Dissemination policy:    | <a href="#">#31b</a> | Authorship eligibility guidelines and any intended use of 20  |
| 48 | authorship               |                      | professional writers                                          |
| 49 |                          |                      |                                                               |
| 50 |                          |                      |                                                               |
| 51 | Dissemination policy:    | <a href="#">#31c</a> | Plans, if any, for granting public Access to the full 20      |
| 52 | reproducible research    |                      | protocol, participant-level dataset, and statistical code     |
| 53 |                          |                      |                                                               |
| 54 |                          |                      |                                                               |
| 55 | <b>Appendices</b>        |                      |                                                               |
| 56 |                          |                      |                                                               |
| 57 | Informed consent         | <a href="#">#32</a>  | Model consent form and other related documentation Appendix   |
| 58 | materials                |                      | given to participants and authorised surrogates 2             |
| 59 |                          |                      |                                                               |
| 60 |                          |                      |                                                               |



1 Biological specimens [#33](#) Plans for collection, laboratory evaluation, and storage 15-17  
2 of biological specimens for genetic or molecular analysis  
3 in the current trial and for future use in ancillary studies,  
4 if applicable  
5  
6  
7  
8  
9

10 None The SPIRIT Explanation and Elaboration paper is distributed under the terms of the Creative  
11 Commons Attribution License CC-BY-NC. This checklist can be completed online using  
12 <https://www.goodreports.org/>, a tool made by the [EQUATOR Network](#) in collaboration with  
13 [Penelope.ai](#)  
14  
15  
16  
17  
18  
19  
20  
21  
22  
23  
24  
25  
26  
27  
28  
29  
30  
31  
32  
33  
34  
35  
36  
37  
38  
39  
40  
41  
42  
43  
44  
45  
46  
47  
48  
49  
50  
51  
52  
53  
54  
55  
56  
57  
58  
59  
60

## APPENDIX 2

### Charter and responsibilities of the Data Monitoring and Safety Committee

A Data Monitoring and Safety Committee (DMSC) has been established, and its lead by Clinical Study Center at Thomayer University Hospital, Prague. The DMSC is an independent organ from the study investigators. During the period of recruitment to the study, interim analyses will be supplied, in strict confidence, to the DMSC. In the light of these interim analyses, the DMSC will advise the study steering committee (SSC) if, in its view, the active intervention has been proven, beyond reasonable doubt, to be different from the placebo in some or all patients

Based on the reports of DMSC, the Study steering committee (SSC) can then decide whether or not to modify recruitment to the study and its oncoming course. Unless this happens, however, the SSC, will remain ignorant of the interim results.

The frequency of interim analyses will depend on the judgement of the Chair of the DMSC, in consultation with the SSC. However, we anticipate that there might be two to three interim analyses and one final analysis.

The Chair of DSMC is Mr. Jiri Skopek, M.D., Ph.D. who is available on request at [jiri.skopek1@ftn.cz](mailto:jiri.skopek1@ftn.cz)

#### Premature termination of the study

An interim analysis is performed when 50% of patients have already got to Visit 5 (where primary outcome is evaluated.) The interim analysis is performed by a member of the study's statistical unit who is blinded for the allocation of the active study mixture. The statistician will report to the DMSC. The DMSC will have unblinded Access to all data and discuss the interim-analysis results with the SSC. The SSC decides on continuation or termination of the study and will report to the central Ethics committee. The study will be ended if the frequency of severe adverse events crosses the 5% line. Severe adverse event is defined as that one requiring hospitalisation.

### Appendix 3: Informed consent for FMT donors

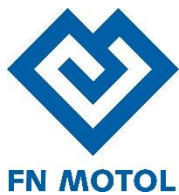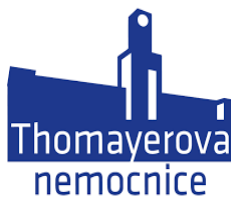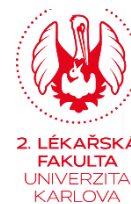

**Informovaný souhlas dospělé osoby s účastí na výzkumu změn střevního mikrobiomu u dospělých pacientů se syndromem dráždivého tračníku ve vědeckém projektu týmů Thomayerovy nemocnice a Fakultní nemocnice v Motole.**

Vážená paní/vážený pane,

syndrom dráždivého tračníku (irritable bowel syndrome, dále jen IBS) je nejčastější funkční onemocnění trávicího traktu, které pacienta výrazně omezuje v jeho každodenním životě. Může se projevat různě, nejčastěji však jako delší dobu trvající bolest břicha s náhle vzniklým nutkáním na stolici. Léčba této nemoci je zdlouhavá, obtížná a ne vždy úspěšná. Dle recentních studií se však jako účinná léčebná metoda jeví transplantace střevní mikroflóry (faecal microbiota transplantation, dále jen FMT). A právě na její využití se zaměřuje náš projekt v podobě klinické intervenční studie.

Cílem projektu je zjistit, zda je transplantace stolice účinnou léčebnou metodu IBS a jak se po FMT mění složení střevní mikroflóry. K tomu abychom FMT mohli provést je potřeba mít vhodné dárce stolice. A právě zde byste nám mohli pomoci. Znalosti změn složení střevní mikroflóry po FMT bychom pak v budoucnu mohli využít buď k cílené ATB terapii negativně asociovaných bakterií nebo naopak k podávání probiotika prospěšných kmenů.

**Proto si Vás dovoluujeme pozvat k účasti na projektu vědeckých týmů Thomayerovy nemocnice a Fakultní nemocnice v Motole. Přečtěte si, prosím, toto poučení.** Pokud plně nerozumíte tomuto textu nebo pokud potřebujete doplňující informace, neváhejte se zeptat lékaře na emailu uvedeném níže. **Pokud souhlasíte s Vaší účastí ve studii, vyplňte prosím kontaktní údaje níže dokumentu a podepište prosím prohlášení, které se nachází v závěru tohoto informovaného souhlasu. Vaše účast je dobrovolná.** Tento souhlas můžete kdykoli zrušit, a to i bez udání důvodu.

Získání vzorku stolice by probíhalo ve vašem domácím prostředí. Stolice by bylo potřeba uchovat v běžném domácím mrazáku (teplota  $-20^{\circ}\text{C}$ ), k odběru byste byli vybaveni jednoduchými odběrovými sety s návodem a poučení o jejich používání. Po domluvě se členy vědeckého týmu (kontakt níže) by vzorky byly převezeny na naše pracoviště a hluboce zamrazeny ( $-80^{\circ}\text{C}$ ).

**Celý proces je dvoufázový.** Z prvního vzorku se provede molekulárně-genetická analýza a následně bioinformatické zpracování dat. Na základě výsledků bude vybráno asi 10-20 dárců, které kontaktujeme na základě informací uvedených níže. Splní-li kritéria vhodného dárce (pro vyžádání lze napsat na mail [jiri.vejmelka@ftn.cz](mailto:jiri.vejmelka@ftn.cz) nebo zavolat na tel.č. 731446619), budou poté znovu požádáni o darování stolice.

Po zpracování pro účely aktuální studie budou vzorky uchovány v hlubokomrazícím boxu v laboratořích Fakultní nemocnice v Motole. Jejich další využití proběhne pouze po přesné specifikaci formou dalšího souhlasu a Vaším podepsáním nového souhlasu.

V tomto projektu řádně dbáme o bezpečnost osobních údajů podle platných zákonů. Zejména je pak zcela zachovaná úplná anonymita pacienta při odesílání vzorků mimo naše pracoviště nebo při

### Appendix 3: Informed consent for FMT donors

zveřejňování vědeckých výsledků získaných z naší práce v odborných časopisech. Odebrané vzorky a z nich získané části jsou v našich laboratořích skladovány na dobu neurčitou, odděleně od osobních dat. Pokud byste v budoucnu svůj souhlas odvolali, Vaše jméno a ostatní osobní data budou bez prodlení vymazána z našich databází i papírových záznamů tak, aby se už nikdo nemohl dozvědět, komu vzorek patřil.

Bližší informace o nemoci jako takové můžete získat od členů vědeckého týmu:

**MUDr. Jiří Vejmelka** (Thomayerova nemocnice), tel: 731446619, email: [jiri.vejmelka@ftn.cz](mailto:jiri.vejmelka@ftn.cz)

**MUDr. Jakub Hurych** (Fakultní nemocnice v Motole), tel. 224432089, email: [jakub.hurych@lfmotol.cuni.cz](mailto:jakub.hurych@lfmotol.cuni.cz)

#### **Souhlas se zpracováním osobních údajů (dále jen „Souhlas“)**

udělený ve smyslu zákona č. 101/2000 Sb., o ochraně osobních údajů a o změně některých zákonů, ve znění pozdějších předpisů a s Nařízením Evropského parlamentu a Rady (EU) 2016/679

#### **Já, níže podepsaný**

*Jméno a příjmení:* .....

*Datum narození:* .....

*Rodné číslo:* .....

*Kontaktní email:* .....

*Telefonní číslo:* .....

#### **Souhlasím se zpracováním svých osobních údajů/ osobních údajů osoby jejíž jsem zákonným zástupcem Fakultní nemocnicí v Motole a Thomayerově nemocnici v rozsahu těchto údajů:**

*Jméno, příjmení, titul, datum a místo narození, rodné číslo, národnost, pohlaví, místo trvalého pobytu, telefon, email, výška, hmotnost*

Tento projev vůle je platný pouze v případě, že mé osobní údaje budou zpracovávány pouze v rozsahu nezbytném pro dosažení účelu zpracování uvedeného v tomto souhlasném prohlášení a v souladu s příslušnou legislativou v platném znění.

#### **Souhlas je poskytnut za účelem:**

*Zpracování vzorku stolice pro vědecko-výzkumnou činnost mající za cíl přispět k porozumění změn střevního mikrobiomu u dospělých pacientů se syndromem dráždivého tračníku*

#### **Souhlasím se zpracováním svých osobních údajů Fakultní nemocnicí v Motole a Thomayerově nemocnici po dobu:**

*Do odebrání mého souhlasu*

#### **Souhlasím se zpřístupněním svých osobních údajů Fakultní nemocnici v Motole a Thomayerově nemocnici:**

Fakultní nemocnice v Motole a Thomayerova nemocnice je oprávněna použít mé osobní údaje pouze v souladu s výše uvedeným účelem a po výše uvedenou dobu, nebo pro legitimní potřebu státních kontrolních

### Appendix 3: Informed consent for FMT donors

orgánů a orgánů činných v trestním řízení.

**Fakultní nemocnice v Motole a Thomayerova nemocnice** je dále oprávněna poskytnout mé osobní údaje pouze subjektům spolupracujícím s **Fakultní nemocnicí v Motole a Thomayerovou nemocnicí** na dosažení primárního účelu, pro který je udělen tento souhlas. S takovými subjekty se **Fakultní nemocnice v Motole a Thomayerova nemocnice** zavazuje uzavřít smlouvu obsahující stejné podmínky pro zpracování mých osobních údajů. Zpracování bude probíhat v souladu s příslušnými právními normami o ochraně osobních údajů a s Nařízením Evropského parlamentu a Rady (EU) 2016/679 ze dne 27. dubna 2016 o ochraně fyzických osob v souvislosti se zpracováním osobních údajů a o volném pohybu těchto údajů a o zrušení směrnice 95/46/ES (obecné nařízení o ochraně osobních údajů).

#### Byl/a jsem poučen/a o tom, že poskytnutí údajů je dobrovolné.

Dále jsem byl/a v souladu s příslušnou legislativou poučen/a:

- O svém právu tento souhlas odvolat, a to i bez udání důvodu,
- O svém právu přístupu k těmto údajům a právu na jejich opravu,
- O svém právu na vymazání těchto údajů, pokud dochází k jejich zpracování v rozporu s ochranou definovanou příslušnou legislativou nebo v rozporu s tímto souhlasem, nebo byl souhlas odvolán, svém právu podat stížnost u Úřadu pro ochranu osobních údajů.

Byl/a jsem také poučen/a o tom, že tato svá práva mohu uplatnit doručením žádosti na adresu: Fakultní nemocnice v Motole, Samostatné oddělení pověřence pro ochranu osobních údajů, V Úvalu 84, Praha 5.

Beru na vědomí, že odvolání tohoto souhlasu může ovlivnit dosažení účelu, pro který byl tento souhlas vydán, pokud tohoto účelu nelze dosáhnout jinak.

Prohlašuji, že jsem textu poučení porozuměl(a) a byl jsem lékařem srozumitelně informován(a) o povaze daného vyšetření a že jsem měl(a) možnost klást lékaři doplňující dotazy.

Na základě tohoto poučení dále prohlašuji, že souhlasím se zařazením svých vzorků do studie probíhající v **Thomayerově nemocnici a Fakultní nemocnici v Motole**, jejímž cílem je porozumět změnám složení střevního mikrobiomu u dospělých pacientů se syndromem dráždivého tračníku.

V ..... dne .....

**Jméno a příjmení vyšetřované osoby** : .....

Podpis vyšetřované osoby .....

Prohlašuji, že jsem vysvětlil podstatu, účel a povahu odběrů pacientovi způsobem, který byl podle mého soudu srozumitelný.

**Jméno a příjmení lékaře**: .....

Podpis: .....

Datum: .....

**APPENDIX 4 – INFORMED CONSENT FORM FOR FMT RECIPIENTS (CZECH)****Informovaný souhlas pacienta - studie fekální mikrobiální terapie  
u pacientů se syndromem dráždivého tračníku**

Název studie: Fekální mikrobiální terapie u pacientů se syndromem dráždivého tračníku

Jméno pacienta:

Datum narození:

Pacient byl do studie zařazen pod číslem:

Odpovědný lékař:

1. Já, níže podepsaný (á) souhlasím s mou účastí ve studii. Je mi více než 18 let.
2. Byl (a) jsem podrobně informován (a) o cíli studie, o jejích postupech, a o tom, co se ode mě očekává. Lékař pověřený prováděním studie mi vysvětlil očekávané přínosy a případná zdravotní rizika, která by se mohla vyskytnout během mé účasti ve studii, a vysvětlil mi, jak bude postupovat při výskytu jejího nežádoucího průběhu. Beru na vědomí, že prováděná studie je výzkumnou činností. Beru na vědomí pravděpodobnost náhodného zařazení do jednotlivých skupin lišících se léčbou.
3. Informoval (a) jsem lékaře pověřeného studií o všech lécích, které jsem užíval (a) v posledních 3 měsících, i o těch, které v současnosti užívám. Bude-li mi nějaký lék předepsán jiným lékařem, budu ho informovat o své účasti v klinické studii a bez souhlasu lékaře pověřeného touto studií ho nevezmu.
4. Budu při své léčbě se svým lékařem spolupracovat a v případě výskytu jakéhokoliv neobvyklého nebo nečekaného příznaku ho budu ihned informovat.
5. Po celou dobu studie a další 4 týdny po jejím ukončení nebudu dárce krve.
6. Porozuměl (a) jsem tomu, že svou účast ve studii mohu kdykoliv přerušit či odstoupit, aniž by to jakkoliv ovlivnilo průběh mého dalšího léčení. Moje účast ve studii je dobrovolná.
7. Při zařazení do studie budou moje osobní data uchována s plnou ochranou důvěrnosti dle platných zákonů ČR. Do mé původní zdravotní dokumentace budou moci na základě mého uděleného souhlasu nahlédnout za účelem ověření získaných údajů zástupci nezávislých etických komisí a zahraničních nebo místních kompetentních úřadů. Pro tyto případy je zaručena ochrana důvěrnosti mých osobních dat. Při vlastním provádění studie mohou být osobní údaje poskytnuty jiným než výše uvedeným subjektům pouze bez identifikačních údajů, a to jako anonymní data pod číselným kódem. Rovněž pro výzkumné a vědecké účely mohou být moje osobní údaje poskytnuty pouze bez identifikačních údajů (anonymní data) nebo s mým výslovným souhlasem. Při předávání dat po 25. 5. 2018 bude zajištěna ochrana osobních údajů požadovaná „Nařízením Evropského parlamentu a Rady (EU) 2016/679 ze dne 27. dubna 2016 o ochraně fyzických osob v souvislosti se zpracováním osobních údajů“ známé pod označením GDPR.
8. S mou účastí ve studii není spojeno poskytnutí žádné odměny.
9. Porozuměl jsem tomu, že mé jméno se nebude nikdy vyskytovat v referátech o této studii. Já pak naopak nebudu proti použití výsledků z této studie.
10. Převzal/a jsem podepsaný stejnopis tohoto informovaného souhlasu.

Podpis pacienta:

Podpis lékaře pověřeného touto studií:

1  
2  
3  
4  
5  
6  
7  
8  
9  
10  
11  
12  
13  
14  
15  
16  
17  
18  
19  
20  
21  
22  
23  
24  
25  
26  
27  
28  
29  
30  
31  
32  
33  
34  
35  
36  
37  
38  
39  
40  
41  
42  
43  
44  
45  
46  
47  
48  
49  
50  
51  
52  
53  
54  
55  
56  
57  
58  
59  
60

Datum:

Datum:

For peer review only

# BMJ Open

## Protocol for faecal microbiota transplantation in irritable bowel syndrome – the MISCEAT study: a randomised, double-blind cross-over study utilising mixed microbiota from healthy donors

|                                 |                                                                                                                                                                                                                                                                                                                                                                                                                                                                                                                                                                                                                                                                                                                                                                                                                                                                                                                                     |
|---------------------------------|-------------------------------------------------------------------------------------------------------------------------------------------------------------------------------------------------------------------------------------------------------------------------------------------------------------------------------------------------------------------------------------------------------------------------------------------------------------------------------------------------------------------------------------------------------------------------------------------------------------------------------------------------------------------------------------------------------------------------------------------------------------------------------------------------------------------------------------------------------------------------------------------------------------------------------------|
| Journal:                        | <i>BMJ Open</i>                                                                                                                                                                                                                                                                                                                                                                                                                                                                                                                                                                                                                                                                                                                                                                                                                                                                                                                     |
| Manuscript ID                   | bmjopen-2021-056594.R1                                                                                                                                                                                                                                                                                                                                                                                                                                                                                                                                                                                                                                                                                                                                                                                                                                                                                                              |
| Article Type:                   | Protocol                                                                                                                                                                                                                                                                                                                                                                                                                                                                                                                                                                                                                                                                                                                                                                                                                                                                                                                            |
| Date Submitted by the Author:   | 09-May-2022                                                                                                                                                                                                                                                                                                                                                                                                                                                                                                                                                                                                                                                                                                                                                                                                                                                                                                                         |
| Complete List of Authors:       | Hurych, Jakub; Charles University Second Faculty of Medicine, Department of Medical Microbiology; Charles University Second Faculty of Medicine, Department of Paediatrics<br>Vejmelka, Jiri; Charles University Third Faculty of Medicine, Department of Internal Medicine<br>Vodolanova, Lucie; Charles University Second Faculty of Medicine, Department of Paediatrics<br>Kramna, Lenka; Charles University Second Faculty of Medicine, Department of Paediatrics<br>Larionov, Vladyslav; Charles University Second Faculty of Medicine, Department of Paediatrics<br>Kulich, Michal; Charles University, Department of Probability and Statistics<br>Cinek, Ondrej; Charles University Second Faculty of Medicine, Department of Pediatrics; Charles University Second Faculty of Medicine, Department of Medical Microbiology<br>Kohout, Pavel; Charles University Third Faculty of Medicine, Department of Internal Medicine |
| <b>Primary Subject Heading</b>: | Gastroenterology and hepatology                                                                                                                                                                                                                                                                                                                                                                                                                                                                                                                                                                                                                                                                                                                                                                                                                                                                                                     |
| Secondary Subject Heading:      | Evidence based practice, Genetics and genomics, Research methods                                                                                                                                                                                                                                                                                                                                                                                                                                                                                                                                                                                                                                                                                                                                                                                                                                                                    |
| Keywords:                       | Functional bowel disorders < GASTROENTEROLOGY, Adult gastroenterology < GASTROENTEROLOGY, MICROBIOLOGY                                                                                                                                                                                                                                                                                                                                                                                                                                                                                                                                                                                                                                                                                                                                                                                                                              |
|                                 |                                                                                                                                                                                                                                                                                                                                                                                                                                                                                                                                                                                                                                                                                                                                                                                                                                                                                                                                     |

SCHOLARONE™  
Manuscripts



1  
2  
3 1  
4  
5  
6 2 **Protocol for faecal microbiota transplantation in irritable bowel syndrome – the MISCEAT**  
7  
8 3 **study: a randomised, double-blind cross-over study utilising mixed microbiota from**  
9  
10 4 **healthy donors**  
11  
12  
13 5  
14

15 6 Jakub Hurych<sup>1,2\*</sup>, Jiri Vejmelka<sup>3\*</sup>, Lucie Vodolanova<sup>2</sup>, Lenka Kramna<sup>2</sup>, Vladyslav Larionov<sup>2</sup>, Michal  
16  
17 7 Kulich<sup>4</sup>, Ondrej Cinek<sup>1,2†</sup>, Pavel Kohout<sup>3†</sup>  
18

19 8 \*Shared first authorship, † shared last authorship  
20  
21  
22 9  
23

24 10 **Affiliations:**

25  
26 11 <sup>1</sup> Department of Medical Microbiology, 2nd Faculty of Medicine Charles University, Prague, Czechia  
27

28 12 <sup>2</sup> Department of Paediatrics, 2nd Faculty of Medicine Charles University, Prague, Czechia  
29

30 13 <sup>3</sup> Department of Internal Medicine, 3rd Faculty of Medicine Charles University and Thomayer  
31  
32 University Hospital, Prague, Czechia  
33

34 14  
35 15 <sup>4</sup> Department of Probability and Statistics, Faculty of Mathematics and Physics, Charles University,  
36  
37 16 Prague, Czechia  
38  
39  
40 17

41  
42 18 **Correspondance:** Jakub Hurych, M.D., Department of Paediatrics and Department of Medical  
43  
44 19 Microbiology, 2nd Faculty of Medicine Charles University, Prague, Czechia; V Uvalu 84/5, 15006,  
45  
46 20 Prague 5; [jakub.hurych@lfmotol.cuni.cz](mailto:jakub.hurych@lfmotol.cuni.cz)  
47  
48  
49 21

50  
51 22 **Word counts:** 3798  
52  
53

54 23 **Abbreviations:** IBS, Irritable Bowel Syndrome; IBS-D, diarrheal type of irritable bowel syndrome; IBS-  
55  
56 24 M, mixed type of irritable bowel syndrome; IBS-C, constipated type of irritable bowel syndrome; IBS-  
57  
58 25 SSS, Irritable Bowel Syndrome Severity Scale Score  
59  
60

1  
2  
3 26 **Keywords:** irritable bowel syndrome, faecal microbiota transplantation, irritable bowel syndrome  
4  
5 27 severity scale score, gut microbiome  
6  
7  
8  
9  
10  
11  
12  
13  
14  
15  
16  
17  
18  
19  
20  
21  
22  
23  
24  
25  
26  
27  
28  
29  
30  
31  
32  
33  
34  
35  
36  
37  
38  
39  
40  
41  
42  
43  
44  
45  
46  
47  
48  
49  
50  
51  
52  
53  
54  
55  
56  
57  
58  
59  
60

For peer review only

1  
2  
3 **29 AUTHORS AND INSTITUTIONS**  
4

5 30 Jakub Hurych, M.D., Department of Paediatrics and Department of Medical Microbiology, 2nd  
6  
7  
8 31 Faculty of Medicine, Charles University, University Hospital Motol, Prague, Czechia;  
9  
10 32 [jakub.hurych@lfmotol.cuni.cz](mailto:jakub.hurych@lfmotol.cuni.cz)  
11

12 33  
13  
14 34 Jiří Vejmelka, M.D., Department of Internal Medicine, 3rd Faculty of Medicine Charles University and  
15  
16 35 Thomayer University Hospital, Prague, Czechia, [jiri.vejmelka@ftn.cz](mailto:jiri.vejmelka@ftn.cz)  
17

18 36  
19  
20  
21 37 Lucie Vodolánová, M.Sc., Department of Paediatrics and Department Medical Microbiology, 2nd  
22  
23 38 Faculty of Medicine ,Charles University, University Hospital Motol, Prague, Czechia;  
24  
25 39 [lucie.vodolanova@lfmotol.cuni.cz](mailto:lucie.vodolanova@lfmotol.cuni.cz)  
26

27 40  
28  
29  
30 41 Lenka Kramná, M.Sc., Ph.D., Department of Paediatrics and Department Medical Microbiology, 2nd  
31  
32 42 Faculty of Medicine ,Charles University, University Hospital Motol, Prague, Czechia;  
33  
34 43 [lenka.kramna@lfmotol.cuni.cz](mailto:lenka.kramna@lfmotol.cuni.cz)  
35

36 44  
37  
38  
39 45 Vladyslav Larionov, B.Sc., Department of Paediatrics and Department Medical Microbiology, 2nd  
40  
41 46 Faculty of Medicine ,Charles University, University Hospital Motol, Prague, Czechia;  
42  
43 47 [vladyslav.larionov@fnmotol.cz](mailto:vladyslav.larionov@fnmotol.cz)  
44

45 48  
46  
47  
48 49 Assoc. prof. Michal Kulich, M.Sc., Ph.D., Department of Probability and Statistics, Faculty of  
49  
50 50 Mathematics and Physics, Charles University, Prague, Czechia; [kulich@karlin.mff.cuni.cz](mailto:kulich@karlin.mff.cuni.cz)  
51

52 51  
53  
54 52 Prof. Ondřej Cinek, M.D., Ph.D., Department of Paediatrics and Department of Medical Microbiology,  
55  
56 53 2nd Faculty of Medicine ,Charles University, University Hospital Motol, Prague, Czechia;  
57  
58 54 [ondrej.cinek@lfmotol.cuni.cz](mailto:ondrej.cinek@lfmotol.cuni.cz)  
59  
60

1  
2  
3 55  
4  
5  
6 56 Assoc. prof. Pavel Kohout, M.D., Ph.D. Department of Internal Medicine, 3rd Faculty of Medicine  
7  
8 57 Charles University and Thomayer University Hospital, Prague, Czechia; pavel.kohout@ftn.cz  
9  
10  
11  
12  
13  
14  
15  
16  
17  
18  
19  
20  
21  
22  
23  
24  
25  
26  
27  
28  
29  
30  
31  
32  
33  
34  
35  
36  
37  
38  
39  
40  
41  
42  
43  
44  
45  
46  
47  
48  
49  
50  
51  
52  
53  
54  
55  
56  
57  
58  
59  
60

For peer review only

**ABSTRACT**

**Introduction.** Several studies have demonstrated dysbiosis in irritable bowel syndrome (IBS).

Therefore, faecal microbiota transplantation, whose effect and safety have been proven in *Clostridioides difficile* infections, may hold promise in other conditions, including irritable bowel syndrome. Our study will examine the effectiveness of stool transfer with artificially increased microbial diversity in IBS treatment.

**Methods and analysis** A three-group, double-blind, randomized, cross-over, placebo-controlled study of two pairs of gut microbiota transfer will be conducted in 99 patients with diarrhoeal or mixed type of IBS. Patients aged 18-65 will be randomised into three equally sized groups: group A will first receive two enemas of study microbiota mixture (deep-frozen stored stool microbiota mixed from eight healthy donors); after eight weeks, they will receive two enemas with placebo (autoclaved microbiota mixture), whereas group B will first receive placebo, then microbiota mixture. Finally, group C will receive placebos only. The irritable bowel syndrome severity symptom score (IBS-SSS) questionnaires will be collected at baseline and then at weeks 3,5,8,11,13,32. Faecal bacteriome will be profiled before and regularly after interventions using 16S rDNA next-generation sequencing. Food records, dietary questionnaires, anthropometry, bioimpedance, biochemistry and haematology workup will be obtained at study visits during the follow-up period. The primary outcome is the change in the IBS-SSS between the baseline and four weeks after the intervention for each patient compared to placebo. Secondary outcomes are IBS-SSS at two weeks after the intervention and 32 weeks compared to placebo and changes in urgent defecations frequency, Bristol stool scale, abdominal pain and bloating, anthropometric parameters, psychological evaluation and the gut microbiome composition.

**Ethics and dissemination.** The study was approved by the Ethics Committee of Thomayer University Hospital, Czechia (G-18-26). The study results will be published in peer-reviewed journals and presented at international conferences and patient group meetings.

1  
2  
3 83 **Study registration number.** NTC04899869  
4  
5

6 84  
7  
8

9 85 **STRENGTHS AND LIMITATIONS OF THIS STUDY**  
10

11 86 ➤ Usage of mixed microbiota from multiple donors inflates the diversity of transferred microbiota  
12  
13  
14 87 by enriching it for numerous rare species.  
15

16 88 ➤ All interventions will be carried out using the same active mixed microbiota or the same placebo.  
17

18 89 ➤ Each intervention consists of two consecutive transfers, which increases the probability that the  
19  
20  
21 90 transferred microbiota engrafts.  
22

23 91 ➤ Microbiome profiling, food records, anthropometry and bioimpedance data allow detailed  
24  
25 92 monitoring of transfer effectiveness.  
26

27 93 ➤ Mucosa-associated microbiota will not be assessed because the stool transfer will be performed  
28  
29  
30 94 by enema, not colonoscopy that would allow biopsies.  
31  
32  
33  
34  
35  
36  
37  
38  
39  
40  
41  
42  
43  
44  
45  
46  
47  
48  
49  
50  
51  
52  
53  
54  
55  
56  
57  
58  
59  
60

## 95 INTRODUCTION

96 Irritable bowel syndrome (IBS) is characterised as recurrent abdominal pain on average at least one  
97 day/week in the last three months, associated with two or more of the following criteria: 1) related  
98 to defecation; 2) associated with a change in the frequency of stool; 3) associated with a change in  
99 the form (appearance) of stool [1]. It is common among the adult European population (approx. 10%  
100 [2]), but its aetiology is still unknown. It may, among other causes, include micro-inflammation,  
101 disturbance of the brain-gut axis, inadequate secretion of bile acids, increased permeability of the  
102 gut epithelial barrier, or gut dysbiosis. Dysbiosis in IBS has been suggested by several studies  
103 (reviewed, e.g. in Rajilic-Stojanovic et al. [3]). There are indications that Firmicutes may be disturbed,  
104 with *Dorea*, *Blautia* and *Roseburia* increased, whereas *Veillonella* and *Faecalibacterium* decreased.  
105 Among Actinobacteria, a decrease in *Bifidobacterium* was noted, and among Proteobacteria,  
106 *Enterobacteriaceae* were increased. Conflicting and heterogeneous results were reported for  
107 Bacteroidetes. The major limitation of available studies is their cross-sectional character, which may  
108 not be enough in a disease where diarrhoeal episodes alternate with normal stool composition or  
109 constipation.

110  
111 The faecal microbiota transplantation (FMT) has gained popularity by its remarkable effect in  
112 recurrent *Clostridioides difficile* infections, where it has now become a recognised life-saving therapy  
113 [4]. The first published randomized, double-blinded study on FMT in IBS, published in 2018 when  
114 starting our study [5], used stool intervention from an allogeneic donor or autologous stool. The  
115 intervention was centred on a well-defined group of IBS of predominantly diarrhoeal form. The stool  
116 was transferred by colonoscopy to the cecum. The primary outcome was an improvement in the  
117 *Irritable Bowel Syndrome - Severity Symptom Score* (IBS-SSS). The treatment was associated with a  
118 significant effect at three months but not at 12 months post-intervention [5]. This study used single  
119 donors and did not assess stool microbiota. Thus, the transferred microbiota likely varied between  
120 transfers both in their composition and in their diversity. Since then, more studies focused on FMT in

1  
2  
3 121 IBS have been carried out [6, 7, 8, 9, 10, 11]. They differed in design, but none of them used a mixed  
4  
5 122 microbiota from multiple donors as the active substance. Furthermore, a recent meta-analysis of  
6  
7 123 randomized control trials on FMT in IBS (including the above-mentioned articles) pointed out  
8  
9 124 insufficient evidence quality to support recommending FMT in the treatment of IBS. [12]  
10  
11

12 125

13  
14 126 Our study protocol aims to test whether faecal microbiota transplantation of mixed microbiota from  
15  
16 127 several selected donors can alleviate symptoms of IBS measured by IBS-SSS four weeks after the  
17  
18 128 intervention, as compared to autoclaved placebo. The secondary study aims to test the acute (after  
19  
20 129 two weeks) and the long-term effect (after six months) on symptoms relief. We also focus on  
21  
22 130 changes in frequency of urgent defecations, Bristol stool scale, abdominal pain and bloating, body  
23  
24 131 weight, fat content and anthropometric measurements (including waist, hip and limbs  
25  
26 132 circumferences and skinfold thickness) and the gut microbiome composition.  
27  
28

29  
30 133

31  
32 134 We hypothesise that the transfer of active microbiota of high diversity can lead to changes in the  
33  
34 135 patient's gut microbiome composition and/or function to alleviate IBS symptoms.  
35  
36  
37  
38  
39  
40  
41  
42  
43  
44  
45  
46  
47  
48  
49  
50  
51  
52  
53  
54  
55  
56  
57  
58  
59  
60



## 136 **METHODS AND ANALYSIS**

### 137 **Study design**

138 This is a three-group, double-blind, placebo-controlled, randomized, cross-over study in adult  
139 patients diagnosed with IBS (diarrhoeal or mixed form) according to Rome IV criteria. Each study  
140 subject will undergo two pairs of FMT (a total of four enemas for each patient), with the pairs of  
141 transfers being eight weeks apart. The active intervention substance is a mixed stool microbiota  
142 derived from healthy individuals who were preselected for high alpha diversity of their microbiome  
143 and distance in community ordination from IBS patient's microbiota. Placebo is the same mixture,  
144 inactivated by autoclaving.

145  
146 The study subjects are randomly assigned to one of three groups: A) enema with active substance  
147 first and with placebo second or B) enema with placebo first and active substance second or C)  
148 enemas of placebo only (detailed scheme in **Figure 1**). Eligible participants will be followed-up for 32  
149 weeks after the first intervention to monitor symptom severity scoring of IBS (IBS-SSS), with regular  
150 profiling of their gut microbiome and other parameters (frequency of urgent defecations, Bristol  
151 stool scale, abdominal pain and bloating, body weight, fat content, and other anthropometric  
152 parameters).

153  
154 The placebo group is planned because of the unknown onset and duration of the intervention effect:  
155 if the beginning of an effect is delayed, or if it persists for a long time, simple cross-over design would  
156 not have sufficient power due to the carry-over effect. In case the FMT was associated with  
157 significant but not durable amelioration of the status, the control group would still increase the  
158 statistical power.

159  
160 This study protocol is reported as per the SPIRIT guidelines [13] (for the SPIRIT checklist see **Appendix**  
161 **1**).

1  
2  
3 1624  
5 163 **Study setting**

6  
7  
8 164 The participants are recruited at a single center, the Department of Internal Medicine, Thomayer  
9  
10 165 University Hospital in Prague, Czech Republic. This hospital has approximately 1,000 beds, including  
11  
12 166 80 in ICU's, serves approximately 50,000 patients per year. The center is experienced in treating  
13  
14 167 patients with IBS and other functional gastrointestinal disorders, with about 200 such patients  
15  
16 168 registered and further subjects coming for consultations from other workplaces to this tertiary  
17  
18 169 referral centre.  
19

20  
21 17022  
23 171 **Recruitment and eligibility criteria**24  
25 172 Stool donors

26  
27  
28 173 Stool donor candidates were recruited among blood donors at Thomayer University Hospital and  
29  
30 174 medical students in their first year of study (i.e. preclinical) from the 2nd Faculty of Medicine, Charles  
31  
32 175 University, Prague. We obtained stool samples from 58 such candidates fulfilling the inclusion criteria  
33  
34 176 (**Table 1**). Based on their high bacterial alpha-diversity and by the position on the ordination plot of  
35  
36 177 the weighted Unifrac distance against 46 patients with IBS-D (**Figure 2**), 14 candidates proceeded to  
37  
38 178 the safety screening, whereby eight passed it (for reasons of candidate's exclusion, see **Figure 3**).  
39

40  
41 179

42  
43  
44 180 After 14 potential donors were selected based on the microbiota composition, they were screened  
45  
46 181 for infectious diseases and clinically examined as indicated by the *European consensus conference on*  
47  
48 182 *faecal microbiota transplantation in clinical practice guidelines* [14] (**Table 2**). All subjects were also  
49  
50 183 repeatedly tested for SARS-CoV-2 from both nasopharyngeal swab and stool. Six candidates were  
51  
52 184 excluded (for reasons, see **Figure 3**), whereas eight became regular stool donors. These eight donors  
53  
54 185 were regularly investigated as follows:  
55  
56  
57  
58  
59  
60

- 1  
2  
3 186 - at every donation: by questionnaire for gastrointestinal symptoms, antibiotic usage, unprotected  
4  
5 187 sex, travelling to exotic countries; clinical signs of COVID-19; the presence of SARS-CoV-2 in the  
6  
7 188 donated stool;  
8  
9  
10 189 - every 4 weeks: for SARS-CoV-2 from nasopharyngeal swab;  
11  
12 190 - every 8-12 weeks: for all other stool tests mentioned in **Table 2**.

13  
14 19115  
16 192 Prospective study participants

17  
18 193 Patients diagnosed with IBS-D (diarrheal type) or IBS-M (mixed diarrhoeal and constipation type) who  
19  
20 194 fulfil the inclusion and exclusion criteria listed in **Table 3** are recruited via regular patient's check-ups  
21  
22 195 at the Gastroenterological unit at Thomayer University Hospital, by referrals from their general  
23  
24 196 practitioners, following our newspaper articles or word of mouth.  
25  
26  
27

28 197

### 29 30 198 **Study microbiota mixture for intervention**

31  
32 199 The intervention microbiota is a mixture of regular stool donations from the eight regular donors.  
33  
34 200 The collection of stools for this purpose is already completed. The donors were advised to regularly  
35  
36 201 defecate at their home toilet into a clean plastic bag placed in Fecotainer (Excretas Medical, NL) with  
37  
38 202 an Anaerogen bag (Thermo Scientific, USA). This bag generated an anaerobic atmosphere during  
39  
40 203 transport to ensure anaerobes survival. The stool was transported to the laboratory with the  
41  
42 204 maximum allowable time until processing being 6 hours; the actual time was approximately 1.5  
43  
44 205 hours. The stool was weighed upon arrival, inspected for blood admixture, and immediately  
45  
46 206 processed by blending with a solution consisting of sterile 0.9% saline (160 ml per 100 g of stool),  
47  
48 207 sterile phosphate buffer saline at pH 7.4 (20 ml per 100 g of stool) and sterile 99.5% glycerol (20 ml  
49  
50 208 per 100 g stool, which is approximately 10% of solution's volume; therefore, it is unlikely to have  
51  
52 209 laxative properties upon administration). From our experience, ~ 105 ml of the study mixture  
53  
54 210 represents ~40 g of stool. The mixture was then filtered through a sterile stainless steel mesh of 0.8  
55  
56 211 mm pore size into a sterile plastic bottle, which was then immediately frozen at -80°C. Whenever  
57  
58  
59  
60

1  
2  
3 212 possible (blending or post-filtration), the procedure was performed under a nitrogen atmosphere to  
4  
5 213 protect obligate anaerobes. All stool portions were mixed together in a large stainless steel bucket  
6  
7 214 using an electric mortar mixer under anaerobic conditions and at low temperature (on ice).  
8  
9

10 215  
11  
12 216 Based on the recommendation from the Nanjing consensus [15], the bacterial cell content of the  
13  
14 217 study microbiota mixture was quantified. We performed a real-time PCR of the 16S rRNA gene with a  
15  
16 218 standard curve derived from bacterial culture and controls from previously used stool transplants  
17  
18 219 from another centre. It was estimated that the cell count in the transfer ranged between  $2e+12$  and  
19  
20 220  $1e+13$  (depending on the expected composition of the microbiota as to the 16S gene count per an  
21  
22 221 average bacterial cell). Unfortunately, the Nanjing consensus [15] provides neither reference to the  
23  
24 222 cell counting method (Table 2 therein) nor to control materials. Therefore more exact direct  
25  
26 223 comparison of the requested quantities is not possible.  
27  
28  
29

30 224  
31  
32 225 The mixed microbiota substance was divided into aliquots of 13-14 g (which is  $\sim 35$  ml). Two-thirds of  
33  
34 226 the tubes served as a placebo: they were immediately autoclaved at  $121^{\circ}\text{C}$  for 30 minutes with slow  
35  
36 227 cooling. Pre-sterilised tubes were used to ensure that autoclaved placebos would not be visually  
37  
38 228 distinguishable from tubes with the active substance. Assignment of tubes to the autoclave,  
39  
40 229 numbering, sealing, and labelling were done under the guidance of a statistical unit member (see  
41  
42 230 below).  
43  
44  
45

46 231  
47  
48 232 All aliquot tubes are kept frozen at  $-80^{\circ}\text{C}$  in the same type of plastic tubes, labelled by codes. Three  
49  
50 233 such aliquots represent one dose for FMT ( $\sim 40$  g of stool, in  $\sim 105$  ml). Aliquoting into multiple 50 ml  
51  
52 234 tubes instead of one larger volume was decided because of the availability of durable plastic, which  
53  
54 235 must be both autoclavable and deep frost resistant.  
55  
56

57 236  
58  
59  
60

1  
2  
3 237 Before administering, the study microbiota mixture will be thawed in a warm (37°C) water bath, with  
4  
5 238 intermittent mixing by inverting the tubes.

6  
7 239

### 10 240 **Randomization, allocation and blinding**

11  
12 241 At Visit 1, each patient is randomised into one of three equally sized groups (Figure 1) as described in  
13  
14 242 the *Study design*. Randomisation assignments is generated in advance in blocks of nine and stored in  
15  
16 243 a protected database. For each patient, anonymous codes for tubes containing either active study  
17  
18 244 microbiota mixture or placebo is received. Thus, the true assignment will remain concealed for the  
19  
20 245 patients and the study staff until the end of the study observation period. The Investigator is  
21  
22 246 encouraged to maintain the blind as far as possible. The actual allocation must not be disclosed to  
23  
24 247 the patient and/or other study personnel including other site personnel, monitors, corporate  
25  
26 248 sponsors or project office staff; nor should there be any written or verbal disclosure of the code in  
27  
28 249 any of the corresponding patient documents.

29  
30 250

### 34 251 **Study Intervention**

35  
36 252 Study substance is administered during Visit 2+3 and then again 7+8 as a retention colon enema and  
37  
38 253 will be held optimally for at least 30 minutes. Bowel preparation is applied the day before the  
39  
40 254 intervention (prior to Visit 2 and Visit 7) (natrii picosulfas 10 milligrams, magnesi oxidum leve 3,5  
41  
42 255 grams, acidum citricum 12 grams). No preparation is performed before the second enema in the pair  
43  
44 256 (visits 3 and 8).

45  
46 257

47  
48 258 A rectal tube is inserted into the rectum, and the enema is applied. Application kit (Irrigator PN  
49  
50 259 0462/E/93, EriLens, Czechia) is used. After the enema is applied, the patient position is changed to  
51  
52 260 enable the study substance to be spread within the colon. The exact time of the enema completion is  
53  
54 261 recorded as well as the enema retention time.

55  
56 262

## 263 **Outcomes**

### 264 Primary outcome

265 The primary outcome is the change in the IBS severity symptom score (IBS-SSS) in the active  
266 microbiota group relative to the placebo group. The change will be evaluated as the difference  
267 between the score at four weeks after the intervention (study weeks 5 or 13, respectively, see **Figure**  
268 **1**) and the baseline score (week -1 in group A or week 8 in group B).

269

### 270 Secondary outcomes

- 271 - The acute change in the IBS severity symptom score (IBS-SSS) between baseline and two weeks  
272 after intervention (study weeks 3 and 11, respectively, see **Figure 1**).
- 273 - The long-term change in the IBS severity symptom score (IBS-SSS) between baseline (week -1)  
274 and week 32 (see **Figure 1**). The long term change will compare group C (placebo only) to  
275 merged groups A+B (active study microbiota mixture).
- 276 - Changes due to the intervention in (a) frequency of urgent defecations, (b) Bristol stool scale, (c)  
277 abdominal pain and bloating, (d) body weight, fat content, and other anthropometric parameters
- 278 - The durability of changes (if any) in the microbial profiles by bacteriome profiling, parasite  
279 screening, and virome sequencing
- 280 - The psychological and well-being effects of the therapy scored by IBS-QoL questionnaires
- 281 - The long term effects of the therapy on stool frequency and consistency and on the gut  
282 microbiome and statistically significant changes in anthropometric measurements.

283

## 284 **Data collection and follow-up**

### 285 Timing of assessments

286 At visit 1 (the randomization), the patient is given detailed instructions and thoroughly instructed by  
287 the study team. The patients are asked to keep the identical type of diet throughout the observation.  
288 They are asked to regularly (once a week) fill the study questionnaire. A study team member sends

1  
2  
3 289 that via the Survey Monkey smartphone application, an online survey development cloud-based  
4  
5 290 software. Relevant data are entered in a structured manner (frequency of defecation, Bristol stool  
6  
7 291 scale, pain measures, other symptoms, dietary records etc.). This member also frequently  
8  
9  
10 292 communicate with study participants and answer any questions regarding the study to keep the  
11  
12 293 patient's adherence. An overview of the examinations at each visit and the timing of the study visits  
13  
14 294 could be seen in **Table 4**.

15  
16 295  
17  
18 296 Irritable bowel syndrome severity scale score (IBS-SSS).  
19  
20 297 The IBS-SSS is a five-question survey that reflects 1) the severity of abdominal pain, 2) frequency of  
21  
22 298 abdominal pain, 3) severity of abdominal distention, 4) satisfaction with bowel habits, and 5)  
23  
24 299 interference with quality of life over the past ten days. Subjects respond to each question on a 100-  
25  
26 300 point analogue scale ; thus, the score can range from 0 to 500, with higher scores indicating more  
27  
28 301 severe symptoms.[16]

29  
30 302  
31  
32  
33  
34 303 At eligibility screening, the patients is given instructions on how to fill the IBS-SSS questionnaires (via  
35  
36 304 the Survey Monkey application). The questionnaires are filled in at eligibility screening and then at  
37  
38 305 week -1, 3, 5 (before the first intervention, at the presumed peak of its effect, and after further 2  
39  
40 306 weeks), then at weeks 8, 11, 13 (similarly with the second intervention), and finally at week 32.

41  
42 307  
43  
44 308 Weight, height, bioimpedance

45  
46 309 Body weight, height and bioimpedance is examined during Visit 0, 1, 4, 5, 9 and 11. Medical Body  
47  
48 310 Composition Analyzer Seca mBCA 515, (Seca, Germany) is used to measure changes in body  
49  
50 311 composition (8-point bioelectric impedance analysis at a frequency of 5 - 50 kHz with a current of  
51  
52 312 100  $\mu$ A), scanning performed with three pairs of hand electrodes and two pairs of leg electrodes,  
53  
54 313 measurements performed with light clothing and without metal objects (jewellery, keys). The weight  
55  
56 314 is determined in patients wearing underwear using the Seca mBCA 515. The height is determined by  
57  
58  
59  
60

1  
2  
3 315 a standardised technique with a metal stadiometer with an accuracy of 1 mm. Seca analytics 115  
4  
5 316 software is used to analyse the obtained data (Seca, Hamburg, Germany ). The measurements is  
6  
7 317 performed according to the NIHR Southampton Biomedical Research Centre standard protocol (Seca  
8  
9 318 mBCA, NIHR Southampton Biomedical Research Centre, 2014).  
10  
11

12 319

#### 14 320 Detailed anthropometry

16 321 It is performed by nutritional therapists in Visit 1, 5, 10 and 11. It involves weight, abdominal (waist)  
17  
18 322 circumference, buttocks (hip) circumference, thigh circumference, skinfolds (thigh, triceps,  
19  
20 323 subscapular, suprailiacal).  
21  
22

23 324

#### 25 325 Serum workup, archiving serum+plasma

27 326 Blood is sampled at Visits 0, 4, 9, 11 and will include: A) serum+plasma archiving, B) serum workup.

29 327 Laboratory panel testing will comprise sodium, potassium, chloride, urea, creatinine, glucose,

31 328 calcium, phosphate, total protein and albumin, AST, ALT, ALP, **GGT**, bilirubin, lipid panel, HS-CRP,

33 329 blood cell count with differential count, INR, urine analysis (sediment and biochemistry). One plasma

35 330 and one serum aliquots are made at these visits and frozen for forensic reasons.  
36  
37  
38

39 331

#### 41 332 Psychological evaluation

43 333 It is performed during Visit 0 and Visit 11 using a structured questionnaire evaluated by a qualified

45 334 psychologist.  
46  
47  
48

49 335

#### 50 336 Dietary questionnaire & advice, evaluation of food records

52 337 It is performed by nutritional therapists at Visit 4 and 9 and includes: evaluation of food records will

54 338 include: overall daily energy intake, proteins, carbohydrates and lipids calculations and dietary fibre.  
55  
56  
57

58 339

#### 59 340 Gut microbiome composition

60



1  
2  
3 341 Faecal samples are collected at home by the subjects in the same way as described for donors above  
4  
5 342 and at time points indicated in sections above. If not immediately brought to the visit, the stool is  
6  
7 343 frozen in a home freezer and then transported in a frozen tube container. DNA extraction is  
8  
9 344 performed using the PowerSoil kit (Qiagen), and the bacteriome characterised by 16S rDNA amplicon  
10  
11 345 profiling using the tagged primers according to Schloss protocol [17], and sequencing on a MiSeq  
12  
13 346 instrument with the 2x250 bases sequencing kit (both Illumina, USA).  
14  
15  
16  
17 347

18 348 The first steps of bioinformatic analysis will be performed in the DADA2 package[18]. Statistical  
19  
20 349 analyses and visualisation will be then performed in R with its Phyloseq package. The functional  
21  
22 350 potential of the bacteriome will be assessed using the PICRUST software, which predicts functional  
23  
24 351 capabilities based on the 16S rDNA profiles.  
25  
26  
27  
28 352

29  
30 353 The virome is assessed in a total of four stool samples per patient at Visit 0, 4, 9 and 11. The aim of  
31  
32 354 this analysis is to assess the repertoire of major bacteriophages. The virome analysis is based on  
33  
34 355 metagenomic sequencing of total DNA from a virus-enriched stool sample, according to the  
35  
36 356 previously published protocol [[19]].  
37  
38  
39 357

40  
41 358 Finally, a simple PCR-based semi-quantitative parasite screening aims to identify several mostly  
42  
43 359 benign unicellular parasites (e.g. *Blastocystis*, *Dientamoeba*, *Entamoeba*, *Endolimax*).  
44  
45  
46 360

### 47 361 **Safety monitoring**

48  
49 362 All data are regularly monitored by the research team for any adverse events, and all potential  
50  
51 363 adverse events are recorded. Contacts to study coordinators active 24/7 are provided in case adverse  
52  
53 364 effects occurred. If any concerns are identified during the screening or clinical assessment of donors  
54  
55 365 or recipients, further clinical evaluation and/or examination is immediately realised. All the concerns  
56  
57 366 during the study are assessed, and the recipient will be withdrawn if this is thought to be in his best  
58  
59  
60

1  
2  
3 367 interest. A Data Monitoring and Safety Committee (DMSC) has been established and based on the  
4  
5 368 data from planned interim analysis has the right to terminate the study if the frequency of severe  
6  
7 369 adverse events crosses the 5% line (for closer description of DMSC, its responsibilities and premature  
8  
9  
10 370 termination of the study see **Appendix 2**).

11  
12 371

### 14 372 **Sample size and power calculation**

16 373 The study is powered to detect an absolute improvement of 62.5 points in IBS-SSS score over 8  
17  
18 374 weeks (which is 25% of the expected mean baseline score 250) between the active microbiota  
19  
20 375 intervention compared to placebo. With a sample size of 33 per group, the probability of detecting  
21  
22 376 such an improvement is at least 0.9. This calculation assumes 20% dropout rates, variance in IBS-SSS  
23  
24 377 scores 100 (see the results in [20]), a correlation between the final and baseline IBS-SSS scores 0  
25  
26 378 (with a positive correlation, the power is higher), and no carry-over or temporal effect.

27  
28  
29  
30 379

### 32 380 **Data management**

34 381 Data from IBS-SSS, frequency of urgent defecations, Bristol stool scale, abdominal pain and bloating  
35  
36 382 are collected and stored via the application Survey Monkey. All anthropometric data are entered and  
37  
38 383 stored in password-protected platforms integrated within the hospital information system. Only the  
39  
40 384 researchers involved in the study have access to the final study dataset (IBS-SSS, frequency of urgent  
41  
42 385 defecations, Bristol stool scale, abdominal pain and bloating), which will be shared in an anonymised  
43  
44 386 form via the Zenodo repository. The only data in this manuscript are bacteriome data; their  
45  
46 387 anonymised form will be available on reasonable request.

47  
48  
49  
50 388

### 52 389 **Statistical analyses**

54 390 The primary outcome analysis will be based on the difference in IBS-SSS scores over the second  
55  
56 391 treatment period (week 14 vs week 8) minus the change over the first treatment period (week 5 vs  
57  
58 392 week -1). This difference will be used as a response in a linear model, with intercept corresponding to

1  
2  
3 393 the temporal effect (seen in the placebo group C), an indicator of group A corresponding to the cross-  
4  
5 394 over effect (resulting from administration of placebo after active microbiota) and differences in  
6  
7 395 indicators for groups A and B modelling the effect of active microbiota. A robust sandwich estimator  
8  
9  
10 396 of the variance matrix will be used to adjust for potentially unequal variances between the groups.  
11  
12 397 Analyses of secondary outcomes will proceed by similar methodology, comparing absolute or relative  
13  
14 398 differences of the post-intervention measure of each outcome relative to its baseline value. The  
15  
16 399 CONSORT 2010 guidelines will be followed in reporting the main trial results.

400

#### 401 **Study status**

402 The study was registered at [clinicaltrials.gov](https://clinicaltrials.gov) (NCT04899869) on May 25th 2021. The first patient was  
403 recruited on June 17th 2021, and the first intervention was applied on July 29<sup>th</sup> 2021. As of August  
404 17<sup>th</sup> 2021, 12 patients have signed the informed consent, and six interventions have been applied. It  
405 is expected that the study will be completed in December 2022.

406

#### 407 **Patient and public involvement**

408 Information on the study has been spread at conferences, in newspapers and by local  
409 gastroenterologists contacted by researchers. Everyone interested got information material, which  
410 allowed the potential subjects to read about the study and reach the researchers if they wanted to  
411 participate. Participants were not involved in the development, recruitment of other participants or  
412 conduct of the study. All recipients are asked about any possible adverse effects of treatment at  
413 regular visits planned according to **Figure 1**; a thorough investigation will be conducted if any occurs.  
414 After completing the data analysis, all recipients will receive information about their results and be  
415 offered a roll-over (receiving active study microbiota mixture).

416

1  
2  
3 417 **ETHICS AND DISSEMINATION**  
4

5 418 Ethics approval for this study was granted in June 2018 by the Ethics Committee of the Institute for  
6  
7 419 Clinical and Experimental Medicine and Thomayer Hospital (Víteňská 800, 140 59 Prague 4, Czech  
8  
9 420 Republic). Involvement in this study is completely voluntary; donors and recipients are required to  
10  
11 421 provide written informed consent prior to participation in the study (see **Appendix 3 and 4**).  
12  
13 422 Recipients and their caregivers are informed of unexpected findings or unrecognised conditions and  
14  
15 423 by possible future usage of their specimens in ancillary studies by trained physician or nurse; further  
16  
17 424 medical care will be arranged. Study donors received financial compensation to pay for the required  
18  
19 425 travelling costs when donating the stool. The patient will be offered a roll-over into an observational  
20  
21 426 study with the administration of active microbiota. The patients are informed of this option at the  
22  
23 427 start of the study and regularly reminded.  
24  
25  
26  
27

28 428 We aim to publish findings in impact peer-reviewed international journals. Gastroenterologists,  
29  
30 429 internists and other care providers will be informed through the national conference meetings,  
31  
32 430 journals and patient groups meetings.  
33  
34  
35

36 431

37  
38  
39 432 **Protocol amendment number:** 01. Modification of the study protocol will be communicated with the  
40  
41 433 Ethics committee.  
42  
43

44 434 **Registration details** This study is registered with ClinicalTrials.gov (NCT04899869).  
45  
46

47 435 **Acknowledgement** We thank Peter Holger Johnsen, Linn Skjevling and Hege Hansen from University  
48  
49 436 Hospital of North Norway Harstad, Norway and Rasmus Goll from University Hospital of North  
50  
51 437 Norway Tromsø, Norway, for valuable advice regarding the study design and study microbiota  
52  
53 438 mixture preparation. We also thank Marcela Krutova, Jan Tkadlec, Daniela Lzicarova, Kamila  
54  
55 439 Dundrova, Marie Brajerova, Milena Antuskova, Barbora Dravotova, Jana Prasilova, Jana Sumova and  
56  
57 440 Ales Briksi all from Department of Medical microbiology, 2<sup>nd</sup> Faculty of Medicine, Charles University  
58  
59  
60

1  
2  
3 441 and Motol University Hospital, Prague for their laboratory work in the regular microbiological  
4  
5 442 screening of the study donors.  
6  
7

8 443 **Contributors** OC, PK, JH, JV, MK contributed to the conception and design of the study. OC, PK, JH  
9  
10 444 and JV drafted the protocol with input from all other authors. JV and PK contributed to the patients  
11  
12 445 recruitment. JH, LV, LK and OC contributed to the microbiome analysis for donor selection. JH, OC  
13  
14 446 and JV contributed to the donor screening. LV, JH and OC contributed to the study microbiota  
15  
16 447 mixture preparation. MK contributed to the power size calculations and statistical analysis. VL  
17  
18 448 contributed to the randomization. JH and JV contributed equally to this paper, OC and PK contributed  
19  
20 449 equally either.  
21  
22  
23

24 450 **Funding** This research received funding from the Ministry of Health of the Czech Republic, grant Nr.  
25  
26 451 19-01-00127 . Funding received from this grant support direct research cost. All rights reserved  
27  
28  
29

30 452 **Competing interests** None declared. No money from commercial sponsors was used.  
31  
32

33 453 **Patient consent for publication** Not required.  
34  
35

36 454 **Ethics approval** Ethics approval for this study was granted in June 2018 by the Ethics Committee of  
37  
38 455 the Institut for Clinical and Experimental Medicine and Thomayer Hospital (Víteňská 800, 140 59  
39  
40 456 Prague 4, Czech Republic).  
41  
42  
43

44 457 **Provenance and peer review** Not commissioned; externally peer-reviewed.  
45  
46

47 458 **Open Access** This is an open access article distributed in accordance with the Creative Commons  
48  
49 459 Attribution Non Commercial (CC BY-NC 4.0) license, which permits others to distribute, remix, adapt,  
50  
51 460 build upon this work non-commercially, and license their derivative works on different terms,  
52  
53 461 provided the original work is properly cited, appropriate credit is given, any changes made indicated,  
54  
55 462 and the use is non-commercial. See: <http://creativecommons.org/licenses/by-nc/4.0/>.  
56  
57  
58  
59  
60

1  
2  
3 463 **FIGURES AND ILLUSTRATIONS**

4 464 **Figure 1** Per protocol intervention scheme: the visits, questionnaires and samples  
5  
6  
7  
8  
9  
10  
11  
12  
13  
14  
15  
16  
17  
18  
19  
20  
21  
22  
23  
24  
25  
26  
27  
28  
29  
30  
31  
32  
33  
34  
35  
36  
37  
38  
39  
40  
41  
42  
43  
44  
45  
46  
47  
48  
49  
50  
51  
52  
53  
54  
55  
56  
57  
58  
59  
60

For peer review only

1  
2  
3 465 **Figure 2** Ordination plot on the weighted Unifrac distance at the genus level for selection of the  
4 466 donor candidates based on their gut microbiome alpha- and beta-diversity  
5 467

6 468 These are the results of a comparative microbiome case-control study which helped us to preselect 14 donor candidates.  
7 469 Alpha diversity calculation was based on Chao 1 index. The beta-diversity calculation was based on non-metric dimensional  
8 470 scaling (NMDS) with weighted UniFrac distance matrix for bacterial Genus. NMDS axis 1 captured 46.8% of variability;  
9 471 NMDS axis 2 represents 14.7% of the variability. Healthy subjects were enriched in negative values of the first ordination  
10 472 axis; therefore, we selected donors among healthy subjects in this half of the graph and based on their microbiome's alpha  
11 473 diversity. The reason for concentrating healthy and enriched subjects in the left part of the plot could be their younger age.  
12  
13  
14  
15  
16  
17  
18  
19  
20  
21  
22  
23  
24  
25  
26  
27  
28  
29  
30  
31  
32  
33  
34  
35  
36  
37  
38  
39  
40  
41  
42  
43  
44  
45  
46  
47  
48  
49  
50  
51  
52  
53  
54  
55  
56  
57  
58  
59  
60

For peer review only

1  
2  
3 475 **Figure 3** Process of donor selection and reasons for their excluding  
4  
5  
6  
7  
8  
9  
10  
11  
12  
13  
14  
15  
16  
17  
18  
19  
20  
21  
22  
23  
24  
25  
26  
27  
28  
29  
30  
31  
32  
33  
34  
35  
36  
37  
38  
39  
40  
41  
42  
43  
44  
45  
46  
47  
48  
49  
50  
51  
52  
53  
54  
55  
56  
57  
58  
59  
60

For peer review only



476 **Table 1.** Inclusion and exclusion criteria for FMT donors

|                  |                                                                                                                                                                                                                                                              |
|------------------|--------------------------------------------------------------------------------------------------------------------------------------------------------------------------------------------------------------------------------------------------------------|
| <b>Inclusion</b> | Adults aged 18-65 years                                                                                                                                                                                                                                      |
|                  | BMI 18,5-27 kg/m <sup>2</sup>                                                                                                                                                                                                                                |
|                  | Lack of restrictive diets (diet discussed with experienced gastroenterologist)                                                                                                                                                                               |
|                  | Bristol stool scale usually between 3 and 4                                                                                                                                                                                                                  |
|                  | High alpha diversity and significant difference in beta-diversity from patients (using 16S rDNA sequencing)                                                                                                                                                  |
|                  | Expected to donate regularly                                                                                                                                                                                                                                 |
|                  | Consented in writing                                                                                                                                                                                                                                         |
| <b>Exclusion</b> | Any chronic GI disease in patient's history (coeliac disease, inflammatory bowel disease, irritable bowel syndrome, colorectal carcinoma), or active acute GI issues (infectious gastroenteritis or enterocolitis, frequent bloating, diarrhoea or vomiting) |
|                  | Chronic disease in ' 'patient's history (cancer, autoimmune conditions, type 2 diabetes mellitus, coronary heart disease, hypertension, hypercholesterolemia, gout)                                                                                          |
|                  | <i>Clostridiodes difficile</i> infection in patient's history                                                                                                                                                                                                |
|                  | Colorectal carcinoma in family history                                                                                                                                                                                                                       |
|                  | Any restrictive diet habits (raw-vegans, fruitarians, keto or carnivore)                                                                                                                                                                                     |
|                  | Any systemic antibiotics in the last 6 months                                                                                                                                                                                                                |
|                  | Using proton-pump inhibitors in the last 6 months                                                                                                                                                                                                            |
|                  | Regular unprotected sex with unknown persons                                                                                                                                                                                                                 |

477

478 **Table 2** Laboratory screening of the FMT donors

|                                                                                                                                                                                                                         |
|-------------------------------------------------------------------------------------------------------------------------------------------------------------------------------------------------------------------------|
| <b>Blood testing</b>                                                                                                                                                                                                    |
| Hepatitis A, hepatitis B, hepatitis C and hepatitis E viruses (serology)                                                                                                                                                |
| HIV-1 and HIV-2 (p24 antigen)                                                                                                                                                                                           |
| Treponema pallidum (serology)                                                                                                                                                                                           |
| Strongyloides stercoralis (serology)                                                                                                                                                                                    |
| Complete blood cell count with differential                                                                                                                                                                             |
| Creatinine, aminotransferases, bilirubin                                                                                                                                                                                |
| <b>Stool testing</b>                                                                                                                                                                                                    |
| <i>Clostridioides difficile</i> (cultures, antigen testing)                                                                                                                                                             |
| Common enteric pathogens, including Salmonella, Shigella, Campylobacter, shiga toxin-producing <i>Escherichia coli</i> , Yersinia and <i>Vibrio cholerae</i> (cultures)                                                 |
| Antibiotic-resistant bacteria (ARB), including vancomycin-resistant Enterococci, meticillin-resistant <i>Staphylococcus aureus</i>                                                                                      |
| Gram-negative ARB including extended-spectrum $\beta$ -lactamase-producing <i>Enterobacteriaceae</i> , and carbapenem-resistant <i>Enterobacteriaceae</i> /carbapenemase-producing <i>Enterobacteriaceae</i> (cultures) |
| Norovirus, rotavirus, adenovirus, sapovirus (PCR)                                                                                                                                                                       |
| SARS-CoV-2 (reverse transcription -PCR)                                                                                                                                                                                 |
| Common intestinal parasites, including <i>Giardia intestinalis</i> , <i>Cryptosporidium parvum et hominis</i> (cultures and PCR), <i>Blastocystis hominis</i> *, <i>Dientamoeba fragilis</i> * (both PCR only)          |

479

480 \*) Based on the literature [21], we decided to test both parasites but do not exclude the donors if they tested  
 481 positive and having no gastrointestinal symptoms. *Blastocystis* is believed to be commensal of the gut.  
 482 *Dientamoeba's* status is not exact; however, based on our experiment, it does not survive freezing at -80 °C and  
 483 thawing to 5°C when mixing the study microbiota mixture. Therefore it can't do any harm.

484

485 The screening strategy is based on [14].

486 **Table 3.** Inclusion and exclusion criteria for recipients of FMT

|           |                                                                                                                                                           |
|-----------|-----------------------------------------------------------------------------------------------------------------------------------------------------------|
| Inclusion | Adults 18-65 years                                                                                                                                        |
|           | Diagnosed with IBS-D or IBS-M according to the Rome IV criteria                                                                                           |
|           | Expected adherence to following the protocol                                                                                                              |
|           | Written consent to the study                                                                                                                              |
| Exclusion | The use of antibiotics and probiotics within one month prior to faecal microbiota transplantation                                                         |
|           | History of inflammatory bowel disease or gastrointestinal malignancy, systemic autoimmune diseases (ongoing or in history)                                |
|           | Previous abdominal surgery (other than appendectomy or cholecystectomy or hernioplasty or cesarean section)                                               |
|           | HIV infection or other active infection                                                                                                                   |
|           | Renal or hepatic disease (both defined by biochemistry workup)                                                                                            |
|           | Diabetes mellitus, abnormal thyroid functions not controlled by thyroid medications                                                                       |
|           | Bipolar disorder or schizophrenia (ongoing or history thereof), moderately severe depression defined by Patient Health Questionnaire-9 (PHQ-9) score > 15 |
|           | Anxiety defined by a Generalised Anxiety Disorder 7 (GAD7) score > 10, with any organic causes that can explain the symptoms of IBS                       |
|           | Current pregnancy and lactation                                                                                                                           |

487

488 **Table 4.** The study visits with planned activities

| Visit                                                                                   | 0 | 1  | X  | 2+3 | 4 | X | 5 | 6 | 7+8 | 9  | X  | 10 | 11 |
|-----------------------------------------------------------------------------------------|---|----|----|-----|---|---|---|---|-----|----|----|----|----|
| <b>Study Week</b>                                                                       | ? | -2 | -1 | 1   | 2 | 3 | 5 | 8 | 9   | 10 | 11 | 13 | 32 |
| Eligibility evaluation (E) /<br>Randomization (R) /<br>Wrap-up visit (W) <sup>(1)</sup> | E | R  |    |     |   |   |   |   |     |    |    |    | W  |
| Colon enema with the<br>study substance (active<br>microbiota or placebo)               |   |    |    | XX  |   |   |   |   | XX  |    |    |    |    |
| Irritable bowel syndrome<br>severity scale score                                        |   | X  | X  |     |   | X | X | X |     |    | X  | X  | X  |
| Weight, height,<br>bioimpedance                                                         |   | X  |    |     | X |   | X |   |     | X  |    | X  | X  |
| Detailed anthropometry                                                                  |   | X  |    |     |   |   | X |   |     |    |    | X  | X  |
| Serum workup, archiving<br>serum+plasma                                                 |   | X  |    |     | X |   |   |   |     | X  |    |    | X  |
| Psychological evaluation                                                                |   | X  |    |     |   |   |   |   |     |    |    |    | X  |
| Dietary questionnaire &<br>advice, evaluation of<br>food records <sup>(2)</sup>         |   |    |    |     | X |   |   |   |     | X  |    |    |    |
| Stool samples for<br>bacteriome profiling<br>using 16S rDNA<br>sequencing               | X | X  | X  |     | X | X | X | X |     | X  | X  | X  | X  |

489 (1) Here, the patient is offered a roll-over into an observational study with active microbiota administration. The patients  
490 will be informed of this option at the start of the study and regularly reminded.

491 (2) For IBS-SSS questionnaires assessing the primary outcome, please see the intervention scheme in Figure 2. Their  
492 administering is not linked to study visits.

## 493 REFERENCES

- 494
- 495 1. Lacy BE, Mearin F, Chang L, Chey WD, Lembo AJ, Simren M, et al. Bowel Disorders.
- 496 Gastroenterology. 2016; 150(6):1393-1407.150.
- 497 2. Lovell RM, Ford AC. Global prevalence of and risk factors for irritable bowel syndrome: a
- 498 meta-analysis. Clin Gastroenterol Hepatol. 2012;10 7:712-21.
- 499 3. Rajilic-Stojanovic M, Jonkers DM, Salonen A, Hanevik K, Raes J, Jalanka J, et al. Intestinal
- 500 microbiota and diet in IBS: causes, consequences, or epiphenomena? Am J Gastroenterol.
- 501 2015;110 2:278-87.
- 502 4. Kelly CP. Fecal microbiota transplantation--an old therapy comes of age. N Engl J Med.
- 503 2013;368 5:474-5.
- 504 5. Johnsen PH, Hilpusch F, Cavanagh JP, Leikanger IS, Kolstad C, Valle PC, et al. Faecal
- 505 microbiota transplantation versus placebo for moderate-to-severe irritable bowel syndrome:
- 506 a double-blind, randomised, placebo-controlled, parallel-group, single-centre trial. Lancet
- 507 Gastroenterol Hepatol. 2018;3 1:17-24. 6. El-Salhy M, Hatlebakk JG, Gilja OH, Brathen
- 508 Kristoffersen A, Hausken T. Efficacy of faecal microbiota transplantation for patients with
- 509 irritable bowel syndrome in a randomised, double-blind, placebo-controlled study. Gut.
- 510 2020;69 5:859-67.
- 511 7. Halkjaer SI, Christensen AH, Lo BZS, Browne PD, Gunther S, Hansen LH, et al. Faecal
- 512 microbiota transplantation alters gut microbiota in patients with irritable bowel syndrome:
- 513 results from a randomised, double-blind placebo-controlled study. Gut. 2018;67 12:2107-15.
- 514 8. Aroniadis OC, Brandt LJ, Oneto C, Feuerstadt P, Sherman A, Wolkoff AW, et al. Faecal
- 515 microbiota transplantation for diarrhoea-predominant irritable bowel syndrome: a double-
- 516 blind, randomised, placebo-controlled trial. Lancet Gastroenterol Hepatol. 2019;4 9:675-85.
- 517 9. Holster S, Lindqvist CM, Reptsilber D, Salonen A, de Vos WM, Konig J, et al. The Effect of
- 518 Allogenic Versus Autologous Fecal Microbiota Transfer on Symptoms, Visceral Perception
- 519 and Fecal and Mucosal Microbiota in Irritable Bowel Syndrome: A Randomized Controlled
- 520 Study. Clin Transl Gastroenterol. 2019;10 4:e00034.
- 521 10. Lahtinen P, Jalanka J, Hartikainen A, Mattila E, Hillila M, Punkkinen J, et al. Randomised
- 522 clinical trial: faecal microbiota transplantation versus autologous placebo administered via
- 523 colonoscopy in irritable bowel syndrome. Aliment Pharmacol Ther. 2020;51 12:1321-31.
- 524 11. Holvoet T, Joossens M, Vazquez-Castellanos JF, Christiaens E, Heyerick L, Boelens J, et al.
- 525 Fecal Microbiota Transplantation Reduces Symptoms in Some Patients With Irritable Bowel
- 526 Syndrome With Predominant Abdominal Bloating: Short- and Long-term Results From a
- 527 Placebo-Controlled Randomized Trial. Gastroenterology. 2021;160 1:145-57 e8.
- 528 12. Wu J, Lv L, Wang C. Efficacy of Fecal Microbiota Transplantation in Irritable Bowel Syndrome:
- 529 A Meta-Analysis of Randomized Controlled Trials. Front Cell Infect Microbiol.
- 530 2022;12:827395.
- 531 13. Chan AW, Tetzlaff JM, Altman DG, Laupacis A, Gotzsche PC, Krleza-Jeric K, et al. SPIRIT 2013
- 532 statement: defining standard protocol items for clinical trials. Ann Intern Med. 2013;158
- 533 3:200-7.
- 534 14. Cammarota G, Ianiro G, Kelly CR, Mullish BH, Allegretti JR, Kassam Z, et al. International
- 535 consensus conference on stool banking for faecal microbiota transplantation in clinical
- 536 practice. Gut. 2019;68 12:2111-21.
- 537 15. Nanjing consensus on methodology of washed microbiota transplantation. Chin Med J (Engl).
- 538 2020;133 19:2330-2.
- 539

- 1  
2  
3 540 16. Francis CY, Morris J, Whorwell PJ. The irritable bowel severity scoring system: a simple  
4 541 method of monitoring irritable bowel syndrome and its progress. *Aliment Pharmacol Ther.*  
5 542 1997;11 2:395-402.  
6 543 17. Kozich JJ, Westcott SL, Baxter NT, Highlander SK, Schloss PD. Development of a dual-index  
7 544 sequencing strategy and curation pipeline for analyzing amplicon sequence data on the  
8 545 MiSeq Illumina sequencing platform. *Appl Environ Microbiol.* 2013;79 17:5112-20.  
9  
10 546 18. Callahan BJ, McMurdie PJ, Rosen MJ, Han AW, Johnson AJ, Holmes SP. DADA2: High-  
11 547 resolution sample inference from Illumina amplicon data. *Nat Methods.* 2016;13 7:581-3.  
12  
13 548 19. Kramna L, Cinek O. Virome Sequencing of Stool Samples. *Methods Mol Biol.* 2018;1838:59-  
14 549 83.  
15 550 20. Palsson OS, Baggish JS, Turner MJ, Whitehead WE. IBS patients show frequent fluctuations  
16 551 between loose/watery and hard/lumpy stools: implications for treatment. *Am J*  
17 552 *Gastroenterol.* 2012;107 2:286-95.  
18 553 21. Stensvold CR, van der Giezen M. Associations between Gut Microbiota and Common Luminal  
19 554 Intestinal Parasites. *Trends Parasitol.* 2018;34 5:369-77.  
20  
21  
22 555  
23  
24  
25  
26  
27  
28  
29  
30  
31  
32  
33  
34  
35  
36  
37  
38  
39  
40  
41  
42  
43  
44  
45  
46  
47  
48  
49  
50  
51  
52  
53  
54  
55  
56  
57  
58  
59  
60

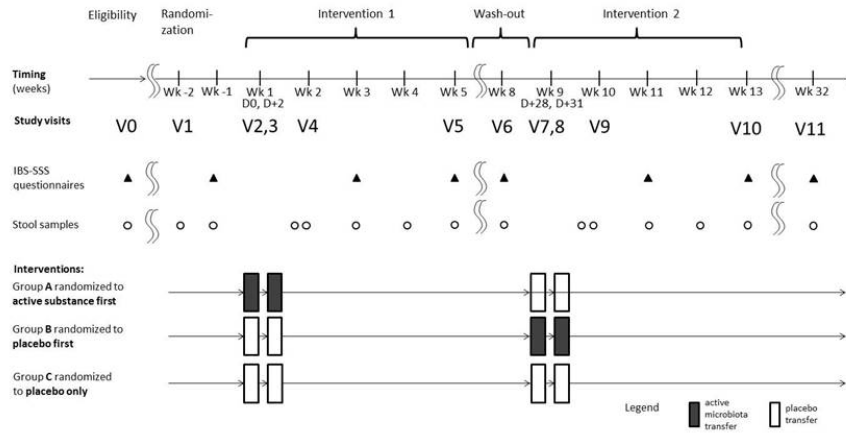

31 Per protocol intervention scheme: the visits, questionnaires and samples

32 254x190mm (96 x 96 DPI)

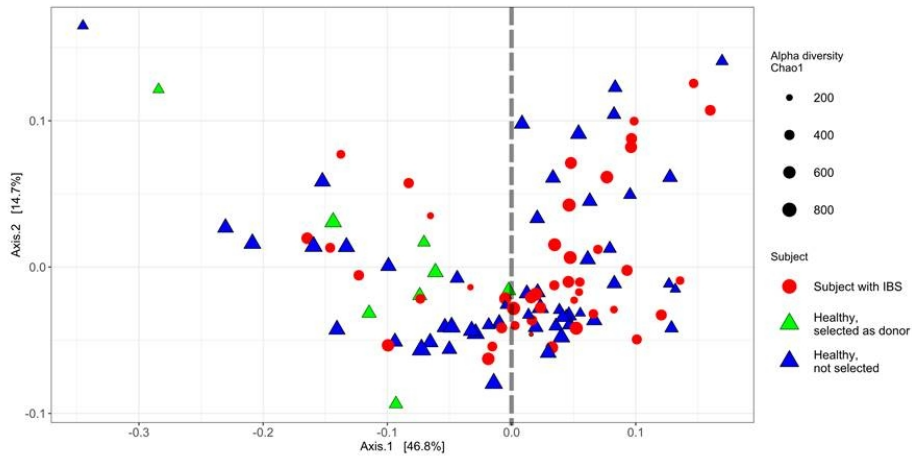

Ordination plot on the weighted UniFrac distance at the genus level for selection of the donor candidates based on their gut microbiome alpha- and beta-diversity. These are the results of a comparative microbiome case-control study that helped us to preselect 14 donor candidates. Alpha diversity calculation was based on Chao 1 index. The beta-diversity calculation was based on non-metric dimensional scaling (NMDS) with a weighted UniFrac distance matrix for bacterial Genus. NMDS axis 1 captured 46.8% of variability; NMDS axis 2 represents 14.7% of the variability. Healthy subjects were enriched in negative values of the first ordination axis; therefore, we selected donors among healthy subjects in this half of the graph and based on their microbiome's alpha diversity. The reason for concentrating healthy and enriched subjects in the left part of the plot could be their younger age.

254x190mm (96 x 96 DPI)



1  
2  
3  
4  
5  
6  
7  
8  
9  
10  
11  
12  
13  
14  
15  
16  
17  
18  
19  
20  
21  
22  
23  
24  
25  
26  
27  
28  
29  
30  
31  
32  
33  
34  
35  
36  
37  
38  
39  
40  
41  
42  
43  
44  
45  
46  
47  
48  
49  
50  
51  
52  
53  
54  
55  
56  
57  
58  
59  
60

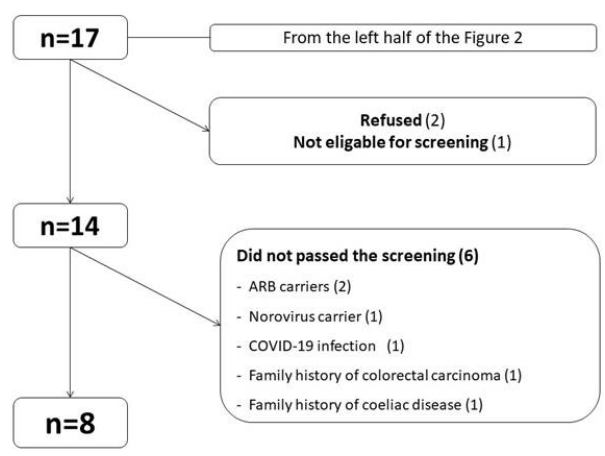

Process of donor selection and reasons for their excluding  
254x190mm (96 x 96 DPI)

# Reporting checklist for protocol of a clinical trial.

Based on the SPIRIT guidelines.

## Appendix 1 SPIRIT CHECKLIST

|                                                         |                     | Reporting Item                                                                                                                                                                                                                                                                           | Page Number            |
|---------------------------------------------------------|---------------------|------------------------------------------------------------------------------------------------------------------------------------------------------------------------------------------------------------------------------------------------------------------------------------------|------------------------|
| <b>Administrative information</b>                       |                     |                                                                                                                                                                                                                                                                                          |                        |
| Title                                                   | <a href="#">#1</a>  | Descriptive title identifying the study design, population, interventions, and, if applicable, trial acronym                                                                                                                                                                             | 1                      |
| Trial registration                                      | <a href="#">#2a</a> | Trial identifier and registry name. If not yet registered, name of intended registry                                                                                                                                                                                                     | 6 and 19               |
| Trial registration: data set                            | <a href="#">#2b</a> | All items from the World Health Organization Trial Registration Data Set                                                                                                                                                                                                                 | NA – not received yet. |
| Protocol version                                        | <a href="#">#3</a>  | Date and version identifier                                                                                                                                                                                                                                                              | 19                     |
| Funding                                                 | <a href="#">#4</a>  | Sources and types of financial, material, and other support                                                                                                                                                                                                                              | 20                     |
| Roles and responsibilities: contributorship             | <a href="#">#5a</a> | Names, affiliations, and roles of protocol contributors                                                                                                                                                                                                                                  | 20                     |
| Roles and responsibilities: sponsor contact information | <a href="#">#5b</a> | Name and contact information for the trial sponsor                                                                                                                                                                                                                                       | 20                     |
| Roles and responsibilities: sponsor and funder          | <a href="#">#5c</a> | Role of study sponsor and funders, if any, in study design; collection, management, analysis, and interpretation of data; writing of the report; and the decision to submit the report for publication, including whether they will have ultimate authority over any of these activities | 20                     |

|    |                           |                      |                                                              |    |
|----|---------------------------|----------------------|--------------------------------------------------------------|----|
| 1  | Roles and                 | <a href="#">#5d</a>  | Composition, roles, and responsibilities of the              | 20 |
| 2  | responsibilities:         |                      | coordinating centre, steering committee, endpoint            |    |
| 3  | committees                |                      | adjudication committee, data management team, and            |    |
| 4  |                           |                      | other individuals or groups overseeing the trial, if         |    |
| 5  |                           |                      | applicable (see Item 21a for data monitoring committee)      |    |
| 6  |                           |                      |                                                              |    |
| 7  |                           |                      |                                                              |    |
| 8  |                           |                      |                                                              |    |
| 9  | <b>Introduction</b>       |                      |                                                              |    |
| 10 |                           |                      |                                                              |    |
| 11 | Background and            | <a href="#">#6a</a>  | Description of research question and justification for       | 7  |
| 12 | rationale                 |                      | undertaking the trial, including summary of relevant         |    |
| 13 |                           |                      | studies (published and unpublished) examining benefits       |    |
| 14 |                           |                      | and harms for each intervention                              |    |
| 15 |                           |                      |                                                              |    |
| 16 |                           |                      |                                                              |    |
| 17 |                           |                      |                                                              |    |
| 18 | Background and            | <a href="#">#6b</a>  | Explanation for choice of comparators                        | 8  |
| 19 | rationale: choice of      |                      |                                                              |    |
| 20 | comparators               |                      |                                                              |    |
| 21 |                           |                      |                                                              |    |
| 22 |                           |                      |                                                              |    |
| 23 | Objectives                | <a href="#">#7</a>   | Specific objectives or hypotheses                            | 8  |
| 24 |                           |                      |                                                              |    |
| 25 |                           |                      |                                                              |    |
| 26 | Trial design              | <a href="#">#8</a>   | Description of trial design including type of trial (eg,     | 9  |
| 27 |                           |                      | parallel group, crossover, factorial, single group),         |    |
| 28 |                           |                      | allocation ratio, and framework (eg, superiority,            |    |
| 29 |                           |                      | equivalence, non-inferiority, exploratory)                   |    |
| 30 |                           |                      |                                                              |    |
| 31 |                           |                      |                                                              |    |
| 32 |                           |                      |                                                              |    |
| 33 | <b>Methods:</b>           |                      |                                                              |    |
| 34 | <b>Participants,</b>      |                      |                                                              |    |
| 35 | <b>interventions, and</b> |                      |                                                              |    |
| 36 | <b>outcomes</b>           |                      |                                                              |    |
| 37 |                           |                      |                                                              |    |
| 38 |                           |                      |                                                              |    |
| 39 | Study setting             | <a href="#">#9</a>   | Description of study settings (eg, community clinic,         | 10 |
| 40 |                           |                      | academic hospital) and list of countries where data will     |    |
| 41 |                           |                      | be collected. Reference to where list of study sites can     |    |
| 42 |                           |                      | be obtained                                                  |    |
| 43 |                           |                      |                                                              |    |
| 44 |                           |                      |                                                              |    |
| 45 |                           |                      |                                                              |    |
| 46 | Eligibility criteria      | <a href="#">#10</a>  | Inclusion and exclusion criteria for participants. If        | 10 |
| 47 |                           |                      | applicable, eligibility criteria for study centres and       |    |
| 48 |                           |                      | individuals who will perform the interventions (eg,          |    |
| 49 |                           |                      | surgeons, psychotherapists)                                  |    |
| 50 |                           |                      |                                                              |    |
| 51 |                           |                      |                                                              |    |
| 52 |                           |                      |                                                              |    |
| 53 | Interventions:            | <a href="#">#11a</a> | Interventions for each group with sufficient detail to allow | 13 |
| 54 | description               |                      | replication, including how and when they will be             |    |
| 55 |                           |                      | administered                                                 |    |
| 56 |                           |                      |                                                              |    |
| 57 |                           |                      |                                                              |    |
| 58 |                           |                      |                                                              |    |
| 59 | Interventions:            | <a href="#">#11b</a> | Criteria for discontinuing or modifying allocated            | 13 |
| 60 |                           |                      |                                                              |    |

|    |                           |                      |                                                            |            |
|----|---------------------------|----------------------|------------------------------------------------------------|------------|
| 1  | modifications             |                      | interventions for a given trial participant (eg, drug dose |            |
| 2  |                           |                      | change in response to harms, participant request, or       |            |
| 3  |                           |                      | improving / worsening disease)                             |            |
| 4  |                           |                      |                                                            |            |
| 5  | Interventions:            | <a href="#">#11c</a> | Strategies to improve adherence to intervention            | 14         |
| 6  | adherence                 |                      | protocols, and any procedures for monitoring adherence     |            |
| 7  |                           |                      | (eg, drug tablet return; laboratory tests)                 |            |
| 8  |                           |                      |                                                            |            |
| 9  |                           |                      |                                                            |            |
| 10 | Interventions:            | <a href="#">#11d</a> | Relevant concomitant care and interventions that are       | 14         |
| 11 | concomitant care          |                      | permitted or prohibited during the trial                   |            |
| 12 |                           |                      |                                                            |            |
| 13 |                           |                      |                                                            |            |
| 14 | Outcomes                  | <a href="#">#12</a>  | Primary, secondary, and other outcomes, including the      | 13         |
| 15 |                           |                      | specific measurement variable (eg, systolic blood          |            |
| 16 |                           |                      | pressure), analysis metric (eg, change from baseline,      |            |
| 17 |                           |                      | final value, time to event), method of aggregation (eg,    |            |
| 18 |                           |                      | median, proportion), and time point for each outcome.      |            |
| 19 |                           |                      | Explanation of the clinical relevance of chosen efficacy   |            |
| 20 |                           |                      | and harm outcomes is strongly recommended                  |            |
| 21 |                           |                      |                                                            |            |
| 22 |                           |                      |                                                            |            |
| 23 |                           |                      |                                                            |            |
| 24 |                           |                      |                                                            |            |
| 25 |                           |                      |                                                            |            |
| 26 | Participant timeline      | <a href="#">#13</a>  | Time schedule of enrolment, interventions (including any   | See Figure |
| 27 |                           |                      | run-ins and washouts), assessments, and visits for         | 1          |
| 28 |                           |                      | participants. A schematic diagram is highly                |            |
| 29 |                           |                      | recommended (see Figure)                                   |            |
| 30 |                           |                      |                                                            |            |
| 31 |                           |                      |                                                            |            |
| 32 |                           |                      |                                                            |            |
| 33 | Sample size               | <a href="#">#14</a>  | Estimated number of participants needed to achieve         | 17         |
| 34 |                           |                      | study objectives and how it was determined, including      |            |
| 35 |                           |                      | clinical and statistical assumptions supporting any        |            |
| 36 |                           |                      | sample size calculations                                   |            |
| 37 |                           |                      |                                                            |            |
| 38 |                           |                      |                                                            |            |
| 39 |                           |                      |                                                            |            |
| 40 | Recruitment               | <a href="#">#15</a>  | Strategies for achieving adequate participant enrolment    | 11         |
| 41 |                           |                      | to reach target sample size                                |            |
| 42 |                           |                      |                                                            |            |
| 43 | <b>Methods:</b>           |                      |                                                            |            |
| 44 | <b>Assignment of</b>      |                      |                                                            |            |
| 45 | <b>interventions (for</b> |                      |                                                            |            |
| 46 | <b>controlled trials)</b> |                      |                                                            |            |
| 47 |                           |                      |                                                            |            |
| 48 |                           |                      |                                                            |            |
| 49 |                           |                      |                                                            |            |
| 50 | Allocation: sequence      | <a href="#">#16a</a> | Method of generating the allocation sequence (eg,          | 12         |
| 51 | generation                |                      | computer-generated random numbers), and list of any        |            |
| 52 |                           |                      | factors for stratification. To reduce predictability of a  |            |
| 53 |                           |                      | random sequence, details of any planned restriction (eg,   |            |
| 54 |                           |                      | blocking) should be provided in a separate document        |            |
| 55 |                           |                      | that is unavailable to those who enrol participants or     |            |
| 56 |                           |                      |                                                            |            |
| 57 |                           |                      |                                                            |            |
| 58 |                           |                      |                                                            |            |
| 59 |                           |                      |                                                            |            |
| 60 |                           |                      |                                                            |            |

assign interventions

|    |                        |                      |                                                             |
|----|------------------------|----------------------|-------------------------------------------------------------|
| 1  |                        |                      |                                                             |
| 2  |                        |                      |                                                             |
| 3  | Allocation             | <a href="#">#16b</a> | Mechanism of implementing the allocation sequence 12        |
| 4  | concealment            |                      | (eg, central telephone; sequentially numbered, opaque,      |
| 5  | mechanism              |                      | sealed envelopes), describing any steps to conceal the      |
| 6  |                        |                      | sequence until interventions are assigned                   |
| 7  |                        |                      |                                                             |
| 8  |                        |                      |                                                             |
| 9  | Allocation:            | <a href="#">#16c</a> | Who will generate the allocation sequence, who will 12      |
| 10 | implementation         |                      | enrol participants, and who will assign participants to     |
| 11 |                        |                      | interventions                                               |
| 12 |                        |                      |                                                             |
| 13 |                        |                      |                                                             |
| 14 | Blinding (masking)     | <a href="#">#17a</a> | Who will be blinded after assignment to interventions 12    |
| 15 |                        |                      | (eg, trial participants, care providers, outcome            |
| 16 |                        |                      | assessors, data analysts), and how                          |
| 17 |                        |                      |                                                             |
| 18 |                        |                      |                                                             |
| 19 |                        |                      |                                                             |
| 20 | Blinding (masking):    | <a href="#">#17b</a> | If blinded, circumstances under which unblinding is 12-13   |
| 21 | emergency unblinding   |                      | permissible, and procedure for revealing a participant's    |
| 22 |                        |                      | allocated intervention during the trial                     |
| 23 |                        |                      |                                                             |
| 24 |                        |                      |                                                             |
| 25 | <b>Methods: Data</b>   |                      |                                                             |
| 26 | <b>collection,</b>     |                      |                                                             |
| 27 | <b>management, and</b> |                      |                                                             |
| 28 | <b>analysis</b>        |                      |                                                             |
| 29 |                        |                      |                                                             |
| 30 |                        |                      |                                                             |
| 31 |                        |                      |                                                             |
| 32 | Data collection plan   | <a href="#">#18a</a> | Plans for assessment and collection of outcome, 14-17       |
| 33 |                        |                      | baseline, and other trial data, including any related       |
| 34 |                        |                      | processes to promote data quality (eg, duplicate            |
| 35 |                        |                      | measurements, training of assessors) and a description      |
| 36 |                        |                      | of study instruments (eg, questionnaires, laboratory        |
| 37 |                        |                      | tests) along with their reliability and validity, if known. |
| 38 |                        |                      | Reference to where data collection forms can be found,      |
| 39 |                        |                      | if not in the protocol                                      |
| 40 |                        |                      |                                                             |
| 41 |                        |                      |                                                             |
| 42 |                        |                      |                                                             |
| 43 |                        |                      |                                                             |
| 44 |                        |                      |                                                             |
| 45 | Data collection plan:  | <a href="#">#18b</a> | Plans to promote participant retention and complete 14      |
| 46 | retention              |                      | follow-up, including list of any outcome data to be         |
| 47 |                        |                      | collected for participants who discontinue or deviate       |
| 48 |                        |                      | from intervention protocols                                 |
| 49 |                        |                      |                                                             |
| 50 |                        |                      |                                                             |
| 51 |                        |                      |                                                             |
| 52 | Data management        | <a href="#">#19</a>  | Plans for data entry, coding, security, and storage, 18     |
| 53 |                        |                      | including any related processes to promote data quality     |
| 54 |                        |                      | (eg, double data entry; range checks for data values).      |
| 55 |                        |                      | Reference to where details of data management               |
| 56 |                        |                      | procedures can be found, if not in the protocol             |
| 57 |                        |                      |                                                             |
| 58 |                        |                      |                                                             |
| 59 |                        |                      |                                                             |
| 60 |                        |                      |                                                             |

|    |                            |                      |                                                              |          |
|----|----------------------------|----------------------|--------------------------------------------------------------|----------|
| 1  | Statistics: outcomes       | <a href="#">#20a</a> | Statistical methods for analysing primary and secondary      | 18       |
| 2  |                            |                      | outcomes. Reference to where other details of the            |          |
| 3  |                            |                      | statistical analysis plan can be found, if not in the        |          |
| 4  |                            |                      | protocol                                                     |          |
| 5  |                            |                      |                                                              |          |
| 6  |                            |                      |                                                              |          |
| 7  |                            |                      |                                                              |          |
| 8  | Statistics: additional     | <a href="#">#20b</a> | Methods for any additional analyses (eg, subgroup and        | 18       |
| 9  | analyses                   |                      | adjusted analyses)                                           |          |
| 10 |                            |                      |                                                              |          |
| 11 | Statistics: analysis       | <a href="#">#20c</a> | Definition of analysis population relating to protocol non-  | 18       |
| 12 | population and             |                      | adherence (eg, as randomised analysis), and any              |          |
| 13 | missing data               |                      | statistical methods to handle missing data (eg, multiple     |          |
| 14 |                            |                      | imputation)                                                  |          |
| 15 |                            |                      |                                                              |          |
| 16 |                            |                      |                                                              |          |
| 17 |                            |                      |                                                              |          |
| 18 | <b>Methods: Monitoring</b> |                      |                                                              |          |
| 19 |                            |                      |                                                              |          |
| 20 |                            |                      |                                                              |          |
| 21 | Data monitoring:           | <a href="#">#21a</a> | Composition of data monitoring committee (DMC);              | Appendix |
| 22 | formal committee           |                      | summary of its role and reporting structure; statement of    | 1        |
| 23 |                            |                      | whether it is independent from the sponsor and               |          |
| 24 |                            |                      | competing interests; and reference to where further          |          |
| 25 |                            |                      | details about its charter can be found, if not in the        |          |
| 26 |                            |                      | protocol. Alternatively, an explanation of why a DMC is      |          |
| 27 |                            |                      | not needed                                                   |          |
| 28 |                            |                      |                                                              |          |
| 29 |                            |                      |                                                              |          |
| 30 |                            |                      |                                                              |          |
| 31 |                            |                      |                                                              |          |
| 32 | Data monitoring:           | <a href="#">#21b</a> | Description of any interim analyses and stopping             | Appendix |
| 33 | interim analysis           |                      | guidelines, including who will have Access to these          | 1        |
| 34 |                            |                      | interim results and make the final decision to terminate     |          |
| 35 |                            |                      | the trial                                                    |          |
| 36 |                            |                      |                                                              |          |
| 37 |                            |                      |                                                              |          |
| 38 |                            |                      |                                                              |          |
| 39 | Harms                      | <a href="#">#22</a>  | Plans for collecting, assessing, reporting, and managing     | 17       |
| 40 |                            |                      | solicited and spontaneously reported adverse events          |          |
| 41 |                            |                      | and other unintended effects of trial interventions or trial |          |
| 42 |                            |                      | conduct                                                      |          |
| 43 |                            |                      |                                                              |          |
| 44 |                            |                      |                                                              |          |
| 45 |                            |                      |                                                              |          |
| 46 | Auditing                   | <a href="#">#23</a>  | Frequency and procedures for auditing trial conduct, if      | 20       |
| 47 |                            |                      | any, and whether the process will be independent from        |          |
| 48 |                            |                      | investigators and the sponsor                                |          |
| 49 |                            |                      |                                                              |          |
| 50 |                            |                      |                                                              |          |
| 51 | <b>Ethics and</b>          |                      |                                                              |          |
| 52 | <b>dissemination</b>       |                      |                                                              |          |
| 53 |                            |                      |                                                              |          |
| 54 |                            |                      |                                                              |          |
| 55 | Research ethics            | <a href="#">#24</a>  | Plans for seeking research ethics committee /                | 19       |
| 56 | approval                   |                      | institutional review board (REC / IRB) approval              |          |
| 57 |                            |                      |                                                              |          |
| 58 |                            |                      |                                                              |          |
| 59 | Protocol amendments        | <a href="#">#25</a>  | Plans for communicating important protocol                   | 20       |
| 60 |                            |                      |                                                              |          |

modifications (eg, changes to eligibility criteria, outcomes, analyses) to relevant parties (eg, investigators, REC / IRBs, trial participants, trial registries, journals, regulators)

|    |                          |                      |                                                               |
|----|--------------------------|----------------------|---------------------------------------------------------------|
| 1  |                          |                      |                                                               |
| 2  |                          |                      |                                                               |
| 3  |                          |                      |                                                               |
| 4  |                          |                      |                                                               |
| 5  |                          |                      |                                                               |
| 6  |                          |                      |                                                               |
| 7  | Consent or assent        | <a href="#">#26a</a> | Who will obtain informed consent or assent from 19            |
| 8  |                          |                      | potential trial participants or authorised surrogates, and    |
| 9  |                          |                      | how (see Item 32)                                             |
| 10 |                          |                      |                                                               |
| 11 |                          |                      |                                                               |
| 12 | Consent or assent:       | <a href="#">#26b</a> | Additional consent provisions for collection and use of 19    |
| 13 | ancillary studies        |                      | participant data and biological specimens in ancillary        |
| 14 |                          |                      | studies, if applicable                                        |
| 15 |                          |                      |                                                               |
| 16 |                          |                      |                                                               |
| 17 | Confidentiality          | <a href="#">#27</a>  | How personal information about potential and enrolled 19      |
| 18 |                          |                      | participants will be collected, shared, and maintained in     |
| 19 |                          |                      | order to protect confidentiality before, during, and after    |
| 20 |                          |                      | the trial                                                     |
| 21 |                          |                      |                                                               |
| 22 |                          |                      |                                                               |
| 23 |                          |                      |                                                               |
| 24 | Declaration of           | <a href="#">#28</a>  | Financial and other competing interests for principal 20      |
| 25 | interests                |                      | investigators for the overall trial and each study site       |
| 26 |                          |                      |                                                               |
| 27 |                          |                      |                                                               |
| 28 | Data access              | <a href="#">#29</a>  | Statement of who will have Access to the final trial 18       |
| 29 |                          |                      | dataset, and disclosure of contractual agreements that        |
| 30 |                          |                      | limit such Access for investigators                           |
| 31 |                          |                      |                                                               |
| 32 |                          |                      |                                                               |
| 33 | Ancillary and post trial | <a href="#">#30</a>  | Provisions, if any, for ancillary and post-trial care, and 19 |
| 34 | care                     |                      | for compensation to those who suffer harm from trial          |
| 35 |                          |                      | participation                                                 |
| 36 |                          |                      |                                                               |
| 37 |                          |                      |                                                               |
| 38 |                          |                      |                                                               |
| 39 | Dissemination policy:    | <a href="#">#31a</a> | Plans for investigators and sponsor to communicate trial 19   |
| 40 | trial results            |                      | results to participants, healthcare professionals, the        |
| 41 |                          |                      | public, and other relevant groups (eg, via publication,       |
| 42 |                          |                      | reporting in results databases, or other data sharing         |
| 43 |                          |                      | arrangements), including any publication restrictions         |
| 44 |                          |                      |                                                               |
| 45 |                          |                      |                                                               |
| 46 |                          |                      |                                                               |
| 47 | Dissemination policy:    | <a href="#">#31b</a> | Authorship eligibility guidelines and any intended use of 20  |
| 48 | authorship               |                      | professional writers                                          |
| 49 |                          |                      |                                                               |
| 50 |                          |                      |                                                               |
| 51 | Dissemination policy:    | <a href="#">#31c</a> | Plans, if any, for granting public Access to the full 20      |
| 52 | reproducible research    |                      | protocol, participant-level dataset, and statistical code     |
| 53 |                          |                      |                                                               |
| 54 |                          |                      |                                                               |
| 55 | <b>Appendices</b>        |                      |                                                               |
| 56 |                          |                      |                                                               |
| 57 | Informed consent         | <a href="#">#32</a>  | Model consent form and other related documentation Appendix   |
| 58 | materials                |                      | given to participants and authorised surrogates 2             |
| 59 |                          |                      |                                                               |
| 60 |                          |                      |                                                               |

1 Biological specimens [#33](#) Plans for collection, laboratory evaluation, and storage 15-17  
2 of biological specimens for genetic or molecular analysis  
3 in the current trial and for future use in ancillary studies,  
4 if applicable  
5  
6  
7  
8  
9

10 None The SPIRIT Explanation and Elaboration paper is distributed under the terms of the Creative  
11 Commons Attribution License CC-BY-NC. This checklist can be completed online using  
12 <https://www.goodreports.org/>, a tool made by the [EQUATOR Network](#) in collaboration with  
13 [Penelope.ai](#)  
14  
15  
16  
17  
18  
19  
20  
21  
22  
23  
24  
25  
26  
27  
28  
29  
30  
31  
32  
33  
34  
35  
36  
37  
38  
39  
40  
41  
42  
43  
44  
45  
46  
47  
48  
49  
50  
51  
52  
53  
54  
55  
56  
57  
58  
59  
60



## APPENDIX 2

### Charter and responsibilities of the Data Monitoring and Safety Committee

A Data Monitoring and Safety Committee (DMSC) has been established, and its lead by Clinical Study Center at Thomayer University Hospital, Prague. The DMSC is an independent organ from the study investigators. During the period of recruitment to the study, interim analyses will be supplied, in strict confidence, to the DMSC. In the light of these interim analyses, the DMSC will advise the study steering committee (SSC) if, in its view, the active intervention has been proven, beyond reasonable doubt, to be different from the placebo in some or all patients

Based on the reports of DMSC, the Study steering committee (SSC) can then decide whether or not to modify recruitment to the study and its oncoming course. Unless this happens, however, the SSC, will remain ignorant of the interim results.

The frequency of interim analyses will depend on the judgement of the Chair of the DMSC, in consultation with the SSC. However, we anticipate that there might be two to three interim analyses and one final analysis.

The Chair of DSMC is Mr. Jiri Skopek, M.D., Ph.D. who is available on request at [jiri.skopek1@ftn.cz](mailto:jiri.skopek1@ftn.cz)

#### Premature termination of the study

An interim analysis is performed when 50% of patients have already got to Visit 5 (where primary outcome is evaluated.) The interim analysis is performed by a member of the study's statistical unit who is blinded for the allocation of the active study mixture. The statistician will report to the DMSC. The DMSC will have unblinded Access to all data and discuss the interim-analysis results with the SSC. The SSC decides on continuation or termination of the study and will report to the central Ethics committee. The study will be ended if the frequency of severe adverse events crosses the 5% line. Severe adverse event is defined as that one requiring hospitalisation.

### Appendix 3: Informed consent for FMT donors

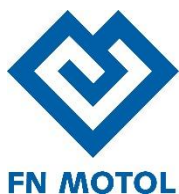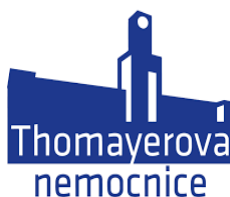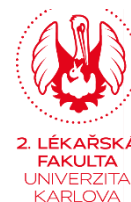

**Informovaný souhlas dospělé osoby s účastí na výzkumu změn střevního mikrobiomu u dospělých pacientů se syndromem dráždivého tračníku ve vědeckém projektu týmů Thomayerovy nemocnice a Fakultní nemocnice v Motole.**

Vážená paní/vážený pane,

syndrom dráždivého tračníku (irritable bowel syndrome, dále jen IBS) je nejčastější funkční onemocnění trávicího traktu, které pacienta výrazně omezuje v jeho každodenním životě. Může se projevovat různě, nejčastěji však jako delší dobu trvající bolest břicha s náhle vzniklým nutkáním na stolici. Léčba této nemoci je zdlouhavá, obtížná a ne vždy úspěšná. Dle recentních studií se však jako účinná léčebná metoda jeví transplantace střevní mikroflóry (faecal microbiota transplantation, dále jen FMT). A právě na její využití se zaměřuje náš projekt v podobě klinické intervenční studie.

Cílem projektu je zjistit, zda je transplantace stolice účinnou léčebnou metodu IBS a jak se po FMT mění složení střevní mikroflóry. K tomu abychom FMT mohli provést je potřeba mít vhodné dárce stolice. A právě zde byste nám mohli pomoci. Znalosti změn složení střevní mikroflóry po FMT bychom pak v budoucnu mohli využít buď k cílené ATB terapii negativně asociovaných bakterií nebo naopak k podávání probiotika prospěšných kmenů.

**Proto si Vás dovoluujeme pozvat k účasti na projektu vědeckých týmů Thomayerovy nemocnice a Fakultní nemocnice v Motole. Přečtěte si, prosím, toto poučení.** Pokud plně nerozumíte tomuto textu nebo pokud potřebujete doplňující informace, neváhejte se zeptat lékaře na emailu uvedeném níže. **Pokud souhlasíte s Vaší účastí ve studii, vyplňte prosím kontaktní údaje níže dokumentu a podepište prosím prohlášení, které se nachází v závěru tohoto informovaného souhlasu. Vaše účast je dobrovolná.** Tento souhlas můžete kdykoli zrušit, a to i bez udání důvodu.

Získání vzorku stolice by probíhalo ve vašem domácím prostředí. Stolice by bylo potřeba uchovat v běžném domácím mrazáku (teplota  $-20^{\circ}\text{C}$ ), k odběru byste byli vybaveni jednoduchými odběrovými sety s návodem a poučení o jejich používání. Po domluvě se členy vědeckého týmu (kontakt níže) by vzorky byly převezeny na naše pracoviště a hluboce zamrazeny ( $-80^{\circ}\text{C}$ ).

**Celý proces je dvoufázový.** Z prvního vzorku se provede molekulárně-genetická analýza a následně bioinformatické zpracování dat. Na základě výsledků bude vybráno asi 10-20 dárců, které kontaktujeme na základě informací uvedených níže. Splní-li kritéria vhodného dárce (pro vyžádání lze napsat na mail [jiri.vejmelka@ftn.cz](mailto:jiri.vejmelka@ftn.cz) nebo zavolat na tel.č. 731446619), budou poté znovu požádáni o darování stolice.

Po zpracování pro účely aktuální studie budou vzorky uchovány v hlubokomrazícím boxu v laboratořích Fakultní nemocnice v Motole. Jejich další využití proběhne pouze po přesné specifikaci formou dalšího souhlasu a Vaším podepsáním nového souhlasu.

V tomto projektu řádně dbáme o bezpečnost osobních údajů podle platných zákonů. Zejména je pak zcela zachována úplná anonymita pacienta při odesílání vzorků mimo naše pracoviště nebo při

### Appendix 3: Informed consent for FMT donors

zveřejňování vědeckých výsledků získaných z naší práce v odborných časopisech. Odebrané vzorky a z nich získané části jsou v našich laboratořích skladovány na dobu neurčitou, odděleně od osobních dat. Pokud byste v budoucnu svůj souhlas odvolali, Vaše jméno a ostatní osobní data budou bez prodlení vymazána z našich databází i papírových záznamů tak, aby se už nikdo nemohl dozvědět, komu vzorek patřil.

Bližší informace o nemoci jako takové můžete získat od členů vědeckého týmu:

**MUDr. Jiří Vejmelka** (Thomayerova nemocnice), tel: 731446619, email: [jiri.vejmelka@ftn.cz](mailto:jiri.vejmelka@ftn.cz)

**MUDr. Jakub Hurych** (Fakultní nemocnice v Motole), tel. 224432089, email: [jakub.hurych@lfmotol.cuni.cz](mailto:jakub.hurych@lfmotol.cuni.cz)

#### **Souhlas se zpracováním osobních údajů (dále jen „Souhlas“)**

udělený ve smyslu zákona č. 101/2000 Sb., o ochraně osobních údajů a o změně některých zákonů, ve znění pozdějších předpisů a s Nařízením Evropského parlamentu a Rady (EU) 2016/679

#### **Já, níže podepsaný**

*Jméno a příjmení:* .....

*Datum narození:* .....

*Rodné číslo:* .....

*Kontaktní email:* .....

*Telefonní číslo:* .....

#### **Souhlasím se zpracováním svých osobních údajů/ osobních údajů osoby jejíž jsem zákonným zástupcem Fakultní nemocnicí v Motole a Thomayerově nemocnici v rozsahu těchto údajů:**

*Jméno, příjmení, titul, datum a místo narození, rodné číslo, národnost, pohlaví, místo trvalého pobytu, telefon, email, výška, hmotnost*

Tento projev vůle je platný pouze v případě, že mé osobní údaje budou zpracovávány pouze v rozsahu nezbytném pro dosažení účelu zpracování uvedeného v tomto souhlasném prohlášení a v souladu s příslušnou legislativou v platném znění.

#### **Souhlas je poskytnut za účelem:**

*Zpracování vzorku stolice pro vědecko-výzkumnou činnost mající za cíl přispět k porozumění změn střevního mikrobiomu u dospělých pacientů se syndromem dráždivého tračníku*

#### **Souhlasím se zpracováním svých osobních údajů Fakultní nemocnicí v Motole a Thomayerově nemocnici po dobu:**

*Do odebrání mého souhlasu*

#### **Souhlasím se zpřístupněním svých osobních údajů Fakultní nemocnici v Motole a Thomayerově nemocnici:**

Fakultní nemocnice v Motole a Thomayerova nemocnice je oprávněna použít mé osobní údaje pouze v souladu s výše uvedeným účelem a po výše uvedenou dobu, nebo pro legitimní potřebu státních kontrolních

### Appendix 3: Informed consent for FMT donors

orgánů a orgánů činných v trestním řízení.

**Fakultní nemocnice v Motole a Thomayerova nemocnice** je dále oprávněna poskytnout mé osobní údaje pouze subjektům spolupracujícím s **Fakultní nemocnicí v Motole a Thomayerovou nemocnicí** na dosažení primárního účelu, pro který je udělen tento souhlas. S takovými subjekty se **Fakultní nemocnice v Motole a Thomayerova nemocnice** zavazuje uzavřít smlouvu obsahující stejné podmínky pro zpracování mých osobních údajů. Zpracování bude probíhat v souladu s příslušnými právními normami o ochraně osobních údajů a s Nařízením Evropského parlamentu a Rady (EU) 2016/679 ze dne 27. dubna 2016 o ochraně fyzických osob v souvislosti se zpracováním osobních údajů a o volném pohybu těchto údajů a o zrušení směrnice 95/46/ES (obecné nařízení o ochraně osobních údajů).

#### Byl/a jsem poučen/a o tom, že poskytnutí údajů je dobrovolné.

Dále jsem byl/a v souladu s příslušnou legislativou poučen/a:

- O svém právu tento souhlas odvolat, a to i bez udání důvodu,
- O svém právu přístupu k těmto údajům a právu na jejich opravu,
- O svém právu na vymazání těchto údajů, pokud dochází k jejich zpracování v rozporu s ochranou definovanou příslušnou legislativou nebo v rozporu s tímto souhlasem, nebo byl souhlas odvolán, svém právu podat stížnost u Úřadu pro ochranu osobních údajů.

Byl/a jsem také poučen/a o tom, že tato svá práva mohu uplatnit doručením žádosti na adresu: Fakultní nemocnice v Motole, Samostatné oddělení pověřence pro ochranu osobních údajů, V Úvalu 84, Praha 5.

Beru na vědomí, že odvolání tohoto souhlasu může ovlivnit dosažení účelu, pro který byl tento souhlas vydán, pokud tohoto účelu nelze dosáhnout jinak.

Prohlašuji, že jsem textu poučení porozuměl(a) a byl jsem lékařem srozumitelně informován(a) o povaze daného vyšetření a že jsem měl(a) možnost klást lékařovi doplňující dotazy.

Na základě tohoto poučení dále prohlašuji, že souhlasím se zařazením svých vzorků do studie probíhající v **Thomayerově nemocnici a Fakultní nemocnici v Motole**, jejímž cílem je porozumět změnám složení střevního mikrobiomu u dospělých pacientů se syndromem dráždivého tračníku.

V ..... dne .....

**Jméno a příjmení vyšetřované osoby** : .....

Podpis vyšetřované osoby .....

Prohlašuji, že jsem vysvětlil podstatu, účel a povahu odběrů pacientovi způsobem, který byl podle mého soudu srozumitelný.

**Jméno a příjmení lékaře**: .....

Podpis: .....

Datum: .....

**APPENDIX 4 – INFORMED CONSENT FORM FOR FMT RECIPIENTS (CZECH)****Informovaný souhlas pacienta - studie fekální mikrobiální terapie  
u pacientů se syndromem dráždivého tračníku**

Název studie: Fekální mikrobiální terapie u pacientů se syndromem dráždivého tračníku

Jméno pacienta:

Datum narození:

Pacient byl do studie zařazen pod číslem:

Odpovědný lékař:

1. Já, níže podepsaný (á) souhlasím s mou účastí ve studii. Je mi více než 18 let.
2. Byl (a) jsem podrobně informován (a) o cíli studie, o jejích postupech, a o tom, co se ode mě očekává. Lékař pověřený prováděním studie mi vysvětlil očekávané přínosy a případná zdravotní rizika, která by se mohla vyskytnout během mé účasti ve studii, a vysvětlil mi, jak bude postupovat při výskytu jejího nežádoucího průběhu. Beru na vědomí, že prováděná studie je výzkumnou činností. Beru na vědomí pravděpodobnost náhodného zařazení do jednotlivých skupin lišících se léčbou.
3. Informoval (a) jsem lékaře pověřeného studií o všech lécích, které jsem užíval (a) v posledních 3 měsících, i o těch, které v současnosti užívám. Bude-li mi nějaký lék předepsán jiným lékařem, budu ho informovat o své účasti v klinické studii a bez souhlasu lékaře pověřeného touto studií ho nevezmu.
4. Budu při své léčbě se svým lékařem spolupracovat a v případě výskytu jakéhokoliv neobvyklého nebo nečekaného příznaku ho budu ihned informovat.
5. Po celou dobu studie a další 4 týdny po jejím ukončení nebudu dárce krve.
6. Porozuměl (a) jsem tomu, že svou účast ve studii mohu kdykoliv přerušit či odstoupit, aniž by to jakkoliv ovlivnilo průběh mého dalšího léčení. Moje účast ve studii je dobrovolná.
7. Při zařazení do studie budou moje osobní data uchována s plnou ochranou důvěrnosti dle platných zákonů ČR. Do mé původní zdravotní dokumentace budou moci na základě mého uděleného souhlasu nahlédnout za účelem ověření získaných údajů zástupci nezávislých etických komisí a zahraničních nebo místních kompetentních úřadů. Pro tyto případy je zaručena ochrana důvěrnosti mých osobních dat. Při vlastním provádění studie mohou být osobní údaje poskytnuty jiným než výše uvedeným subjektům pouze bez identifikačních údajů, a to jako anonymní data pod číselným kódem. Rovněž pro výzkumné a vědecké účely mohou být moje osobní údaje poskytnuty pouze bez identifikačních údajů (anonymní data) nebo s mým výslovným souhlasem. Při předávání dat po 25. 5. 2018 bude zajištěna ochrana osobních údajů požadovaná „Nařízením Evropského parlamentu a Rady (EU) 2016/679 ze dne 27. dubna 2016 o ochraně fyzických osob v souvislosti se zpracováním osobních údajů“ známé pod označením GDPR.
8. S mou účastí ve studii není spojeno poskytnutí žádné odměny.
9. Porozuměl jsem tomu, že mé jméno se nebude nikdy vyskytovat v referátech o této studii. Já pak naopak nebudu proti použití výsledků z této studie.
10. Převzal/a jsem podepsaný stejnopis tohoto informovaného souhlasu.

Podpis pacienta:

Podpis lékaře pověřeného touto studií:

1  
2  
3  
4  
5  
6  
7  
8  
9  
10  
11  
12  
13  
14  
15  
16  
17  
18  
19  
20  
21  
22  
23  
24  
25  
26  
27  
28  
29  
30  
31  
32  
33  
34  
35  
36  
37  
38  
39  
40  
41  
42  
43  
44  
45  
46  
47  
48  
49  
50  
51  
52  
53  
54  
55  
56  
57  
58  
59  
60

Datum:

Datum:

For peer review only

# BMJ Open

## Protocol for faecal microbiota transplantation in irritable bowel syndrome – the MISCEAT study: a randomised, double-blind cross-over study utilising mixed microbiota from healthy donors

|                                 |                                                                                                                                                                                                                                                                                                                                                                                                                                                                                                                                                                                                                                                                                                                                                                                                                                                                                                                                     |
|---------------------------------|-------------------------------------------------------------------------------------------------------------------------------------------------------------------------------------------------------------------------------------------------------------------------------------------------------------------------------------------------------------------------------------------------------------------------------------------------------------------------------------------------------------------------------------------------------------------------------------------------------------------------------------------------------------------------------------------------------------------------------------------------------------------------------------------------------------------------------------------------------------------------------------------------------------------------------------|
| Journal:                        | <i>BMJ Open</i>                                                                                                                                                                                                                                                                                                                                                                                                                                                                                                                                                                                                                                                                                                                                                                                                                                                                                                                     |
| Manuscript ID                   | bmjopen-2021-056594.R2                                                                                                                                                                                                                                                                                                                                                                                                                                                                                                                                                                                                                                                                                                                                                                                                                                                                                                              |
| Article Type:                   | Protocol                                                                                                                                                                                                                                                                                                                                                                                                                                                                                                                                                                                                                                                                                                                                                                                                                                                                                                                            |
| Date Submitted by the Author:   | 11-Jun-2022                                                                                                                                                                                                                                                                                                                                                                                                                                                                                                                                                                                                                                                                                                                                                                                                                                                                                                                         |
| Complete List of Authors:       | Hurych, Jakub; Charles University Second Faculty of Medicine, Department of Medical Microbiology; Charles University Second Faculty of Medicine, Department of Paediatrics<br>Vejmelka, Jiri; Charles University Third Faculty of Medicine, Department of Internal Medicine<br>Vodolanova, Lucie; Charles University Second Faculty of Medicine, Department of Paediatrics<br>Kramna, Lenka; Charles University Second Faculty of Medicine, Department of Paediatrics<br>Larionov, Vladyslav; Charles University Second Faculty of Medicine, Department of Paediatrics<br>Kulich, Michal; Charles University, Department of Probability and Statistics<br>Cinek, Ondrej; Charles University Second Faculty of Medicine, Department of Pediatrics; Charles University Second Faculty of Medicine, Department of Medical Microbiology<br>Kohout, Pavel; Charles University Third Faculty of Medicine, Department of Internal Medicine |
| <b>Primary Subject Heading</b>: | Gastroenterology and hepatology                                                                                                                                                                                                                                                                                                                                                                                                                                                                                                                                                                                                                                                                                                                                                                                                                                                                                                     |
| Secondary Subject Heading:      | Evidence based practice, Genetics and genomics, Research methods                                                                                                                                                                                                                                                                                                                                                                                                                                                                                                                                                                                                                                                                                                                                                                                                                                                                    |
| Keywords:                       | Functional bowel disorders < GASTROENTEROLOGY, Adult gastroenterology < GASTROENTEROLOGY, MICROBIOLOGY                                                                                                                                                                                                                                                                                                                                                                                                                                                                                                                                                                                                                                                                                                                                                                                                                              |
|                                 |                                                                                                                                                                                                                                                                                                                                                                                                                                                                                                                                                                                                                                                                                                                                                                                                                                                                                                                                     |

SCHOLARONE™  
Manuscripts

1  
2  
3 1 **Protocol for faecal microbiota transplantation in irritable bowel syndrome – the MISCEAT**  
4  
5 2 **study: a randomised, double-blind cross-over study utilising mixed microbiota from**  
6  
7  
8 3 **healthy donors**  
9

10 4  
11  
12 5 Jakub Hurych<sup>1,2\*</sup>, Jiri Vejmelka<sup>3\*</sup>, Lucie Vodolanova<sup>2</sup>, Lenka Kramna<sup>2</sup>, Vladyslav Larionov<sup>2</sup>, Michal  
13  
14 6 Kulich<sup>4</sup>, Ondrej Cinek<sup>1,2†</sup>, Pavel Kohout<sup>3†</sup>  
15

16  
17 7 \*Shared first authorship, † shared last authorship  
18

19 8

20  
21 9 **Affiliations:**

22  
23  
24 10 <sup>1</sup> Department of Medical Microbiology, 2nd Faculty of Medicine Charles University, Prague, Czechia

25  
26 11 <sup>2</sup> Department of Paediatrics, 2nd Faculty of Medicine Charles University, Prague, Czechia

27  
28 12 <sup>3</sup> Department of Internal Medicine, 3rd Faculty of Medicine Charles University and Thomayer

29  
30 13 University Hospital, Prague, Czechia

31  
32 14 <sup>4</sup> Department of Probability and Statistics, Faculty of Mathematics and Physics, Charles University,

33  
34 15 Prague, Czechia  
35  
36  
37 16

38  
39 17 **Correspondance:** Jakub Hurych, M.D., Department of Paediatrics and Department of Medical

40  
41 18 Microbiology, 2nd Faculty of Medicine Charles University, Prague, Czechia; V Uvalu 84/5, 15006,

42  
43 19 Prague 5; [jakub.hurych@lfmotol.cuni.cz](mailto:jakub.hurych@lfmotol.cuni.cz)  
44  
45  
46 20

47  
48 21 **Word counts:** 3865  
49

50  
51 22 **Abbreviations:** IBS, Irritable Bowel Syndrome; IBS-D, diarrheal type of irritable bowel syndrome; IBS-

52  
53 23 M, mixed type of irritable bowel syndrome; IBS-C, constipated type of irritable bowel syndrome; IBS-

54  
55 24 SSS, Irritable Bowel Syndrome Severity Scale Score  
56  
57  
58  
59  
60



1  
2  
3 25 **Keywords:** irritable bowel syndrome, faecal microbiota transplantation, irritable bowel syndrome  
4  
5 26 severity scale score, gut microbiome  
6  
7  
8  
9  
10  
11  
12  
13  
14  
15  
16  
17  
18  
19  
20  
21  
22  
23  
24  
25  
26  
27  
28  
29  
30  
31  
32  
33  
34  
35  
36  
37  
38  
39  
40  
41  
42  
43  
44  
45  
46  
47  
48  
49  
50  
51  
52  
53  
54  
55  
56  
57  
58  
59  
60

For peer review only

1  
2  
3 **28 AUTHORS AND INSTITUTIONS**  
4

5 29 Jakub Hurych, M.D., Department of Paediatrics and Department of Medical Microbiology, 2nd  
6  
7 Faculty of Medicine, Charles University, University Hospital Motol, Prague, Czechia;  
8  
9  
10 31 [jakub.hurych@lfmotol.cuni.cz](mailto:jakub.hurych@lfmotol.cuni.cz)  
11

12 32  
13  
14 33 Jiří Vejmelka, M.D., Department of Internal Medicine, 3rd Faculty of Medicine Charles University and  
15  
16 Thomayer University Hospital, Prague, Czechia, [jiri.vejmelka@ftn.cz](mailto:jiri.vejmelka@ftn.cz)  
17  
18

19 35  
20  
21 36 Lucie Vodolánová, M.Sc., Department of Paediatrics and Department Medical Microbiology, 2nd  
22  
23 Faculty of Medicine ,Charles University, University Hospital Motol, Prague, Czechia;  
24  
25 38 [lucie.vodolanova@lfmotol.cuni.cz](mailto:lucie.vodolanova@lfmotol.cuni.cz)  
26  
27

28 39  
29  
30 40 Lenka Kramná, M.Sc., Ph.D., Department of Paediatrics and Department Medical Microbiology, 2nd  
31  
32 Faculty of Medicine ,Charles University, University Hospital Motol, Prague, Czechia;  
33  
34 42 [lenka.kramna@lfmotol.cuni.cz](mailto:lenka.kramna@lfmotol.cuni.cz)  
35  
36

37 43  
38  
39 44 Vladyslav Larionov, B.Sc., Department of Paediatrics and Department Medical Microbiology, 2nd  
40  
41 Faculty of Medicine ,Charles University, University Hospital Motol, Prague, Czechia;  
42  
43 46 [vladyslav.larionov@fnmotol.cz](mailto:vladyslav.larionov@fnmotol.cz)  
44  
45

46 47  
47  
48 48 Assoc. prof. Michal Kulich, M.Sc., Ph.D., Department of Probability and Statistics, Faculty of  
49  
50 Mathematics and Physics, Charles University, Prague, Czechia; [kulich@karlin.mff.cuni.cz](mailto:kulich@karlin.mff.cuni.cz)  
51  
52

53 50  
54  
55 51 Prof. Ondřej Cinek, M.D., Ph.D., Department of Paediatrics and Department of Medical Microbiology,  
56  
57 2nd Faculty of Medicine ,Charles University, University Hospital Motol, Prague, Czechia;  
58  
59 53 [ondrej.cinek@lfmotol.cuni.cz](mailto:ondrej.cinek@lfmotol.cuni.cz)  
60

1  
2  
3 54  
4  
5  
6 55 Assoc. prof. Pavel Kohout, M.D., Ph.D. Department of Internal Medicine, 3rd Faculty of Medicine  
7  
8 56 Charles University and Thomayer University Hospital, Prague, Czechia; pavel.kohout@ftn.cz  
9  
10  
11  
12  
13  
14  
15  
16  
17  
18  
19  
20  
21  
22  
23  
24  
25  
26  
27  
28  
29  
30  
31  
32  
33  
34  
35  
36  
37  
38  
39  
40  
41  
42  
43  
44  
45  
46  
47  
48  
49  
50  
51  
52  
53  
54  
55  
56  
57  
58  
59  
60

For peer review only

## 57 **ABSTRACT**

58 **Introduction.** Several studies have demonstrated dysbiosis in irritable bowel syndrome (IBS).

59 Therefore, faecal microbiota transplantation, whose effect and safety have been proven in

60 *Clostridioides difficile* infections, may hold promise in other conditions, including irritable bowel

61 syndrome. Our study will examine the effectiveness of stool transfer with artificially increased

62 microbial diversity in IBS treatment.

63 **Methods and analysis** A three-group, double-blind, randomized, cross-over, placebo-controlled

64 study of two pairs of gut microbiota transfer will be conducted in 99 patients with diarrhoeal or

65 mixed type of IBS. Patients aged 18-65 will be randomised into three equally sized groups: group A

66 will first receive two enemas of study microbiota mixture (deep-frozen stored stool microbiota mixed

67 from eight healthy donors); after eight weeks, they will receive two enemas with placebo (autoclaved

68 microbiota mixture), whereas group B will first receive placebo, then microbiota mixture. Finally,

69 group C will receive placebos only. The irritable bowel syndrome severity symptom score (IBS-SSS)

70 questionnaires will be collected at baseline and then at weeks 3,5,8,11,13,32. Faecal bacteriome will

71 be profiled before and regularly after interventions using 16S rDNA next-generation sequencing.

72 Food records, dietary questionnaires, anthropometry, bioimpedance, biochemistry and haematology

73 workup will be obtained at study visits during the follow-up period. The primary outcome is the

74 change in the IBS-SSS between the baseline and four weeks after the intervention for each patient

75 compared to placebo. Secondary outcomes are IBS-SSS at two weeks after the intervention and 32

76 weeks compared to placebo and **changes in the number of loose stools, Bristol stool scale,**

77 **abdominal pain and bloating, anthropometric parameters, psychological evaluation and the gut**

78 **microbiome composition.**

79 **Ethics and dissemination.** The study was approved by the Ethics Committee of Thomayer University

80 Hospital, Czechia (G-18-26); study results will be published in peer-reviewed journals and presented

81 at international conferences and patient group meetings.

1  
2  
3 82 **Study registration number. NCT04899869**  
4  
5

6 83  
7  
8

9 84 **STRENGTHS AND LIMITATIONS OF THIS STUDY**  
10

11 85 ➤ Usage of mixed microbiota from multiple donors inflates the diversity of transferred microbiota  
12  
13 by enriching it for numerous rare species.  
14 86

15  
16 87 ➤ All interventions will be carried out using the same active mixed microbiota or the same placebo.  
17

18 88 ➤ Each intervention consists of two consecutive transfers, which increases the probability that the  
19  
20 transferred microbiota engrafts.  
21 89

22  
23 90 ➤ Microbiome profiling, food records, anthropometry and bioimpedance data allow detailed  
24  
25 monitoring of transfer effectiveness.  
26 91

27 92 ➤ Mucosa-associated microbiota will not be assessed because the stool transfer will be performed  
28  
29 by enema, not colonoscopy that would allow biopsies.  
30 93  
31  
32  
33  
34  
35  
36  
37  
38  
39  
40  
41  
42  
43  
44  
45  
46  
47  
48  
49  
50  
51  
52  
53  
54  
55  
56  
57  
58  
59  
60

## 94 INTRODUCTION

95 Irritable bowel syndrome (IBS) is characterised as recurrent abdominal pain on average at least one  
96 day/week in the last three months, associated with two or more of the following criteria: 1) related  
97 to defecation; 2) associated with a change in the frequency of stool; 3) associated with a change in  
98 the form (appearance) of stool [1]. It is common among the adult European population (approx. 10%  
99 [2]), but its aetiology is still unknown. It may, among other causes, include micro-inflammation,  
100 disturbance of the brain-gut axis, inadequate secretion of bile acids, increased permeability of the  
101 gut epithelial barrier, or gut dysbiosis. Dysbiosis in IBS has been suggested by several studies  
102 (reviewed, e.g. in Rajilic-Stojanovic et al. [3]). There are indications that Firmicutes may be disturbed,  
103 with *Dorea*, *Blautia* and *Roseburia* increased, whereas *Veillonella* and *Faecalibacterium* decreased.  
104 Among Actinobacteria, a decrease in *Bifidobacterium* was noted, and among Proteobacteria,  
105 *Enterobacteriaceae* were increased. Conflicting and heterogeneous results were reported for  
106 Bacteroidetes. The major limitation of available studies is their cross-sectional character, which may  
107 not be enough in a disease where diarrhoeal episodes alternate with normal stool composition or  
108 constipation.

109  
110 The faecal microbiota transplantation (FMT) has gained popularity by its remarkable effect in  
111 recurrent *Clostridioides difficile* infections, where it has now become a recognised life-saving therapy  
112 [4]. The first published randomized, double-blinded study on FMT in IBS, published in 2018 when  
113 starting our study [5], used stool intervention from an allogeneic donor or autologous stool. The  
114 intervention was centred on a well-defined group of IBS of predominantly diarrhoeal form. The stool  
115 was transferred by colonoscopy to the cecum. The primary outcome was an improvement in the  
116 *Irritable Bowel Syndrome - Severity Symptom Score* (IBS-SSS). The treatment was associated with a  
117 significant effect at three months but not at 12 months post-intervention [5]. This study used single  
118 donors and did not assess stool microbiota. Thus, the transferred microbiota likely varied between  
119 transfers both in their composition and in their diversity. Since then, more studies focused on FMT in

1  
2  
3 120 IBS have been carried out [6, 7, 8, 9, 10, 11]. They differed in design, but none of them used a mixed  
4  
5 121 microbiota from multiple donors as the active substance. Furthermore, a recent meta-analysis of  
6  
7 122 randomized control trials on FMT in IBS (including the above-mentioned articles) pointed out  
8  
9 123 insufficient evidence quality to support recommending FMT in the treatment of IBS. [12]  
10  
11

12 124

13  
14 125 Our study protocol aims to test whether faecal microbiota transplantation of mixed microbiota from  
15  
16 126 several selected donors can alleviate symptoms of IBS measured by IBS-SSS four weeks after the  
17  
18 127 intervention, as compared to autoclaved placebo. The secondary study aims to test the acute (after  
19  
20 128 two weeks) and the long-term effect (after six months) on symptoms relief. **We also focus on the**  
21  
22 129 **number of loose stools, Bristol stool scale, abdominal pain and bloating, BMI, fat content, waist**  
23  
24 130 **circumference, skinfold thickness, psychological evaluation and the gut microbiome composition.**  
25  
26

27 131

28  
29  
30 132 We hypothesise that the transfer of active microbiota of high diversity can lead to changes in the  
31  
32 133 patient's gut microbiome composition and/or function to alleviate IBS symptoms.  
33  
34  
35  
36  
37  
38  
39  
40  
41  
42  
43  
44  
45  
46  
47  
48  
49  
50  
51  
52  
53  
54  
55  
56  
57  
58  
59  
60

## 134 **METHODS AND ANALYSIS**

### 135 **Study design**

136 This is a three-group, double-blind, placebo-controlled, randomized, cross-over study in adult  
137 patients diagnosed with IBS (diarrhoeal or mixed form) according to Rome IV criteria. Each study  
138 subject will undergo two pairs of FMT (a total of four enemas for each patient), with the pairs of  
139 transfers being eight weeks apart. The active intervention substance is a mixed stool microbiota  
140 derived from healthy individuals who were preselected for high alpha diversity of their microbiome  
141 and distance in community ordination from IBS patient's microbiota. Placebo is the same mixture,  
142 inactivated by autoclaving.

143  
144 The study subjects are randomly assigned to one of three groups: A) enema with active substance  
145 first and with placebo second or B) enema with placebo first and active substance second or C)  
146 enemas of placebo only (detailed scheme in **Figure 1**). Eligible participants will be followed-up for 32  
147 weeks after the first intervention to monitor symptom severity scoring of IBS (IBS-SSS), with regular  
148 profiling of their gut microbiome and **other parameters like the number of loose stools, Bristol stool**  
149 **scale, abdominal pain and bloating, BMI, fat content, waist circumference, skinfold thickness, and**  
150 **psychological evaluation.**

151 The placebo group is planned because of the unknown onset and duration of the intervention effect:  
152 if the beginning of an effect is delayed, or if it persists for a long time, simple cross-over design would  
153 not have sufficient power due to the carry-over effect. In case the FMT was associated with  
154 significant but not durable amelioration of the status, the control group would still increase the  
155 statistical power.

156

157 This study protocol is reported as per the SPIRIT guidelines [13] (for the SPIRIT checklist see **Appendix**  
158 **1**).

159



## 160 **Study setting**

161 The participants are recruited at a single center, the Department of Internal Medicine, Thomayer  
162 University Hospital in Prague, Czech Republic. This hospital has approximately 1,000 beds, including  
163 80 in ICU's, serves approximately 50,000 patients per year. The center is experienced in treating  
164 patients with IBS and other functional gastrointestinal disorders, with about 200 such patients  
165 registered and further subjects coming for consultations from other workplaces to this tertiary  
166 referral centre.

167

## 168 **Recruitment and eligibility criteria**

169 Stool donors

170 Stool donor candidates were recruited among blood donors at Thomayer University Hospital and  
171 medical students in their first year of study (i.e. preclinical) from the 2nd Faculty of Medicine, Charles  
172 University, Prague. We obtained stool samples from 58 such candidates fulfilling the inclusion criteria  
173 (**Table 1**). Based on their high bacterial alpha-diversity and by the position on the ordination plot of  
174 the weighted Unifrac distance against 46 patients with IBS-D (**Figure 2**), 14 candidates proceeded to  
175 the safety screening, whereby eight passed it (for reasons of candidate's exclusion, see **Figure 3**).

176

177 After 14 potential donors were selected based on the microbiota composition, they were screened  
178 for infectious diseases and clinically examined as indicated by the *European consensus conference on  
179 faecal microbiota transplantation in clinical practice guidelines* [14] (**Table 2**). All subjects were also  
180 repeatedly tested for SARS-CoV-2 from both nasopharyngeal swab and stool. Six candidates were  
181 excluded (for reasons, see **Figure 3**), whereas eight became regular stool donors. These eight donors  
182 were regularly investigated as follows:

- 183 - at every donation: by questionnaire for gastrointestinal symptoms, antibiotic usage, unprotected  
184 sex, travelling to exotic countries; clinical signs of COVID-19; the presence of SARS-CoV-2 in the  
185 donated stool;

- 1  
2  
3 186 - every 4 weeks: for SARS-CoV-2 from nasopharyngeal swab;  
4  
5 187 - every 8-12 weeks: for all other stool tests mentioned in **Table 2**.  
6  
7  
8 188

9  
10 189 Prospective study participants

11  
12 190 Patients diagnosed with IBS-D (diarrheal type) or IBS-M (mixed diarrhoeal and constipation type) who  
13  
14 191 fulfil the inclusion and exclusion criteria listed in **Table 3** are recruited via regular' patient's check-ups  
15  
16 192 at the Gastroenterological unit at Thomayer University Hospital, by referrals from their general  
17  
18 193 practitioners, following our newspaper articles or word of mouth.  
19  
20

21 194

### 22 23 195 **Study microbiota mixture for intervention**

24  
25 196 The intervention microbiota is a mixture of regular stool donations from the eight regular donors.

26  
27 197 The collection of stools for this purpose is already completed. The donors were advised to regularly  
28  
29 198 defecate at their home toilet into a clean plastic bag placed in Fecotainer (Excretas Medical, NL) with  
30  
31 199 an Anaerogen bag (Thermo Scientific, USA). This bag generated an anaerobic atmosphere during  
32  
33 200 transport to ensure anaerobes survival. The stool was transported to the laboratory with the  
34  
35 201 maximum allowable time until processing being 6 hours; the actual time was approximately 1.5  
36  
37 202 hours. The stool was weighed upon arrival, inspected for blood admixture, and immediately  
38  
39 203 processed by blending with a solution consisting of sterile 0.9% saline (160 ml per 100 g of stool),  
40  
41 204 sterile phosphate buffer saline at pH 7.4 (20 ml per 100 g of stool) and sterile 99.5% glycerol (20 ml  
42  
43 205 per 100 g stool, which is approximately 10% of solution's volume; therefore, it is unlikely to have  
44  
45 206 laxative properties upon administration). From our experience, ~ 105 ml of the study mixture  
46  
47 207 represents ~40 g of stool. The mixture was then filtered through a sterile stainless steel mesh of 0.8  
48  
49 208 mm pore size into a sterile plastic bottle, which was then immediately frozen at -80°C. Whenever  
50  
51 209 possible (blending or post-filtration), the procedure was performed under a nitrogen atmosphere to  
52  
53 210 protect obligate anaerobes. All stool portions were mixed together in a large stainless steel bucket  
54  
55 211 using an electric mortar mixer under anaerobic conditions and at low temperature (on ice).  
56  
57  
58  
59  
60

1  
2  
3 212  
4  
5 213 Based on the recommendation from the Nanjing consensus [15], the bacterial cell content of the  
6  
7 214 study microbiota mixture was quantified. We performed a real-time PCR of the 16S rRNA gene with a  
8  
9 215 standard curve derived from bacterial culture and controls from previously used stool transplants  
10  
11 216 from another centre. It was estimated that the cell count in the transfer ranged between  $2 \times 10^{12}$  and  
12  
13 217  $1 \times 10^{13}$  (depending on the expected composition of the microbiota as to the 16S gene count per an  
14  
15 218 average bacterial cell). Unfortunately, the Nanjing consensus [15] provides neither reference to the  
16  
17 219 cell counting method (Table 2 therein) nor to control materials. Therefore more exact direct  
18  
19 220 comparison of the requested quantities is not possible.  
20  
21 221

22  
23 222 The mixed microbiota substance was divided into aliquots of 13-14 g (which is  $\sim 35$  ml). Two-thirds of  
24  
25 223 the tubes served as a placebo: they were immediately autoclaved at  $121^\circ\text{C}$  for 30 minutes with slow  
26  
27 224 cooling. Pre-sterilised tubes were used to ensure that autoclaved placebos would not be visually  
28  
29 225 distinguishable from tubes with the active substance. Assignment of tubes to the autoclave,  
30  
31 226 numbering, sealing, and labelling were done under the guidance of a statistical unit member (see  
32  
33 227 below).  
34  
35 228

36  
37 229 All aliquot tubes are kept frozen at  $-80^\circ\text{C}$  in the same type of plastic tubes, labelled by codes. Three  
38  
39 230 such aliquots represent one dose for FMT ( $\sim 40$  g of stool, in  $\sim 105$  ml). Aliquoting into multiple 50 ml  
40  
41 231 tubes instead of one larger volume was decided because of the availability of durable plastic, which  
42  
43 232 must be both autoclavable and deep frost resistant.  
44  
45 233

46  
47 234 Before administering, the study microbiota mixture will be thawed in a warm ( $37^\circ\text{C}$ ) water bath, with  
48  
49 235 intermittent mixing by inverting the tubes.  
50  
51 236

52  
53 237

### 54 55 56 57 58 59 237 **Randomization, allocation and blinding**

1  
2  
3 238 At Visit 1, each patient is randomised into one of three equally sized groups (Figure 1) as described in  
4  
5 239 the *Study design*. Randomisation assignments is generated in advance in blocks of nine and stored in  
6  
7 240 a protected database. For each patient, anonymous codes for tubes containing either active study  
8  
9 241 microbiota mixture or placebo is received. Thus, the true assignment will remain concealed for the  
10  
11 242 patients and the study staff until the end of the study observation period. The Investigator is  
12  
13 243 encouraged to maintain the blind as far as possible. The actual allocation must not be disclosed to  
14  
15 244 the patient and/or other study personnel including other site personnel, monitors, corporate  
16  
17 245 sponsors or project office staff; nor should there be any written or verbal disclosure of the code in  
18  
19 246 any of the corresponding patient documents.  
20  
21  
22

23 247

### 248 **Study Intervention**

249 Study substance is administered during Visit 2+3 and then again 7+8 as a retention colon enema and  
250 will be held optimally for at least 30 minutes. Bowel preparation is applied the day before the  
251 intervention (prior to Visit 2 and Visit 7) (natrii picosulfas 10 milligrams, magnesii oxidum leve 3,5  
252 grams, acidum citricum 12 grams). No preparation is performed before the second enema in the pair  
253 (visits 3 and 8).  
254

255 A rectal tube is inserted into the rectum, and the enema is applied. Application kit (Irrigator PN  
256 0462/E/93, Erilens, Czechia) is used. After the enema is applied, the patient position is changed to  
257 enable the study substance to be spread within the colon. The exact time of the enema completion is  
258 recorded as well as the enema retention time.  
259

260

### 260 **Outcomes**

261 Primary outcome

262 The primary outcome is the change in the IBS severity symptom score (IBS-SSS) in the active  
263 microbiota group relative to the placebo group. The change will be evaluated as the difference

1  
2  
3 264 between the score at four weeks after the intervention (study weeks 5 or 13, respectively, see **Figure**  
4  
5 265 **1**) and the baseline score (week -1 in group A or week 8 in group B).

6  
7  
8 266

9  
10 267 Secondary outcomes

11  
12  
13 268 - The acute change in the IBS severity symptom score (IBS-SSS) between baseline and two weeks  
14  
15 269 after intervention (study weeks 3 and 11, respectively, see **Figure 1**).

16  
17 270 - The long-term change in the IBS severity symptom score (IBS-SSS) between baseline (week -1)  
18  
19 271 and week 32 (see **Figure 1**). The long term change will compare group C (placebo only) to  
20  
21 272 merged groups A+B (active study microbiota mixture).

22  
23  
24 273 - **Following outcomes compare changes in the active microbiota group relative to the placebo**  
25  
26 274 **group between baseline and study week 32:**

27  
28 275 • **Quantity of loose stools per day**

29  
30 276 • **Stool consistency evaluated by the Bristol stool scale**

31  
32 277 • **Abdominal pain measured by the Visual Analogue Scale (VAS)**

33  
34 278 • **Frequency of bloating per week**

35  
36 279 • **Body Mass Index in kg/m<sup>2</sup>**

37  
38 280 • **Body fat mass estimated by measuring combined skinfold thickness in millimetres at given**  
39  
40 281 **locations (biceps, triceps, subscapular, suprailiac)**

41  
42 282 • **Percentage of body fat mass measured by bioelectrical impedance analysis**

43  
44 283 • **Waist circumference in centimetres**

45  
46 284 • **The psychological and well-being effects of the therapy scored by IBS-QoL questionnaires**

47  
48 285 • **The faecal microbiome's alpha diversity measured by the Chao index**

49  
50 286 • **The faecal microbiome's beta diversity assessed by the quantitative Bray-Curtis index**  
51  
52 287 **ordinated by non-metric multidimensional scaling (NMDS)**  
53  
54  
55  
56  
57  
58  
59  
60

- 1  
2  
3 288       • **Quantity of *Blastocystis* sp. assessed by a specific quantitative PCR assay measured in**  
4  
5 289           **genomic equivalents per microlitre DNA**  
6  
7 290

9  
10 291 **Data collection and follow-up**

11  
12 292 Timing of assessments

13  
14 293 At visit 1 (the randomization), the patient is given detailed instructions and thoroughly instructed by  
15  
16 294 the study team. The patients are asked to keep the identical type of diet throughout the observation.  
17  
18 295 They are asked to regularly (once a week) fill the study questionnaire. A study team member sends  
19  
20 296 that via the Survey Monkey smartphone application, an online survey development cloud-based  
21  
22 297 software. Relevant data are entered in a structured manner (frequency of defecation, Bristol stool  
23  
24 298 scale, pain measures, other symptoms, dietary records etc.). This member also frequently  
25  
26 299 communicate with study participants and answer any questions regarding the study to keep the  
27  
28 300 patient's adherence. An overview of the examinations at each visit and the timing of the study visits  
29  
30 301 could be seen in **Table 4**.

31  
32  
33  
34 302

35  
36 303 Irritable bowel syndrome severity scale score (IBS-SSS).

37  
38 304 The IBS-SSS is a five-question survey that reflects 1) the severity of abdominal pain, 2) frequency of  
39  
40 305 abdominal pain, 3) severity of abdominal distention, 4) satisfaction with bowel habits, and 5)  
41  
42 306 interference with quality of life over the past ten days. Subjects respond to each question on a 100-  
43  
44 307 point analogue scale ; thus, the score can range from 0 to 500, with higher scores indicating more  
45  
46 308 severe symptoms.[16]

47  
48  
49  
50 309

51  
52 310 At eligibility screening, the patients is given instructions on how to fill the IBS-SSS questionnaires (via  
53  
54 311 the Survey Monkey application). The questionnaires are filled in at eligibility screening and then at  
55  
56 312 week -1, 3, 5 (before the first intervention, at the presumed peak of its effect, and after further 2  
57  
58 313 weeks), then at weeks 8, 11, 13 (similarly with the second intervention), and finally at week 32.  
59  
60

1  
2  
3 314  
4

5 315 Weight, height, bioimpedance

6  
7 316 Body weight, height and bioimpedance is examined during Visit 0, 1, 4, 5, 9 and 11. Medical Body

8  
9  
10 317 Composition Analyzer Seca mBCA 515, (Seca, Germany) is used to measure changes in body

11  
12 318 composition (8-point bioelectric impedance analysis at a frequency of 5 - 50 kHz with a current of

13  
14 319 100  $\mu$ A), scanning performed with three pairs of hand electrodes and two pairs of leg electrodes,

15  
16 320 measurements performed with light clothing and without metal objects (jewellery, keys). The weight

17  
18 321 is determined in patients wearing underwear using the Seca mBCA 515. The height is determined by

19  
20 322 a standardised technique with a metal stadiometer with an accuracy of 1 mm. Seca analytics 115

21  
22 323 software is used to analyse the obtained data (Seca, Hamburg, Germany ). The measurements is

23  
24 324 performed according to the NIHR Southampton Biomedical Research Centre standard protocol (Seca

25  
26 325 mBCA, NIHR Southampton Biomedical Research Centre, 2014).

27  
28  
29  
30 326

31  
32 327 Detailed anthropometry

33  
34 328 It is performed by nutritional therapists in Visit 1, 5, 10 and 11. It involves weight, abdominal (waist)

35  
36 329 circumference, buttocks (hip) circumference, thigh circumference, and skinfolds (thigh, triceps,

37  
38 330 subscapular, suprailiacal).

39  
40  
41 331

42  
43 332 Serum workup, archiving serum+plasma

44  
45 333 Blood is sampled at Visits 0, 4, 9, 11 and will include: A) serum+plasma archiving, B) serum workup.

46  
47 334 Laboratory panel testing will comprise sodium, potassium, chloride, urea, creatinine, glucose,

48  
49 335 calcium, phosphate, total protein and albumin, AST, ALT, ALP, **GGT**, bilirubin, lipid panel, HS-CRP,

50  
51 336 blood cell count with differential count, INR, urine analysis (sediment and biochemistry). One plasma

52  
53 337 and one serum aliquots are made at these visits and frozen for forensic reasons.

54  
55  
56 338

57  
58  
59 339 Psychological evaluation

60

1  
2  
3 340 It is performed during Visit 0 and Visit 11 using a structured questionnaire evaluated by a qualified  
4  
5 341 psychologist.

6  
7 342  
8  
9 343 Dietary questionnaire & advice, evaluation of food records

10  
11 344 It is performed by nutritional therapists at Visit 4 and 9 and includes: evaluation of food records will  
12  
13 345 include: overall daily energy intake, proteins, carbohydrates and lipids calculations and dietary fibre.

14  
15 346  
16  
17  
18 347 Gut microbiome composition

19  
20 348 Faecal samples are collected at home by the subjects in the same way as described for donors above  
21  
22 349 and at time points indicated in the sections above. If not immediately brought to the visit, the stool is  
23  
24 350 frozen in a home freezer and then transported in a frozen tube container. DNA extraction is  
25  
26 351 performed using the PowerSoil kit (Qiagen), and the bacteriome is characterised by 16S rDNA  
27  
28 352 amplicon profiling using the tagged primers according to Schloss protocol [17] and sequencing on a  
29  
30 353 MiSeq instrument with the 2x250 bases sequencing kit (both Illumina, USA).

31  
32 354  
33  
34  
35  
36 355 The first steps of bioinformatic analysis will be performed in the DADA2 package[18]. Statistical  
37  
38 356 analyses and visualisation will be then performed in R with its Phyloseq package. The functional  
39  
40 357 potential of the bacteriome will be assessed using the PICRUST software, which predicts functional  
41  
42 358 capabilities based on the 16S rDNA profiles.

43  
44 359  
45  
46  
47 360 The virome is assessed in a total of four stool samples per patient at Visit 0, 4, 9 and 11. The aim of  
48  
49 361 this analysis is to assess the repertoire of major bacteriophages. The virome analysis is based on  
50  
51 362 metagenomic sequencing of total DNA from a virus-enriched stool sample, according to the  
52  
53 363 previously published protocol [[19]].

54  
55 364  
56  
57  
58  
59  
60



1  
2  
3 365 Finally, a simple PCR-based semi-quantitative parasite screening aims to identify several mostly  
4  
5 366 benign unicellular parasites (e.g. *Blastocystis*, *Dientamoeba*, *Entamoeba*, *Endolimax*).  
6  
7  
8 367

### 368 **Safety monitoring**

11 369 All data are regularly monitored by the research team for any adverse events, and all potential  
12  
13 370 adverse events are recorded. Contacts to study coordinators active 24/7 are provided in case adverse  
14  
15 371 effects occur. If any concerns are identified during the screening or clinical assessment of donors or  
16  
17 372 recipients, further clinical evaluation and/or examination is immediately realised. All the concerns  
18  
19 373 during the study are assessed, and the recipient will be withdrawn if this is thought to be in his best  
20  
21 374 interest. A Data Monitoring and Safety Committee (DMSC) has been established and based on the  
22  
23 375 data from the planned interim analysis, has the right to terminate the study if the frequency of  
24  
25 376 severe adverse events crosses the 5% line (for a closer description of DMSC, its responsibilities and  
26  
27 377 premature termination of the study see **Appendix 2**).  
28  
29  
30  
31

32 378

### 379 **Sample size and power calculation**

36  
37 380 The study is powered to detect an absolute improvement of 62.5 points in IBS-SSS score over 8  
38  
39 381 weeks (which is 25% of the expected mean baseline score 250) between the active microbiota  
40  
41 382 intervention compared to placebo. With a sample size of 33 per group (**99 total**), the probability of  
42  
43 383 detecting such an improvement is at least 0.9. This calculation assumes 20% dropout rates, variance  
44  
45 384 in IBS-SSS scores 100 (see the results in [20]), a correlation between the final and baseline IBS-SSS  
46  
47 385 scores 0 (with a positive correlation, the power is higher), and no carry-over or temporal effect.  
48  
49  
50  
51

52 386

### 387 **Data management**

53  
54 388 Data from IBS-SSS, frequency of urgent defecations, Bristol stool scale, abdominal pain and bloating  
55  
56 389 are collected and stored via the application Survey Monkey. All anthropometric data are entered and  
57  
58 390 stored in password-protected platforms integrated within the hospital information system. Only the  
59  
60

1  
2  
3 391 researchers involved in the study have access to the final study dataset (IBS-SSS, frequency of urgent  
4  
5 392 defecations, Bristol stool scale, abdominal pain and bloating), which will be shared in an anonymised  
6  
7 393 form via the Zenodo repository. The only data in this manuscript are bacteriome data; their  
8  
9  
10 394 anonymised form will be available on reasonable request.  
11

12 395

### 14 396 **Statistical analyses**

16 397 The primary outcome analysis will be based on the difference in IBS-SSS scores over the second  
17  
18 398 treatment period (week 14 vs week 8) minus the change over the first treatment period (week 5 vs  
19  
20 399 week -1). This difference will be used as a response in a linear model, with intercept corresponding to  
21  
22  
23 400 the temporal effect (seen in the placebo group C), an indicator of group A corresponding to the cross-  
24  
25 401 over effect (resulting from administration of placebo after active microbiota) and differences in  
26  
27 402 indicators for groups A and B modelling the effect of active microbiota. A robust sandwich estimator  
28  
29 403 of the variance matrix will be used to adjust for potentially unequal variances between the groups.  
30  
31  
32 404 Analyses of secondary outcomes will proceed by a similar methodology, comparing absolute or  
33  
34 405 relative differences of the post-intervention measure of each outcome relative to its baseline value.  
35  
36 406 The CONSORT 2010 guidelines will be followed in reporting the main trial results.  
37  
38  
39

40 407

### 42 408 **Study status**

44  
45 409 The study was registered at clinicaltrials.gov (NCT04899869) on May 25th 2021. The first patient was  
46  
47 410 recruited on June 17th 2021, and the first intervention was applied on July 29th 2021. As of August  
48  
49 411 17th 2021, 12 patients have signed the informed consent, and six interventions have been applied. It  
50  
51 412 is expected that the study will be completed in December **2023**.  
52

53 413

### 56 414 **Patient and public involvement**

1  
2  
3 415 Information on the study has been spread at conferences, in newspapers and by local  
4  
5 416 gastroenterologists contacted by researchers. Everyone interested got information material, which  
6  
7 417 allowed the potential subjects to read about the study and reach the researchers if they wanted to  
8  
9 418 participate. Participants were not involved in the development, recruitment of other participants or  
10  
11 419 conduct of the study. All recipients are asked about any possible adverse effects of treatment at  
12  
13 420 regular visits planned according to **Figure 1**; a thorough investigation will be conducted if any occur.  
14  
15 421 After completing the data analysis, all recipients will receive information about their results and be  
16  
17 422 offered a roll-over (receiving an active study microbiota mixture).  
18  
19  
20  
21 423

## 22 23 424 **ETHICS AND DISSEMINATION**

24  
25 425 Ethics approval for this study was granted in June 2018 by the Ethics Committee of the Institute for  
26  
27 426 Clinical and Experimental Medicine and Thomayer Hospital (Václavská 800, 140 59 Prague 4, Czech  
28  
29 427 Republic). Involvement in this study is completely voluntary; donors and recipients are required to  
30  
31 428 provide written informed consent prior to participation in the study (see **Appendix 3 and 4**).  
32  
33 429 Recipients and their caregivers are informed of unexpected findings or unrecognised conditions and  
34  
35 430 by possible future usage of their specimens in ancillary studies by trained physician or nurse; further  
36  
37 431 medical care will be arranged. Study donors received financial compensation to pay for the required  
38  
39 432 travelling costs when donating the stool. The patient will be offered a roll-over into an observational  
40  
41 433 study with the administration of active microbiota. The patients are informed of this option at the  
42  
43 434 start of the study and regularly reminded.  
44  
45  
46  
47  
48 435 We aim to publish findings in impact peer-reviewed international journals. Gastroenterologists,  
49  
50 436 internists and other care providers will be informed through the national conference meetings,  
51  
52 437 journals and patient groups meetings.  
53  
54  
55

56 438  
57  
58  
59  
60

1  
2  
3 439 **Protocol amendment number:** 01. Modification of the study protocol will be communicated to the  
4  
5 440 Ethics committee.

6  
7  
8 441 **Registration details** This study is registered with ClinicalTrials.gov (NCT04899869).

9  
10  
11 442 **Acknowledgement** We thank Peter Holger Johnsen, Linn Skjevling and Hege Hansen from University  
12  
13 443 Hospital of North Norway Harstad, Norway and Rasmus Goll from University Hospital of North  
14  
15 444 Norway Tromsø, Norway, for valuable advice regarding the study design and study microbiota  
16  
17 445 mixture preparation. We also thank Marcela Krutova, Jan Tkadlec, Daniela Lzicarova, Kamila  
18  
19 446 Dundrova, Marie Brajerova, Milena Antuskova, Barbora Dravotova, Jana Prasilova, Jana Sumova and  
20  
21 447 Ales Briksi all from Department of Medical microbiology, 2<sup>nd</sup> Faculty of Medicine, Charles University  
22  
23 448 and Motol University Hospital, Prague for their laboratory work in the regular microbiological  
24  
25 449 screening of the study donors.

26  
27  
28  
29  
30 450 **Contributors** OC, PK, JH, JV, MK contributed to the conception and design of the study. OC, PK, JH  
31  
32 451 and JV drafted the protocol with input from all other authors. JV and PK contributed to the patients  
33  
34 452 recruitment. JH, LV, LK and OC contributed to the microbiome analysis for donor selection. JH, OC  
35  
36 453 and JV contributed to the donor screening. LV, JH and OC contributed to the study microbiota  
37  
38 454 mixture preparation. MK contributed to the power size calculations and statistical analysis. VL  
39  
40 455 contributed to the randomization. JH and JV contributed equally to this paper, OC and PK contributed  
41  
42 456 equally either.

43  
44  
45  
46 457 **Funding** This research received funding from the Ministry of Health of the Czech Republic, grant Nr.  
47  
48 458 19-01-00127 . Funding received from this grant support direct research cost. All rights reserved

49  
50  
51 459 **Competing interests** None declared. No money from commercial sponsors was used.

52  
53  
54  
55 460 **Patient consent for publication** Not required.

1  
2  
3 461 **Ethics approval** Ethics approval for this study was granted in June 2018 by the Ethics Committee of  
4  
5 462 the Institut for Clinical and Experimental Medicine and Thomayer Hospital (Videňská 800, 140 59  
6  
7 463 Prague 4, Czech Republic).

9  
10 464 **Provenance and peer review** Not commissioned; externally peer-reviewed.

11  
12  
13 465 **Open Access** This is an open-access article distributed in accordance with the Creative Commons  
14  
15 466 Attribution Non-Commercial (CC BY-NC 4.0) license, which permits others to distribute, remix, adapt,  
16  
17 467 build upon this work non-commercially, and license their derivative works on different terms,  
18  
19 468 provided the original work is properly cited, appropriate credit is given, any changes made indicated,  
20  
21 469 and the use is non-commercial. See: <http://creativecommons.org/licenses/by-nc/4.0/>.

1  
2  
3  
4  
5  
6  
7  
8  
9  
10  
11  
12  
13  
14  
15  
16  
17  
18  
19  
20  
21  
22  
23  
24  
25  
26  
27  
28  
29  
30  
31  
32  
33  
34  
35  
36  
37  
38  
39  
40  
41  
42  
43  
44  
45  
46  
47  
48  
49  
50  
51  
52  
53  
54  
55  
56  
57  
58  
59  
60

470 **FIGURES AND ILLUSTRATIONS**

471 **Figure 1** Per protocol intervention scheme: the visits, questionnaires and samples

For peer review only

1  
2  
3 472 **Figure 2** Ordination plot on the weighted Unifrac distance at the genus level for selection of the  
4 473 donor candidates based on their gut microbiome alpha- and beta-diversity  
5  
6 474

7 475 These are the results of a comparative microbiome case-control study which helped us to preselect 14 donor candidates.  
8 476 Alpha diversity calculation was based on Chao 1 index. The beta-diversity calculation was based on non-metric dimensional  
9 477 scaling (NMDS) with weighted UniFrac distance matrix for bacterial Genus. NMDS axis 1 captured 46.8% of variability;  
10 478 NMDS axis 2 represents 14.7% of the variability. Healthy subjects were enriched in negative values of the first ordination  
11 479 axis; therefore, we selected donors among healthy subjects in this half of the graph and based on their microbiome's alpha  
12 480 diversity. The reason for concentrating healthy and enriched subjects in the left part of the plot could be their younger age.  
13  
14  
15  
16  
17  
18  
19  
20  
21  
22  
23  
24  
25  
26  
27  
28  
29  
30  
31  
32  
33  
34  
35  
36  
37  
38  
39  
40  
41  
42  
43  
44  
45  
46  
47  
48  
49  
50  
51  
52  
53  
54  
55  
56  
57  
58  
59  
60

For peer review only

1  
2  
3  
4  
5  
6  
7  
8  
9  
10  
11  
12  
13  
14  
15  
16  
17  
18  
19  
20  
21  
22  
23  
24  
25  
26  
27  
28  
29  
30  
31  
32  
33  
34  
35  
36  
37  
38  
39  
40  
41  
42  
43  
44  
45  
46  
47  
48  
49  
50  
51  
52  
53  
54  
55  
56  
57  
58  
59  
60

482 **Figure 3** Process of donor selection and reasons for their excluding

For peer review only



483 **Table 1.** Inclusion and exclusion criteria for FMT donors

|                  |                                                                                                                                                                                                                                                              |
|------------------|--------------------------------------------------------------------------------------------------------------------------------------------------------------------------------------------------------------------------------------------------------------|
| <b>Inclusion</b> | Adults aged 18-65 years                                                                                                                                                                                                                                      |
|                  | BMI 18,5-27 kg/m <sup>2</sup>                                                                                                                                                                                                                                |
|                  | Lack of restrictive diets (diet discussed with experienced gastroenterologist)                                                                                                                                                                               |
|                  | Bristol stool scale usually between 3 and 4                                                                                                                                                                                                                  |
|                  | High alpha diversity and significant difference in beta-diversity from patients (using 16S rDNA sequencing)                                                                                                                                                  |
|                  | Expected to donate regularly                                                                                                                                                                                                                                 |
|                  | Consented in writing                                                                                                                                                                                                                                         |
| <b>Exclusion</b> | Any chronic GI disease in patient's history (coeliac disease, inflammatory bowel disease, irritable bowel syndrome, colorectal carcinoma), or active acute GI issues (infectious gastroenteritis or enterocolitis, frequent bloating, diarrhoea or vomiting) |
|                  | Chronic disease in ' 'patient's history (cancer, autoimmune conditions, type 2 diabetes mellitus, coronary heart disease, hypertension, hypercholesterolemia, gout)                                                                                          |
|                  | <i>Clostridiodes difficile</i> infection in patient's history                                                                                                                                                                                                |
|                  | Colorectal carcinoma in family history                                                                                                                                                                                                                       |
|                  | Any restrictive diet habits (raw-vegans, fruitarians, keto or carnivore)                                                                                                                                                                                     |
|                  | Any systemic antibiotics in the last 6 months                                                                                                                                                                                                                |
|                  | Using proton-pump inhibitors in the last 6 months                                                                                                                                                                                                            |
|                  | Regular unprotected sex with unknown persons                                                                                                                                                                                                                 |

484

485 **Table 2** Laboratory screening of the FMT donors

|                                                                                                                                                                                                                         |
|-------------------------------------------------------------------------------------------------------------------------------------------------------------------------------------------------------------------------|
| <b>Blood testing</b>                                                                                                                                                                                                    |
| Hepatitis A, hepatitis B, hepatitis C and hepatitis E viruses (serology)                                                                                                                                                |
| HIV-1 and HIV-2 (p24 antigen)                                                                                                                                                                                           |
| Treponema pallidum (serology)                                                                                                                                                                                           |
| Strongyloides stercoralis (serology)                                                                                                                                                                                    |
| Complete blood cell count with differential                                                                                                                                                                             |
| Creatinine, aminotransferases, bilirubin                                                                                                                                                                                |
| <b>Stool testing</b>                                                                                                                                                                                                    |
| <i>Clostridioides difficile</i> (cultures, antigen testing)                                                                                                                                                             |
| Common enteric pathogens, including Salmonella, Shigella, Campylobacter, shiga toxin-producing <i>Escherichia coli</i> , Yersinia and <i>Vibrio cholerae</i> (cultures)                                                 |
| Antibiotic-resistant bacteria (ARB), including vancomycin-resistant Enterococci, meticillin-resistant <i>Staphylococcus aureus</i>                                                                                      |
| Gram-negative ARB including extended-spectrum $\beta$ -lactamase-producing <i>Enterobacteriaceae</i> , and carbapenem-resistant <i>Enterobacteriaceae</i> /carbapenemase-producing <i>Enterobacteriaceae</i> (cultures) |
| Norovirus, rotavirus, adenovirus, sapovirus (PCR)                                                                                                                                                                       |
| SARS-CoV-2 (reverse transcription -PCR)                                                                                                                                                                                 |
| Common intestinal parasites, including <i>Giardia intestinalis</i> , <i>Cryptosporidium parvum et hominis</i> (cultures and PCR), <i>Blastocystis hominis</i> *, <i>Dientamoeba fragilis</i> * (both PCR only)          |

486

487 \*) Based on the literature [21], we decided to test both parasites but did not exclude the donors if they were  
 488 tested positive and had no gastrointestinal symptoms. *Blastocystis* is believed to be commensal of the gut.  
 489 *Dientamoeba's* status is not exact; however, based on our experiment, it does not survive freezing at -80 °C and  
 490 thawing to 5°C when mixing the study microbiota mixture [22]. Therefore it can't do any harm.

491

492 The screening strategy is based on [14].

493 **Table 3.** Inclusion and exclusion criteria for recipients of FMT

|           |                                                                                                                                                           |
|-----------|-----------------------------------------------------------------------------------------------------------------------------------------------------------|
| Inclusion | Adults 18-65 years                                                                                                                                        |
|           | Diagnosed with IBS-D or IBS-M according to the Rome IV criteria                                                                                           |
|           | Expected adherence to following the protocol                                                                                                              |
|           | Written consent to the study                                                                                                                              |
| Exclusion | The use of antibiotics and probiotics within one month prior to faecal microbiota transplantation                                                         |
|           | History of inflammatory bowel disease or gastrointestinal malignancy, systemic autoimmune diseases (ongoing or in history)                                |
|           | Previous abdominal surgery (other than appendectomy or cholecystectomy or hernioplasty or cesarean section)                                               |
|           | HIV infection or other active infection                                                                                                                   |
|           | Renal or hepatic disease (both defined by biochemistry workup)                                                                                            |
|           | Diabetes mellitus, abnormal thyroid functions not controlled by thyroid medications                                                                       |
|           | Bipolar disorder or schizophrenia (ongoing or history thereof), moderately severe depression defined by Patient Health Questionnaire-9 (PHQ-9) score > 15 |
|           | Anxiety defined by a Generalised Anxiety Disorder 7 (GAD7) score > 10, with any organic causes that can explain the symptoms of IBS                       |
|           | Current pregnancy and lactation                                                                                                                           |

494

495 **Table 4.** The study visits with planned activities

| Visit                                                                                   | 0 | 1  | X  | 2+3 | 4 | X | 5 | 6 | 7+8 | 9  | X  | 10 | 11 |
|-----------------------------------------------------------------------------------------|---|----|----|-----|---|---|---|---|-----|----|----|----|----|
| <b>Study Week</b>                                                                       | ? | -2 | -1 | 1   | 2 | 3 | 5 | 8 | 9   | 10 | 11 | 13 | 32 |
| Eligibility evaluation (E) /<br>Randomization (R) /<br>Wrap-up visit (W) <sup>(1)</sup> | E | R  |    |     |   |   |   |   |     |    |    |    | W  |
| Colon enema with the<br>study substance (active<br>microbiota or placebo)               |   |    |    | XX  |   |   |   |   | XX  |    |    |    |    |
| Irritable bowel syndrome<br>severity scale score                                        |   | X  | X  |     |   | X | X | X |     |    | X  | X  | X  |
| Weight, height,<br>bioimpedance                                                         |   | X  |    |     | X |   | X |   |     | X  |    | X  | X  |
| Detailed anthropometry                                                                  |   | X  |    |     |   |   | X |   |     |    |    | X  | X  |
| Serum workup, archiving<br>serum+plasma                                                 |   | X  |    |     | X |   |   |   |     | X  |    |    | X  |
| Psychological evaluation                                                                |   | X  |    |     |   |   |   |   |     |    |    |    | X  |
| Dietary questionnaire &<br>advice, evaluation of<br>food records <sup>(2)</sup>         |   |    |    |     | X |   |   |   |     | X  |    |    |    |
| Stool samples for<br>microbiome analysis                                                | X | X  | X  |     | X | X | X | X |     | X  | X  | X  | X  |

496 (1) Here, the patient is offered a roll-over into an observational study with active microbiota administration. The patients  
497 will be informed of this option at the start of the study and regularly reminded.

498 (2) For IBS-SSS questionnaires assessing the primary outcome, please see the intervention scheme in Figure 2. Their  
499 administering is not linked to study visits.

1  
2  
3 500 **REFERENCES**

- 4 501 1. Lacy BE, Mearin F, Chang L, Chey WD, Lembo AJ, Simren M, et al. Bowel Disorders.  
5 502 Gastroenterology. 2016; 150(6):1393-1407.150.
- 6 503 2. Lovell RM, Ford AC. Global prevalence of and risk factors for irritable bowel syndrome: a  
7 504 meta-analysis. Clin Gastroenterol Hepatol. 2012;10 7:712-21.
- 8 505 3. Rajilic-Stojanovic M, Jonkers DM, Salonen A, Hanevik K, Raes J, Jalanka J, et al. Intestinal  
9 506 microbiota and diet in IBS: causes, consequences, or epiphenomena? Am J Gastroenterol.  
10 507 2015;110 2:278-87.
- 11 508 4. Kelly CP. Fecal microbiota transplantation--an old therapy comes of age. N Engl J Med.  
12 509 2013;368 5:474-5.
- 13 510 5. Johnsen PH, Hilpusch F, Cavanagh JP, Leikanger IS, Kolstad C, Valle PC, et al. Faecal  
14 511 microbiota transplantation versus placebo for moderate-to-severe irritable bowel syndrome:  
15 512 a double-blind, randomised, placebo-controlled, parallel-group, single-centre trial. Lancet  
16 513 Gastroenterol Hepatol. 2018;3 1:17-24.
- 17 514 6. El-Salhy M, Hatlebakk JG, Gilja OH, Brathen Kristoffersen A, Hausken T. Efficacy of faecal  
18 515 microbiota transplantation for patients with irritable bowel syndrome in a randomised,  
19 516 double-blind, placebo-controlled study. Gut. 2020;69 5:859-67.
- 20 517 7. Halkjaer SI, Christensen AH, Lo BZS, Browne PD, Gunther S, Hansen LH, et al. Faecal  
21 518 microbiota transplantation alters gut microbiota in patients with irritable bowel syndrome:  
22 519 results from a randomised, double-blind placebo-controlled study. Gut. 2018;67 12:2107-15.
- 23 520 8. Aroniadis OC, Brandt LJ, Oneto C, Feuerstadt P, Sherman A, Wolkoff AW, et al. Faecal  
24 521 microbiota transplantation for diarrhoea-predominant irritable bowel syndrome: a double-  
25 522 blind, randomised, placebo-controlled trial. Lancet Gastroenterol Hepatol. 2019;4 9:675-85.
- 26 523 9. Holster S, Lindqvist CM, Repsilber D, Salonen A, de Vos WM, Konig J, et al. The Effect of  
27 524 Allogenic Versus Autologous Fecal Microbiota Transfer on Symptoms, Visceral Perception  
28 525 and Fecal and Mucosal Microbiota in Irritable Bowel Syndrome: A Randomized Controlled  
29 526 Study. Clin Transl Gastroenterol. 2019;10 4:e00034.
- 30 527 10. Lahtinen P, Jalanka J, Hartikainen A, Mattila E, Hillila M, Punkkinen J, et al. Randomised  
31 528 clinical trial: faecal microbiota transplantation versus autologous placebo administered via  
32 529 colonoscopy in irritable bowel syndrome. Aliment Pharmacol Ther. 2020;51 12:1321-31.
- 33 530 11. Holvoet T, Joossens M, Vazquez-Castellanos JF, Christiaens E, Heyerick L, Boelens J, et al.  
34 531 Fecal Microbiota Transplantation Reduces Symptoms in Some Patients With Irritable Bowel  
35 532 Syndrome With Predominant Abdominal Bloating: Short- and Long-term Results From a  
36 533 Placebo-Controlled Randomized Trial. Gastroenterology. 2021;160 1:145-57 e8.
- 37 534 12. Wu J, Lv L, Wang C. Efficacy of Fecal Microbiota Transplantation in Irritable Bowel Syndrome:  
38 535 A Meta-Analysis of Randomized Controlled Trials. Front Cell Infect Microbiol.  
39 536 2022;12:827395.
- 40 537 13. Chan AW, Tetzlaff JM, Altman DG, Laupacis A, Gotzsche PC, Krleza-Jeric K, et al. SPIRIT 2013  
41 538 statement: defining standard protocol items for clinical trials. Ann Intern Med. 2013;158  
42 539 3:200-7.
- 43 540 14. Cammarota G, Ianiro G, Kelly CR, Mullish BH, Allegretti JR, Kassam Z, et al. International  
44 541 consensus conference on stool banking for faecal microbiota transplantation in clinical  
45 542 practice. Gut. 2019;68 12:2111-21.
- 46 543 15. Nanjing consensus on methodology of washed microbiota transplantation. Chin Med J (Engl).  
47 544 2020;133 19:2330-2.
- 48 545 16. Francis CY, Morris J, Whorwell PJ. The irritable bowel severity scoring system: a simple  
49 546 method of monitoring irritable bowel syndrome and its progress. Aliment Pharmacol Ther.  
50 547 1997;11 2:395-402.

- 1  
2  
3 548 17. Kozich JJ, Westcott SL, Baxter NT, Highlander SK, Schloss PD. Development of a dual-index  
4 549 sequencing strategy and curation pipeline for analyzing amplicon sequence data on the  
5 550 MiSeq Illumina sequencing platform. *Appl Environ Microbiol.* 2013;79 17:5112-20.
- 7 551 18. Callahan BJ, McMurdie PJ, Rosen MJ, Han AW, Johnson AJ, Holmes SP. DADA2: High-  
8 552 resolution sample inference from Illumina amplicon data. *Nat Methods.* 2016;13 7:581-3.
- 10 553 19. Kramna L, Cinek O. Virome Sequencing of Stool Samples. *Methods Mol Biol.* 2018;1838:59-  
11 554 83.
- 13 555 20. Palsson OS, Baggish JS, Turner MJ, Whitehead WE. IBS patients show frequent fluctuations  
14 556 between loose/watery and hard/lumpy stools: implications for treatment. *Am J*  
15 557 *Gastroenterol.* 2012;107 2:286-95.
- 16 558 21. Stensvold CR, van der Giezen M. Associations between Gut Microbiota and Common Luminal  
17 559 Intestinal Parasites. *Trends Parasitol.* 2018;34 5:369-77.
- 19 560 22. Hurych J, Vodolanova L, Vejmelka J, Drevinek P, Kohout P, Cinek O, et al. Freezing of faeces  
20 561 dramatically decreases the viability of *Blastocystis* sp. and *Dientamoeba fragilis*. *Eur J*  
21 562 *Gastroenterol Hepatol.* 2022;34 2:242-3

23 563  
24  
25  
26  
27  
28  
29  
30  
31  
32  
33  
34  
35  
36  
37  
38  
39  
40  
41  
42  
43  
44  
45  
46  
47  
48  
49  
50  
51  
52  
53  
54  
55  
56  
57  
58  
59  
60



Per protocol intervention scheme: the visits, questionnaires and samples

254x190mm (96 x 96 DPI)



Ordination plot on the weighted UniFrac distance at the genus level for selection of the donor candidates based on their gut microbiome alpha- and beta-diversity. These are the results of a comparative microbiome case-control study that helped us to preselect 14 donor candidates. Alpha diversity calculation was based on Chao 1 index. The beta-diversity calculation was based on non-metric dimensional scaling (NMDS) with a weighted UniFrac distance matrix for bacterial Genus. NMDS axis 1 captured 46.8% of variability; NMDS axis 2 represents 14.7% of the variability. Healthy subjects were enriched in negative values of the first ordination axis; therefore, we selected donors among healthy subjects in this half of the graph and based on their microbiome's alpha diversity. The reason for concentrating healthy and enriched subjects in the left part of the plot could be their younger age.

254x190mm (96 x 96 DPI)



1  
2  
3  
4  
5  
6  
7  
8  
9  
10  
11  
12  
13  
14  
15  
16  
17  
18  
19  
20  
21  
22  
23  
24  
25  
26  
27  
28  
29  
30  
31  
32  
33  
34  
35  
36  
37  
38  
39  
40  
41  
42  
43  
44  
45  
46  
47  
48  
49  
50  
51  
52  
53  
54  
55  
56  
57  
58  
59  
60

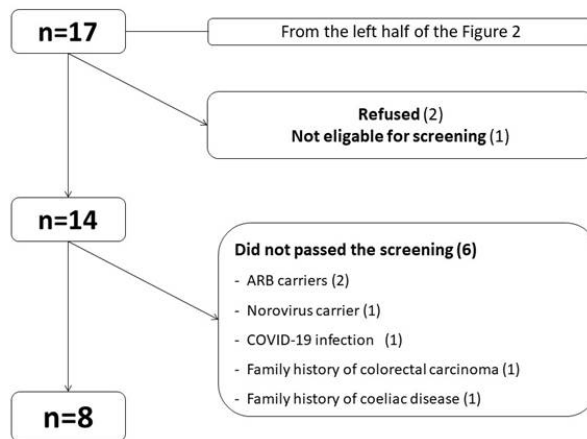

Process of donor selection and reasons for their excluding

254x190mm (96 x 96 DPI)

# Reporting checklist for protocol of a clinical trial.

Based on the SPIRIT guidelines.

## Appendix 1 SPIRIT CHECKLIST

|                                                         |                     | Reporting Item                                                                                                                                                                                                                                                                           | Page Number            |
|---------------------------------------------------------|---------------------|------------------------------------------------------------------------------------------------------------------------------------------------------------------------------------------------------------------------------------------------------------------------------------------|------------------------|
| <b>Administrative information</b>                       |                     |                                                                                                                                                                                                                                                                                          |                        |
| Title                                                   | <a href="#">#1</a>  | Descriptive title identifying the study design, population, interventions, and, if applicable, trial acronym                                                                                                                                                                             | 1                      |
| Trial registration                                      | <a href="#">#2a</a> | Trial identifier and registry name. If not yet registered, name of intended registry                                                                                                                                                                                                     | 6 and 19               |
| Trial registration: data set                            | <a href="#">#2b</a> | All items from the World Health Organization Trial Registration Data Set                                                                                                                                                                                                                 | NA – not received yet. |
| Protocol version                                        | <a href="#">#3</a>  | Date and version identifier                                                                                                                                                                                                                                                              | 19                     |
| Funding                                                 | <a href="#">#4</a>  | Sources and types of financial, material, and other support                                                                                                                                                                                                                              | 20                     |
| Roles and responsibilities: contributorship             | <a href="#">#5a</a> | Names, affiliations, and roles of protocol contributors                                                                                                                                                                                                                                  | 20                     |
| Roles and responsibilities: sponsor contact information | <a href="#">#5b</a> | Name and contact information for the trial sponsor                                                                                                                                                                                                                                       | 20                     |
| Roles and responsibilities: sponsor and funder          | <a href="#">#5c</a> | Role of study sponsor and funders, if any, in study design; collection, management, analysis, and interpretation of data; writing of the report; and the decision to submit the report for publication, including whether they will have ultimate authority over any of these activities | 20                     |

|    |                           |                      |                                                              |    |
|----|---------------------------|----------------------|--------------------------------------------------------------|----|
| 1  | Roles and                 | <a href="#">#5d</a>  | Composition, roles, and responsibilities of the              | 20 |
| 2  | responsibilities:         |                      | coordinating centre, steering committee, endpoint            |    |
| 3  | committees                |                      | adjudication committee, data management team, and            |    |
| 4  |                           |                      | other individuals or groups overseeing the trial, if         |    |
| 5  |                           |                      | applicable (see Item 21a for data monitoring committee)      |    |
| 6  |                           |                      |                                                              |    |
| 7  |                           |                      |                                                              |    |
| 8  |                           |                      |                                                              |    |
| 9  | <b>Introduction</b>       |                      |                                                              |    |
| 10 |                           |                      |                                                              |    |
| 11 | Background and            | <a href="#">#6a</a>  | Description of research question and justification for       | 7  |
| 12 | rationale                 |                      | undertaking the trial, including summary of relevant         |    |
| 13 |                           |                      | studies (published and unpublished) examining benefits       |    |
| 14 |                           |                      | and harms for each intervention                              |    |
| 15 |                           |                      |                                                              |    |
| 16 |                           |                      |                                                              |    |
| 17 |                           |                      |                                                              |    |
| 18 | Background and            | <a href="#">#6b</a>  | Explanation for choice of comparators                        | 8  |
| 19 | rationale: choice of      |                      |                                                              |    |
| 20 | comparators               |                      |                                                              |    |
| 21 |                           |                      |                                                              |    |
| 22 |                           |                      |                                                              |    |
| 23 | Objectives                | <a href="#">#7</a>   | Specific objectives or hypotheses                            | 8  |
| 24 |                           |                      |                                                              |    |
| 25 |                           |                      |                                                              |    |
| 26 | Trial design              | <a href="#">#8</a>   | Description of trial design including type of trial (eg,     | 9  |
| 27 |                           |                      | parallel group, crossover, factorial, single group),         |    |
| 28 |                           |                      | allocation ratio, and framework (eg, superiority,            |    |
| 29 |                           |                      | equivalence, non-inferiority, exploratory)                   |    |
| 30 |                           |                      |                                                              |    |
| 31 |                           |                      |                                                              |    |
| 32 |                           |                      |                                                              |    |
| 33 | <b>Methods:</b>           |                      |                                                              |    |
| 34 | <b>Participants,</b>      |                      |                                                              |    |
| 35 | <b>interventions, and</b> |                      |                                                              |    |
| 36 | <b>outcomes</b>           |                      |                                                              |    |
| 37 |                           |                      |                                                              |    |
| 38 |                           |                      |                                                              |    |
| 39 | Study setting             | <a href="#">#9</a>   | Description of study settings (eg, community clinic,         | 10 |
| 40 |                           |                      | academic hospital) and list of countries where data will     |    |
| 41 |                           |                      | be collected. Reference to where list of study sites can     |    |
| 42 |                           |                      | be obtained                                                  |    |
| 43 |                           |                      |                                                              |    |
| 44 |                           |                      |                                                              |    |
| 45 |                           |                      |                                                              |    |
| 46 | Eligibility criteria      | <a href="#">#10</a>  | Inclusion and exclusion criteria for participants. If        | 10 |
| 47 |                           |                      | applicable, eligibility criteria for study centres and       |    |
| 48 |                           |                      | individuals who will perform the interventions (eg,          |    |
| 49 |                           |                      | surgeons, psychotherapists)                                  |    |
| 50 |                           |                      |                                                              |    |
| 51 |                           |                      |                                                              |    |
| 52 |                           |                      |                                                              |    |
| 53 | Interventions:            | <a href="#">#11a</a> | Interventions for each group with sufficient detail to allow | 13 |
| 54 | description               |                      | replication, including how and when they will be             |    |
| 55 |                           |                      | administered                                                 |    |
| 56 |                           |                      |                                                              |    |
| 57 |                           |                      |                                                              |    |
| 58 |                           |                      |                                                              |    |
| 59 | Interventions:            | <a href="#">#11b</a> | Criteria for discontinuing or modifying allocated            | 13 |
| 60 |                           |                      |                                                              |    |

|    |                           |                      |                                                            |            |
|----|---------------------------|----------------------|------------------------------------------------------------|------------|
| 1  | modifications             |                      | interventions for a given trial participant (eg, drug dose |            |
| 2  |                           |                      | change in response to harms, participant request, or       |            |
| 3  |                           |                      | improving / worsening disease)                             |            |
| 4  |                           |                      |                                                            |            |
| 5  | Interventions:            | <a href="#">#11c</a> | Strategies to improve adherence to intervention            | 14         |
| 6  | adherence                 |                      | protocols, and any procedures for monitoring adherence     |            |
| 7  |                           |                      | (eg, drug tablet return; laboratory tests)                 |            |
| 8  |                           |                      |                                                            |            |
| 9  |                           |                      |                                                            |            |
| 10 | Interventions:            | <a href="#">#11d</a> | Relevant concomitant care and interventions that are       | 14         |
| 11 | concomitant care          |                      | permitted or prohibited during the trial                   |            |
| 12 |                           |                      |                                                            |            |
| 13 |                           |                      |                                                            |            |
| 14 | Outcomes                  | <a href="#">#12</a>  | Primary, secondary, and other outcomes, including the      | 13         |
| 15 |                           |                      | specific measurement variable (eg, systolic blood          |            |
| 16 |                           |                      | pressure), analysis metric (eg, change from baseline,      |            |
| 17 |                           |                      | final value, time to event), method of aggregation (eg,    |            |
| 18 |                           |                      | median, proportion), and time point for each outcome.      |            |
| 19 |                           |                      | Explanation of the clinical relevance of chosen efficacy   |            |
| 20 |                           |                      | and harm outcomes is strongly recommended                  |            |
| 21 |                           |                      |                                                            |            |
| 22 |                           |                      |                                                            |            |
| 23 |                           |                      |                                                            |            |
| 24 |                           |                      |                                                            |            |
| 25 |                           |                      |                                                            |            |
| 26 | Participant timeline      | <a href="#">#13</a>  | Time schedule of enrolment, interventions (including any   | See Figure |
| 27 |                           |                      | run-ins and washouts), assessments, and visits for         | 1          |
| 28 |                           |                      | participants. A schematic diagram is highly                |            |
| 29 |                           |                      | recommended (see Figure)                                   |            |
| 30 |                           |                      |                                                            |            |
| 31 |                           |                      |                                                            |            |
| 32 |                           |                      |                                                            |            |
| 33 | Sample size               | <a href="#">#14</a>  | Estimated number of participants needed to achieve         | 17         |
| 34 |                           |                      | study objectives and how it was determined, including      |            |
| 35 |                           |                      | clinical and statistical assumptions supporting any        |            |
| 36 |                           |                      | sample size calculations                                   |            |
| 37 |                           |                      |                                                            |            |
| 38 |                           |                      |                                                            |            |
| 39 |                           |                      |                                                            |            |
| 40 | Recruitment               | <a href="#">#15</a>  | Strategies for achieving adequate participant enrolment    | 11         |
| 41 |                           |                      | to reach target sample size                                |            |
| 42 |                           |                      |                                                            |            |
| 43 | <b>Methods:</b>           |                      |                                                            |            |
| 44 | <b>Assignment of</b>      |                      |                                                            |            |
| 45 | <b>interventions (for</b> |                      |                                                            |            |
| 46 | <b>controlled trials)</b> |                      |                                                            |            |
| 47 |                           |                      |                                                            |            |
| 48 |                           |                      |                                                            |            |
| 49 |                           |                      |                                                            |            |
| 50 | Allocation: sequence      | <a href="#">#16a</a> | Method of generating the allocation sequence (eg,          | 12         |
| 51 | generation                |                      | computer-generated random numbers), and list of any        |            |
| 52 |                           |                      | factors for stratification. To reduce predictability of a  |            |
| 53 |                           |                      | random sequence, details of any planned restriction (eg,   |            |
| 54 |                           |                      | blocking) should be provided in a separate document        |            |
| 55 |                           |                      | that is unavailable to those who enrol participants or     |            |
| 56 |                           |                      |                                                            |            |
| 57 |                           |                      |                                                            |            |
| 58 |                           |                      |                                                            |            |
| 59 |                           |                      |                                                            |            |
| 60 |                           |                      |                                                            |            |

assign interventions

|    |                        |                      |                                                             |
|----|------------------------|----------------------|-------------------------------------------------------------|
| 1  |                        |                      |                                                             |
| 2  |                        |                      |                                                             |
| 3  | Allocation             | <a href="#">#16b</a> | Mechanism of implementing the allocation sequence           |
| 4  | concealment            |                      | (eg, central telephone; sequentially numbered, opaque,      |
| 5  | mechanism              |                      | sealed envelopes), describing any steps to conceal the      |
| 6  |                        |                      | sequence until interventions are assigned                   |
| 7  |                        |                      |                                                             |
| 8  |                        |                      |                                                             |
| 9  | Allocation:            | <a href="#">#16c</a> | Who will generate the allocation sequence, who will         |
| 10 | implementation         |                      | enrol participants, and who will assign participants to     |
| 11 |                        |                      | interventions                                               |
| 12 |                        |                      |                                                             |
| 13 |                        |                      |                                                             |
| 14 | Blinding (masking)     | <a href="#">#17a</a> | Who will be blinded after assignment to interventions       |
| 15 |                        |                      | (eg, trial participants, care providers, outcome            |
| 16 |                        |                      | assessors, data analysts), and how                          |
| 17 |                        |                      |                                                             |
| 18 |                        |                      |                                                             |
| 19 |                        |                      |                                                             |
| 20 | Blinding (masking):    | <a href="#">#17b</a> | If blinded, circumstances under which unblinding is         |
| 21 | emergency unblinding   |                      | permissible, and procedure for revealing a participant's    |
| 22 |                        |                      | allocated intervention during the trial                     |
| 23 |                        |                      |                                                             |
| 24 |                        |                      |                                                             |
| 25 | <b>Methods: Data</b>   |                      |                                                             |
| 26 | <b>collection,</b>     |                      |                                                             |
| 27 | <b>management, and</b> |                      |                                                             |
| 28 | <b>analysis</b>        |                      |                                                             |
| 29 |                        |                      |                                                             |
| 30 |                        |                      |                                                             |
| 31 |                        |                      |                                                             |
| 32 | Data collection plan   | <a href="#">#18a</a> | Plans for assessment and collection of outcome,             |
| 33 |                        |                      | baseline, and other trial data, including any related       |
| 34 |                        |                      | processes to promote data quality (eg, duplicate            |
| 35 |                        |                      | measurements, training of assessors) and a description      |
| 36 |                        |                      | of study instruments (eg, questionnaires, laboratory        |
| 37 |                        |                      | tests) along with their reliability and validity, if known. |
| 38 |                        |                      | Reference to where data collection forms can be found,      |
| 39 |                        |                      | if not in the protocol                                      |
| 40 |                        |                      |                                                             |
| 41 |                        |                      |                                                             |
| 42 |                        |                      |                                                             |
| 43 |                        |                      |                                                             |
| 44 |                        |                      |                                                             |
| 45 | Data collection plan:  | <a href="#">#18b</a> | Plans to promote participant retention and complete         |
| 46 | retention              |                      | follow-up, including list of any outcome data to be         |
| 47 |                        |                      | collected for participants who discontinue or deviate       |
| 48 |                        |                      | from intervention protocols                                 |
| 49 |                        |                      |                                                             |
| 50 |                        |                      |                                                             |
| 51 |                        |                      |                                                             |
| 52 | Data management        | <a href="#">#19</a>  | Plans for data entry, coding, security, and storage,        |
| 53 |                        |                      | including any related processes to promote data quality     |
| 54 |                        |                      | (eg, double data entry; range checks for data values).      |
| 55 |                        |                      | Reference to where details of data management               |
| 56 |                        |                      | procedures can be found, if not in the protocol             |
| 57 |                        |                      |                                                             |
| 58 |                        |                      |                                                             |
| 59 |                        |                      |                                                             |
| 60 |                        |                      |                                                             |

|    |                            |                      |                                                              |          |
|----|----------------------------|----------------------|--------------------------------------------------------------|----------|
| 1  | Statistics: outcomes       | <a href="#">#20a</a> | Statistical methods for analysing primary and secondary      | 18       |
| 2  |                            |                      | outcomes. Reference to where other details of the            |          |
| 3  |                            |                      | statistical analysis plan can be found, if not in the        |          |
| 4  |                            |                      | protocol                                                     |          |
| 5  |                            |                      |                                                              |          |
| 6  |                            |                      |                                                              |          |
| 7  |                            |                      |                                                              |          |
| 8  | Statistics: additional     | <a href="#">#20b</a> | Methods for any additional analyses (eg, subgroup and        | 18       |
| 9  | analyses                   |                      | adjusted analyses)                                           |          |
| 10 |                            |                      |                                                              |          |
| 11 | Statistics: analysis       | <a href="#">#20c</a> | Definition of analysis population relating to protocol non-  | 18       |
| 12 | population and             |                      | adherence (eg, as randomised analysis), and any              |          |
| 13 | missing data               |                      | statistical methods to handle missing data (eg, multiple     |          |
| 14 |                            |                      | imputation)                                                  |          |
| 15 |                            |                      |                                                              |          |
| 16 |                            |                      |                                                              |          |
| 17 |                            |                      |                                                              |          |
| 18 | <b>Methods: Monitoring</b> |                      |                                                              |          |
| 19 |                            |                      |                                                              |          |
| 20 |                            |                      |                                                              |          |
| 21 | Data monitoring:           | <a href="#">#21a</a> | Composition of data monitoring committee (DMC);              | Appendix |
| 22 | formal committee           |                      | summary of its role and reporting structure; statement of    | 1        |
| 23 |                            |                      | whether it is independent from the sponsor and               |          |
| 24 |                            |                      | competing interests; and reference to where further          |          |
| 25 |                            |                      | details about its charter can be found, if not in the        |          |
| 26 |                            |                      | protocol. Alternatively, an explanation of why a DMC is      |          |
| 27 |                            |                      | not needed                                                   |          |
| 28 |                            |                      |                                                              |          |
| 29 |                            |                      |                                                              |          |
| 30 |                            |                      |                                                              |          |
| 31 |                            |                      |                                                              |          |
| 32 | Data monitoring:           | <a href="#">#21b</a> | Description of any interim analyses and stopping             | Appendix |
| 33 | interim analysis           |                      | guidelines, including who will have Access to these          | 1        |
| 34 |                            |                      | interim results and make the final decision to terminate     |          |
| 35 |                            |                      | the trial                                                    |          |
| 36 |                            |                      |                                                              |          |
| 37 |                            |                      |                                                              |          |
| 38 |                            |                      |                                                              |          |
| 39 | Harms                      | <a href="#">#22</a>  | Plans for collecting, assessing, reporting, and managing     | 17       |
| 40 |                            |                      | solicited and spontaneously reported adverse events          |          |
| 41 |                            |                      | and other unintended effects of trial interventions or trial |          |
| 42 |                            |                      | conduct                                                      |          |
| 43 |                            |                      |                                                              |          |
| 44 |                            |                      |                                                              |          |
| 45 |                            |                      |                                                              |          |
| 46 | Auditing                   | <a href="#">#23</a>  | Frequency and procedures for auditing trial conduct, if      | 20       |
| 47 |                            |                      | any, and whether the process will be independent from        |          |
| 48 |                            |                      | investigators and the sponsor                                |          |
| 49 |                            |                      |                                                              |          |
| 50 |                            |                      |                                                              |          |
| 51 | <b>Ethics and</b>          |                      |                                                              |          |
| 52 | <b>dissemination</b>       |                      |                                                              |          |
| 53 |                            |                      |                                                              |          |
| 54 |                            |                      |                                                              |          |
| 55 | Research ethics            | <a href="#">#24</a>  | Plans for seeking research ethics committee /                | 19       |
| 56 | approval                   |                      | institutional review board (REC / IRB) approval              |          |
| 57 |                            |                      |                                                              |          |
| 58 |                            |                      |                                                              |          |
| 59 | Protocol amendments        | <a href="#">#25</a>  | Plans for communicating important protocol                   | 20       |
| 60 |                            |                      |                                                              |          |

modifications (eg, changes to eligibility criteria, outcomes, analyses) to relevant parties (eg, investigators, REC / IRBs, trial participants, trial registries, journals, regulators)

|    |                          |                                                                                |          |
|----|--------------------------|--------------------------------------------------------------------------------|----------|
| 1  |                          |                                                                                |          |
| 2  |                          |                                                                                |          |
| 3  |                          |                                                                                |          |
| 4  |                          |                                                                                |          |
| 5  |                          |                                                                                |          |
| 6  |                          |                                                                                |          |
| 7  | Consent or assent        | <a href="#">#26a</a> Who will obtain informed consent or assent from           | 19       |
| 8  |                          | potential trial participants or authorised surrogates, and                     |          |
| 9  |                          | how (see Item 32)                                                              |          |
| 10 |                          |                                                                                |          |
| 11 |                          |                                                                                |          |
| 12 | Consent or assent:       | <a href="#">#26b</a> Additional consent provisions for collection and use of   | 19       |
| 13 | ancillary studies        | participant data and biological specimens in ancillary                         |          |
| 14 |                          | studies, if applicable                                                         |          |
| 15 |                          |                                                                                |          |
| 16 |                          |                                                                                |          |
| 17 | Confidentiality          | <a href="#">#27</a> How personal information about potential and enrolled      | 19       |
| 18 |                          | participants will be collected, shared, and maintained in                      |          |
| 19 |                          | order to protect confidentiality before, during, and after                     |          |
| 20 |                          | the trial                                                                      |          |
| 21 |                          |                                                                                |          |
| 22 |                          |                                                                                |          |
| 23 |                          |                                                                                |          |
| 24 | Declaration of           | <a href="#">#28</a> Financial and other competing interests for principal      | 20       |
| 25 | interests                | investigators for the overall trial and each study site                        |          |
| 26 |                          |                                                                                |          |
| 27 |                          |                                                                                |          |
| 28 | Data access              | <a href="#">#29</a> Statement of who will have Access to the final trial       | 18       |
| 29 |                          | dataset, and disclosure of contractual agreements that                         |          |
| 30 |                          | limit such Access for investigators                                            |          |
| 31 |                          |                                                                                |          |
| 32 |                          |                                                                                |          |
| 33 | Ancillary and post trial | <a href="#">#30</a> Provisions, if any, for ancillary and post-trial care, and | 19       |
| 34 | care                     | for compensation to those who suffer harm from trial                           |          |
| 35 |                          | participation                                                                  |          |
| 36 |                          |                                                                                |          |
| 37 |                          |                                                                                |          |
| 38 |                          |                                                                                |          |
| 39 | Dissemination policy:    | <a href="#">#31a</a> Plans for investigators and sponsor to communicate trial  | 19       |
| 40 | trial results            | results to participants, healthcare professionals, the                         |          |
| 41 |                          | public, and other relevant groups (eg, via publication,                        |          |
| 42 |                          | reporting in results databases, or other data sharing                          |          |
| 43 |                          | arrangements), including any publication restrictions                          |          |
| 44 |                          |                                                                                |          |
| 45 |                          |                                                                                |          |
| 46 |                          |                                                                                |          |
| 47 | Dissemination policy:    | <a href="#">#31b</a> Authorship eligibility guidelines and any intended use of | 20       |
| 48 | authorship               | professional writers                                                           |          |
| 49 |                          |                                                                                |          |
| 50 |                          |                                                                                |          |
| 51 | Dissemination policy:    | <a href="#">#31c</a> Plans, if any, for granting public Access to the full     | 20       |
| 52 | reproducible research    | protocol, participant-level dataset, and statistical code                      |          |
| 53 |                          |                                                                                |          |
| 54 |                          |                                                                                |          |
| 55 | <b>Appendices</b>        |                                                                                |          |
| 56 |                          |                                                                                |          |
| 57 | Informed consent         | <a href="#">#32</a> Model consent form and other related documentation         | Appendix |
| 58 | materials                | given to participants and authorised surrogates                                | 2        |
| 59 |                          |                                                                                |          |
| 60 |                          |                                                                                |          |

1 Biological specimens [#33](#) Plans for collection, laboratory evaluation, and storage 15-17  
2 of biological specimens for genetic or molecular analysis  
3 in the current trial and for future use in ancillary studies,  
4 if applicable  
5  
6  
7  
8  
9

10 None The SPIRIT Explanation and Elaboration paper is distributed under the terms of the Creative  
11 Commons Attribution License CC-BY-NC. This checklist can be completed online using  
12 <https://www.goodreports.org/>, a tool made by the [EQUATOR Network](#) in collaboration with  
13 [Penelope.ai](#)  
14  
15  
16  
17  
18  
19  
20  
21  
22  
23  
24  
25  
26  
27  
28  
29  
30  
31  
32  
33  
34  
35  
36  
37  
38  
39  
40  
41  
42  
43  
44  
45  
46  
47  
48  
49  
50  
51  
52  
53  
54  
55  
56  
57  
58  
59  
60



## APPENDIX 2

### Charter and responsibilities of the Data Monitoring and Safety Committee

A Data Monitoring and Safety Committee (DMSC) has been established, and its lead by Clinical Study Center at Thomayer University Hospital, Prague. The DMSC is an independent organ from the study investigators. During the period of recruitment to the study, interim analyses will be supplied, in strict confidence, to the DMSC. In the light of these interim analyses, the DMSC will advise the study steering committee (SSC) if, in its view, the active intervention has been proven, beyond reasonable doubt, to be different from the placebo in some or all patients

Based on the reports of DMSC, the Study steering committee (SSC) can then decide whether or not to modify recruitment to the study and its oncoming course. Unless this happens, however, the SSC, will remain ignorant of the interim results.

The frequency of interim analyses will depend on the judgement of the Chair of the DMSC, in consultation with the SSC. However, we anticipate that there might be two to three interim analyses and one final analysis.

The Chair of DSMC is Mr. Jiri Skopek, M.D., Ph.D. who is available on request at [jiri.skopek1@ftn.cz](mailto:jiri.skopek1@ftn.cz)

#### Premature termination of the study

An interim analysis is performed when 50% of patients have already got to Visit 5 (where primary outcome is evaluated.) The interim analysis is performed by a member of the study's statistical unit who is blinded for the allocation of the active study mixture. The statistician will report to the DMSC. The DMSC will have unblinded Access to all data and discuss the interim-analysis results with the SSC. The SSC decides on continuation or termination of the study and will report to the central Ethics committee. The study will be ended if the frequency of severe adverse events crosses the 5% line. Severe adverse event is defined as that one requiring hospitalisation.

### Appendix 3: Informed consent for FMT donors

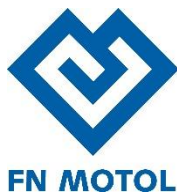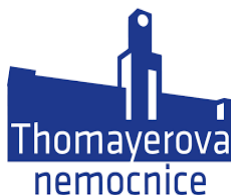

**Informovaný souhlas dospělé osoby s účastí na výzkumu změn střevního mikrobiomu u dospělých pacientů se syndromem dráždivého tračníku ve vědeckém projektu týmů Thomayerovy nemocnice a Fakultní nemocnice v Motole.**

Vážená paní/vážený pane,

syndrom dráždivého tračníku (irritable bowel syndrome, dále jen IBS) je nejčastější funkční onemocnění trávicího traktu, které pacienta výrazně omezuje v jeho každodenním životě. Může se projevovat různě, nejčastěji však jako delší dobu trvající bolest břicha s náhle vzniklým nutkáním na stolici. Léčba této nemoci je zdlouhavá, obtížná a ne vždy úspěšná. Dle recentních studií se však jako účinná léčebná metoda jeví transplantace střevní mikroflóry (faecal microbiota transplantation, dále jen FMT). A právě na její využití se zaměřuje náš projekt v podobě klinické intervenční studie.

Cílem projektu je zjistit, zda je transplantace stolice účinnou léčebnou metodou IBS a jak se po FMT mění složení střevní mikroflóry. K tomu abychom FMT mohli provést je potřeba mít vhodné dárce stolice. A právě zde byste nám mohli pomoci. Znalosti změn složení střevní mikroflóry po FMT bychom pak v budoucnu mohli využít buď k cílené ATB terapii negativně asociovaných bakterií nebo naopak k podávání probiotika prospěšných kmenů.

**Proto si Vás dovoluujeme pozvat k účasti na projektu vědeckých týmů Thomayerovy nemocnice a Fakultní nemocnice v Motole. Přečtěte si, prosím, toto poučení.** Pokud plně nerozumíte tomuto textu nebo pokud potřebujete doplňující informace, neváhejte se zeptat lékaře na emailu uvedeném níže. **Pokud souhlasíte s Vaší účastí ve studii, vyplňte prosím kontaktní údaje níže dokumentu a podepište prosím prohlášení, které se nachází v závěru tohoto informovaného souhlasu. Vaše účast je dobrovolná.** Tento souhlas můžete kdykoli zrušit, a to i bez udání důvodu.

Získání vzorku stolice by probíhalo ve vašem domácím prostředí. Stolice by bylo potřeba uchovat v běžném domácím mrazáku (teplota  $-20^{\circ}\text{C}$ ), k odběru byste byli vybaveni jednoduchými odběrovými sety s návodem a poučení o jejich používání. Po domluvě se členy vědeckého týmu (kontakt níže) by vzorky byly převezeny na naše pracoviště a hluboce zamrazeny ( $-80^{\circ}\text{C}$ ).

**Celý proces je dvoufázový.** Z prvního vzorku se provede molekulárně-genetická analýza a následně bioinformatické zpracování dat. Na základě výsledků bude vybráno asi 10-20 dárců, které kontaktujeme na základě informací uvedených níže. Splní-li kritéria vhodného dárce (pro vyžádání lze napsat na mail [jiri.vejmelka@ftn.cz](mailto:jiri.vejmelka@ftn.cz) nebo zavolat na tel.č. 731446619), budou poté znovu požádáni o darování stolice.

Po zpracování pro účely aktuální studie budou vzorky uchovány v hlubokomrazícím boxu v laboratořích Fakultní nemocnice v Motole. Jejich další využití proběhne pouze po přesné specifikaci formou dalšího souhlasu a Vaším podepsáním nového souhlasu.

V tomto projektu řádně dbáme o bezpečnost osobních údajů podle platných zákonů. Zejména je pak zcela zachovaná úplná anonymita pacienta při odesílání vzorků mimo naše pracoviště nebo při

### Appendix 3: Informed consent for FMT donors

zveřejňování vědeckých výsledků získaných z naší práce v odborných časopisech. Odebrané vzorky a z nich získané části jsou v našich laboratořích skladovány na dobu neurčitou, odděleně od osobních dat. Pokud byste v budoucnu svůj souhlas odvolali, Vaše jméno a ostatní osobní data budou bez prodlení vymazána z našich databází i papírových záznamů tak, aby se už nikdo nemohl dozvědět, komu vzorek patřil.

Bližší informace o nemoci jako takové můžete získat od členů vědeckého týmu:

**MUDr. Jiří Vejmelka** (Thomayerova nemocnice), tel: 731446619, email: [jiri.vejmelka@ftn.cz](mailto:jiri.vejmelka@ftn.cz)

**MUDr. Jakub Hurych** (Fakultní nemocnice v Motole), tel. 224432089, email: [jakub.hurych@lfmotol.cuni.cz](mailto:jakub.hurych@lfmotol.cuni.cz)

#### **Souhlas se zpracováním osobních údajů (dále jen „Souhlas“)**

udělený ve smyslu zákona č. 101/2000 Sb., o ochraně osobních údajů a o změně některých zákonů, ve znění pozdějších předpisů a s Nařízením Evropského parlamentu a Rady (EU) 2016/679

#### **Já, níže podepsaný**

*Jméno a příjmení:* .....

*Datum narození:* .....

*Rodné číslo:* .....

*Kontaktní email:* .....

*Telefonní číslo:* .....

#### **Souhlasím se zpracováním svých osobních údajů/ osobních údajů osoby jejíž jsem zákonným zástupcem Fakultní nemocnicí v Motole a Thomayerově nemocnici v rozsahu těchto údajů:**

*Jméno, příjmení, titul, datum a místo narození, rodné číslo, národnost, pohlaví, místo trvalého pobytu, telefon, email, výška, hmotnost*

Tento projev vůle je platný pouze v případě, že mé osobní údaje budou zpracovávány pouze v rozsahu nezbytném pro dosažení účelu zpracování uvedeného v tomto souhlasném prohlášení a v souladu s příslušnou legislativou v platném znění.

#### **Souhlas je poskytnut za účelem:**

*Zpracování vzorku stolice pro vědecko-výzkumnou činnost mající za cíl přispět k porozumění změn střevního mikrobiomu u dospělých pacientů se syndromem dráždivého tračníku*

#### **Souhlasím se zpracováním svých osobních údajů Fakultní nemocnicí v Motole a Thomayerově nemocnici po dobu:**

*Do odebrání mého souhlasu*

#### **Souhlasím se zpřístupněním svých osobních údajů Fakultní nemocnici v Motole a Thomayerově nemocnici:**

Fakultní nemocnice v Motole a Thomayerova nemocnice je oprávněna použít mé osobní údaje pouze v souladu s výše uvedeným účelem a po výše uvedenou dobu, nebo pro legitimní potřebu státních kontrolních

### Appendix 3: Informed consent for FMT donors

orgánů a orgánů činných v trestním řízení.

**Fakultní nemocnice v Motole a Thomayerova nemocnice** je dále oprávněna poskytnout mé osobní údaje pouze subjektům spolupracujícím s **Fakultní nemocnicí v Motole a Thomayerovou nemocnicí** na dosažení primárního účelu, pro který je udělen tento souhlas. S takovými subjekty se **Fakultní nemocnice v Motole a Thomayerova nemocnice** zavazuje uzavřít smlouvu obsahující stejné podmínky pro zpracování mých osobních údajů. Zpracování bude probíhat v souladu s příslušnými právními normami o ochraně osobních údajů a s Nařízením Evropského parlamentu a Rady (EU) 2016/679 ze dne 27. dubna 2016 o ochraně fyzických osob v souvislosti se zpracováním osobních údajů a o volném pohybu těchto údajů a o zrušení směrnice 95/46/ES (obecné nařízení o ochraně osobních údajů).

#### Byl/a jsem poučen/a o tom, že poskytnutí údajů je dobrovolné.

Dále jsem byl/a v souladu s příslušnou legislativou poučen/a:

- O svém právu tento souhlas odvolat, a to i bez udání důvodu,
- O svém právu přístupu k těmto údajům a právu na jejich opravu,
- O svém právu na vymazání těchto údajů, pokud dochází k jejich zpracování v rozporu s ochranou definovanou příslušnou legislativou nebo v rozporu s tímto souhlasem, nebo byl souhlas odvolán, svém právu podat stížnost u Úřadu pro ochranu osobních údajů.

Byl/a jsem také poučen/a o tom, že tato svá práva mohu uplatnit doručením žádosti na adresu: Fakultní nemocnice v Motole, Samostatné oddělení pověřence pro ochranu osobních údajů, V Úvalu 84, Praha 5.

Beru na vědomí, že odvolání tohoto souhlasu může ovlivnit dosažení účelu, pro který byl tento souhlas vydán, pokud tohoto účelu nelze dosáhnout jinak.

Prohlašuji, že jsem textu poučení porozuměl(a) a byl jsem lékařem srozumitelně informován(a) o povaze daného vyšetření a že jsem měl(a) možnost klást lékařovi doplňující dotazy.

Na základě tohoto poučení dále prohlašuji, že souhlasím se zařazením svých vzorků do studie probíhající v **Thomayerově nemocnici a Fakultní nemocnici v Motole**, jejímž cílem je porozumět změnám složení střevního mikrobiomu u dospělých pacientů se syndromem dráždivého tračníku.

V ..... dne .....

**Jméno a příjmení vyšetřované osoby** : .....

Podpis vyšetřované osoby .....

Prohlašuji, že jsem vysvětlil podstatu, účel a povahu odběrů pacientovi způsobem, který byl podle mého soudu srozumitelný.

**Jméno a příjmení lékaře**: .....

Podpis: .....

Datum: .....

**APPENDIX 4 – INFORMED CONSENT FORM FOR FMT RECIPIENTS (CZECH)****Informovaný souhlas pacienta - studie fekální mikrobiální terapie  
u pacientů se syndromem dráždivého tračníku**

Název studie: Fekální mikrobiální terapie u pacientů se syndromem dráždivého tračníku

Jméno pacienta:

Datum narození:

Pacient byl do studie zařazen pod číslem:

Odpovědný lékař:

1. Já, níže podepsaný (á) souhlasím s mou účastí ve studii. Je mi více než 18 let.
2. Byl (a) jsem podrobně informován (a) o cíli studie, o jejích postupech, a o tom, co se ode mě očekává. Lékař pověřený prováděním studie mi vysvětlil očekávané přínosy a případná zdravotní rizika, která by se mohla vyskytnout během mé účasti ve studii, a vysvětlil mi, jak bude postupovat při výskytu jejího nežádoucího průběhu. Beru na vědomí, že prováděná studie je výzkumnou činností. Beru na vědomí pravděpodobnost náhodného zařazení do jednotlivých skupin lišících se léčbou.
3. Informoval (a) jsem lékaře pověřeného studií o všech lécích, které jsem užíval (a) v posledních 3 měsících, i o těch, které v současnosti užívám. Bude-li mi nějaký lék předepsán jiným lékařem, budu ho informovat o své účasti v klinické studii a bez souhlasu lékaře pověřeného touto studií ho nevezmu.
4. Budu při své léčbě se svým lékařem spolupracovat a v případě výskytu jakéhokoliv neobvyklého nebo nečekaného příznaku ho budu ihned informovat.
5. Po celou dobu studie a další 4 týdny po jejím ukončení nebudu dárce krve.
6. Porozuměl (a) jsem tomu, že svou účast ve studii mohu kdykoliv přerušit či odstoupit, aniž by to jakkoliv ovlivnilo průběh mého dalšího léčení. Moje účast ve studii je dobrovolná.
7. Při zařazení do studie budou moje osobní data uchována s plnou ochranou důvěrnosti dle platných zákonů ČR. Do mé původní zdravotní dokumentace budou moci na základě mého uděleného souhlasu nahlédnout za účelem ověření získaných údajů zástupci nezávislých etických komisí a zahraničních nebo místních kompetentních úřadů. Pro tyto případy je zaručena ochrana důvěrnosti mých osobních dat. Při vlastním provádění studie mohou být osobní údaje poskytnuty jiným než výše uvedeným subjektům pouze bez identifikačních údajů, a to jako anonymní data pod číselným kódem. Rovněž pro výzkumné a vědecké účely mohou být moje osobní údaje poskytnuty pouze bez identifikačních údajů (anonymní data) nebo s mým výslovným souhlasem. Při předávání dat po 25. 5. 2018 bude zajištěna ochrana osobních údajů požadovaná „Nařízením Evropského parlamentu a Rady (EU) 2016/679 ze dne 27. dubna 2016 o ochraně fyzických osob v souvislosti se zpracováním osobních údajů“ známé pod označením GDPR.
8. S mou účastí ve studii není spojeno poskytnutí žádné odměny.
9. Porozuměl jsem tomu, že mé jméno se nebude nikdy vyskytovat v referátech o této studii. Já pak naopak nebudu proti použití výsledků z této studie.
10. Převzal/a jsem podepsaný stejnopis tohoto informovaného souhlasu.

Podpis pacienta:

Podpis lékaře pověřeného touto studií:

1  
2  
3  
4  
5  
6  
7  
8  
9  
10  
11  
12  
13  
14  
15  
16  
17  
18  
19  
20  
21  
22  
23  
24  
25  
26  
27  
28  
29  
30  
31  
32  
33  
34  
35  
36  
37  
38  
39  
40  
41  
42  
43  
44  
45  
46  
47  
48  
49  
50  
51  
52  
53  
54  
55  
56  
57  
58  
59  
60

Datum:

Datum:

For peer review only
