# Supplementary material for: Protocol for faecal microbiota transplantation in irritable bowel syndrome: the MISCEAT study – a randomised, double-blind cross-over study using mixed microbiota from healthy donors
Source: PubMed Central journal article supplement — BMJ Open. 2022 Jun 27;12(6):e056594. doi: 10.1136/bmjopen-2021-056594 (PMC9237876; doi:10.1136/bmjopen-2021-056594), 2022-06-27
Supplement: bmjopen-2021-056594supp004.pdf [file bmjopen-2021-056594supp004.pdf]

**APPENDIX 4 – INFORMED CONSENT FORM FOR FMT RECIPIENTS (CZECH)****Informovaný souhlas pacienta - studie fekální mikrobiální terapie u pacientů se syndromem dráždivého tračníku**

Název studie: Fekální mikrobiální terapie u pacientů se syndromem dráždivého tračníku

Jméno pacienta:

Datum narození:

Pacient byl do studie zařazen pod číslem:

Odpovědný lékař:

1. Já, níže podepsaný (á) souhlasím s mou účastí ve studii. Je mi více než 18 let.
2. Byl (a) jsem podrobně informován (a) o cíli studie, o jejích postupech, a o tom, co se ode mě očekává. Lékař pověřený prováděním studie mi vysvětlil očekávané přínosy a případná zdravotní rizika, která by se mohla vyskytnout během mé účasti ve studii, a vysvětlil mi, jak bude postupovat při výskytu jejího nežádoucího průběhu. Beru na vědomí, že prováděná studie je výzkumnou činností. Beru na vědomí pravděpodobnost náhodného zařazení do jednotlivých skupin lišících se léčbou.
3. Informoval (a) jsem lékaře pověřeného studií o všech lécích, které jsem užíval (a) v posledních 3 měsících, i o těch, které v současnosti užívám. Bude-li mi nějaký lék předepsán jiným lékařem, budu ho informovat o své účasti v klinické studii a bez souhlasu lékaře pověřeného touto studií ho nevezmu.
4. Budu při své léčbě se svým lékařem spolupracovat a v případě výskytu jakéhokoliv neobvyklého nebo nečekaného příznaku ho budu ihned informovat.
5. Po celou dobu studie a další 4 týdny po jejím ukončení nebudu dárce krve.
6. Porozuměl (a) jsem tomu, že svou účast ve studii mohu kdykoliv přerušit či odstoupit, aniž by to jakkoliv ovlivnilo průběh mého dalšího léčení. Moje účast ve studii je dobrovolná.
7. Při zařazení do studie budou moje osobní data uchována s plnou ochranou důvěrnosti dle platných zákonů ČR. Do mé původní zdravotní dokumentace budou moci na základě mého uděleného souhlasu nahlédnout za účelem ověření získaných údajů zástupci nezávislých etických komisí a zahraničních nebo místních kompetentních úřadů. Pro tyto případy je zaručena ochrana důvěrnosti mých osobních dat. Při vlastním provádění studie mohou být osobní údaje poskytnuty jiným než výše uvedeným subjektům pouze bez identifikačních údajů, a to jako anonymní data pod číselným kódem. Rovněž pro výzkumné a vědecké účely mohou být moje osobní údaje poskytnuty pouze bez identifikačních údajů (anonymní data) nebo s mým výslovným souhlasem. Při předávání dat po 25. 5. 2018 bude zajištěna ochrana osobních údajů požadovaná „Nařízením Evropského parlamentu a Rady (EU) 2016/679 ze dne 27. dubna 2016 o ochraně fyzických osob v souvislosti se zpracováním osobních údajů“ známé pod označením GDPR.
8. S mou účastí ve studii není spojeno poskytnutí žádné odměny.
9. Porozuměl jsem tomu, že mé jméno se nebude nikdy vyskytovat v referátech o této studii. Já pak naopak nebudu proti použití výsledků z této studie.
10. Převzal/a jsem podepsaný stejnopis tohoto informovaného souhlasu.

Podpis pacienta:

Podpis lékaře pověřeného touto studií:

Datum:

Datum:
